# Supplementary material for: Vet the journal before you submit: turnaround times of journals publishing in zoological medicine and related fields
Source: PeerJ. 2023 Jul 11;11:e15656. doi: 10.7717/peerj.15656 (PMC10348302; doi:10.7717/peerj.15656)
Supplement: Supplemental Information 1 — All 29,054 individual articles analyzed. [file peerj-11-15656-s001.xlsx]

## Sheet: S1 Data vet_med_all_records
	DOI	Rec	Acc	Onl	T.Acc	T.Onl	Journal
3	ajvr.82.4.310	2020-01-01	2020-06-26	2021-04-01	177	456	American Journal of Veterinary Research
4	ajvr.82.4.302	2019-11-19	2020-07-08	2021-04-01	232	499	American Journal of Veterinary Research
8	ajvr.82.4.274	2020-02-18	2020-07-29	2021-04-01	162	408	American Journal of Veterinary Research
11	ajvr.82.3.237	2020-05-18	2020-07-24	2021-03-01	67	287	American Journal of Veterinary Research
13	ajvr.82.3.225	2019-12-09	2020-05-04	2021-03-01	147	448	American Journal of Veterinary Research
16	ajvr.82.3.189	2020-01-30	2020-06-02	2021-03-01	124	396	American Journal of Veterinary Research
18	ajvr.82.3.171	2020-04-02	2020-06-23	2021-03-01	82	333	American Journal of Veterinary Research
19	ajvr.82.2.99	2020-02-18	2020-06-16	2021-02-01	119	349	American Journal of Veterinary Research
22	ajvr.82.2.138	2020-02-21	2020-05-11	2021-02-01	80	346	American Journal of Veterinary Research
25	ajvr.82.2.118	2020-01-31	2020-05-28	2021-02-01	118	367	American Journal of Veterinary Research
26	ajvr.82.2.110	2019-12-26	2020-05-04	2021-02-01	130	403	American Journal of Veterinary Research
28	ajvr.82.1.81	2020-03-27	2020-05-04	2021-01-01	38	280	American Journal of Veterinary Research
29	ajvr.82.1.71	2020-02-07	2020-05-15	2021-01-01	98	329	American Journal of Veterinary Research
31	ajvr.82.1.55	2019-12-30	2020-03-25	2021-01-01	86	368	American Journal of Veterinary Research
34	ajvr.82.1.28	2019-12-06	2020-04-20	2021-01-01	136	392	American Journal of Veterinary Research
35	ajvr.82.1.22	2020-04-11	2020-05-06	2021-01-01	25	265	American Journal of Veterinary Research
36	ajvr.82.1.11	2020-02-10	2020-05-01	2021-01-01	81	326	American Journal of Veterinary Research
37	ajvr.81.9.755	2019-11-10	2020-01-09	2020-09-01	60	296	American Journal of Veterinary Research
39	ajvr.81.9.739	2019-08-15	2020-01-16	2020-09-01	154	383	American Journal of Veterinary Research
41	ajvr.81.9.720	2019-07-12	2020-01-07	2020-09-01	179	417	American Journal of Veterinary Research
42	ajvr.81.9.714	2019-10-02	2020-01-07	2020-09-01	97	335	American Journal of Veterinary Research
43	ajvr.81.9.708	2019-03-11	2020-01-14	2020-09-01	309	540	American Journal of Veterinary Research
46	ajvr.81.8.673	2019-10-04	2020-01-02	2020-08-01	90	302	American Journal of Veterinary Research
48	ajvr.81.8.656	2019-08-01	2020-01-03	2020-08-01	155	366	American Journal of Veterinary Research
49	ajvr.81.8.651	2019-12-01	2020-01-13	2020-08-01	43	244	American Journal of Veterinary Research
50	ajvr.81.8.642	2019-07-08	2019-12-26	2020-08-01	171	390	American Journal of Veterinary Research
52	ajvr.81.8.627	2019-09-03	2019-12-30	2020-08-01	118	333	American Journal of Veterinary Research
58	ajvr.81.7.551	2019-09-27	2019-12-02	2020-07-01	66	278	American Journal of Veterinary Research
59	ajvr.81.7.543	2019-06-26	2019-11-27	2020-07-01	154	371	American Journal of Veterinary Research
60	ajvr.81.6.521	2019-08-11	2019-11-25	2020-06-01	106	295	American Journal of Veterinary Research
61	ajvr.81.6.514	2019-07-02	2019-11-25	2020-06-01	146	335	American Journal of Veterinary Research
62	ajvr.81.6.506	2019-08-06	2019-10-24	2020-06-01	79	300	American Journal of Veterinary Research
63	ajvr.81.6.499	2019-09-26	2019-12-11	2020-06-01	76	249	American Journal of Veterinary Research
65	ajvr.81.6.479	2019-07-23	2019-11-19	2020-06-01	119	314	American Journal of Veterinary Research
66	ajvr.81.6.471	2019-06-18	2019-11-20	2020-06-01	155	349	American Journal of Veterinary Research
67	ajvr.81.6.463	2018-12-13	2019-11-01	2020-06-01	323	536	American Journal of Veterinary Research
68	ajvr.81.5.448	2019-07-01	2019-09-03	2020-05-01	64	305	American Journal of Veterinary Research
69	ajvr.81.5.442	2019-04-29	2019-09-03	2020-05-01	127	368	American Journal of Veterinary Research
70	ajvr.81.5.437	2019-05-20	2019-10-28	2020-05-01	161	347	American Journal of Veterinary Research
72	ajvr.81.5.422	2019-06-29	2019-10-24	2020-05-01	117	307	American Journal of Veterinary Research
73	ajvr.81.5.416	2019-09-18	2019-10-30	2020-05-01	42	226	American Journal of Veterinary Research
74	ajvr.81.5.406	2019-08-16	2019-11-15	2020-05-01	91	259	American Journal of Veterinary Research
76	ajvr.81.5.394	2019-05-06	2019-10-25	2020-05-01	172	361	American Journal of Veterinary Research
78	ajvr.81.4.367	2019-06-04	2019-10-16	2020-04-01	134	302	American Journal of Veterinary Research
80	ajvr.81.4.355	2019-03-09	2019-10-09	2020-04-01	214	389	American Journal of Veterinary Research
82	ajvr.81.4.334	2019-05-15	2019-09-05	2020-04-01	113	322	American Journal of Veterinary Research
84	ajvr.81.4.317	2019-06-13	2019-10-28	2020-04-01	137	293	American Journal of Veterinary Research
87	ajvr.81.3.276	2019-04-01	2019-09-05	2020-03-01	157	335	American Journal of Veterinary Research
88	ajvr.81.3.267	2019-04-26	2019-09-05	2020-03-01	132	310	American Journal of Veterinary Research
89	ajvr.81.3.260	2019-06-17	2019-09-26	2020-03-01	101	258	American Journal of Veterinary Research
93	ajvr.81.3.227	2019-07-28	2019-09-24	2020-03-01	58	217	American Journal of Veterinary Research
94	ajvr.81.3.220	2019-06-04	2019-08-20	2020-03-01	77	271	American Journal of Veterinary Research
95	ajvr.81.3.210	2019-05-20	2019-08-21	2020-03-01	93	286	American Journal of Veterinary Research
97	ajvr.81.2.180	2019-05-01	2019-07-22	2020-02-01	82	276	American Journal of Veterinary Research
98	ajvr.81.2.172	2019-04-29	2019-08-19	2020-02-01	112	278	American Journal of Veterinary Research
99	ajvr.81.2.159	2019-05-17	2019-08-12	2020-02-01	87	260	American Journal of Veterinary Research
103	ajvr.81.2.131	2019-04-29	2019-07-17	2020-02-01	79	278	American Journal of Veterinary Research
105	ajvr.81.2.116	2019-03-11	2019-07-17	2020-02-01	128	327	American Journal of Veterinary Research
108	ajvr.81.12.973	2019-10-03	2020-03-02	2020-12-01	151	425	American Journal of Veterinary Research
112	ajvr.81.12.940	2019-07-24	2020-03-31	2020-12-01	251	496	American Journal of Veterinary Research
113	ajvr.81.12.930	2020-02-03	2020-04-06	2020-12-01	63	302	American Journal of Veterinary Research
115	ajvr.81.12.915	2019-11-10	2020-03-10	2020-12-01	121	387	American Journal of Veterinary Research
124	ajvr.81.11.843	2019-11-12	2020-03-17	2020-11-01	126	355	American Journal of Veterinary Research
125	ajvr.81.10.827	2019-11-25	2020-03-05	2020-10-01	101	311	American Journal of Veterinary Research
126	ajvr.81.10.821	2019-10-25	2020-03-09	2020-10-01	136	342	American Journal of Veterinary Research
128	ajvr.81.10.804	2019-09-12	2020-01-17	2020-10-01	127	385	American Journal of Veterinary Research
130	ajvr.81.10.790	2019-07-11	2020-01-22	2020-10-01	195	448	American Journal of Veterinary Research
132	ajvr.81.10.775	2019-10-29	2020-03-09	2020-10-01	132	338	American Journal of Veterinary Research
134	ajvr.81.1.77	2018-12-14	2019-07-02	2020-01-01	200	383	American Journal of Veterinary Research
136	ajvr.81.1.58	2019-04-16	2019-07-17	2020-01-01	92	260	American Journal of Veterinary Research
139	ajvr.81.1.33	2019-05-01	2019-07-08	2020-01-01	68	245	American Journal of Veterinary Research
140	ajvr.81.1.25	2018-12-19	2019-05-23	2020-01-01	155	378	American Journal of Veterinary Research
141	ajvr.81.1.17	2019-01-10	2019-05-23	2020-01-01	133	356	American Journal of Veterinary Research
142	ajvr.81.1.13	2019-02-25	2019-06-24	2020-01-01	119	310	American Journal of Veterinary Research
143	ajvr.80.9.885	2018-12-07	2019-02-13	2019-09-01	68	268	American Journal of Veterinary Research
144	ajvr.80.9.878	2018-10-02	2019-02-09	2019-09-01	130	334	American Journal of Veterinary Research
145	ajvr.80.9.868	2018-10-11	2019-01-08	2019-09-01	89	325	American Journal of Veterinary Research
153	ajvr.80.8.799	2018-10-05	2019-01-02	2019-08-01	89	300	American Journal of Veterinary Research
154	ajvr.80.8.792	2018-12-27	2019-03-04	2019-08-01	67	217	American Journal of Veterinary Research
161	ajvr.80.8.736	2018-09-11	2018-12-21	2019-08-01	101	324	American Journal of Veterinary Research
164	ajvr.80.7.702	2018-08-07	2018-10-30	2019-07-01	84	328	American Journal of Veterinary Research
167	ajvr.80.7.680	2018-02-23	2018-12-19	2019-07-01	299	493	American Journal of Veterinary Research
168	ajvr.80.7.670	2018-07-19	2018-11-05	2019-07-01	109	347	American Journal of Veterinary Research
169	ajvr.80.7.663	2018-04-10	2018-10-25	2019-07-01	198	447	American Journal of Veterinary Research
170	ajvr.80.7.657	2018-07-24	2018-12-05	2019-07-01	134	342	American Journal of Veterinary Research
171	ajvr.80.7.646	2018-04-30	2018-11-19	2019-07-01	203	427	American Journal of Veterinary Research
173	ajvr.80.7.631	2018-11-28	2019-01-08	2019-07-01	41	215	American Journal of Veterinary Research
174	ajvr.80.7.625	2018-05-19	2018-12-03	2019-07-01	198	408	American Journal of Veterinary Research
176	ajvr.80.6.601	2018-06-12	2018-10-25	2019-06-01	135	354	American Journal of Veterinary Research
177	ajvr.80.6.595	2018-06-19	2018-10-12	2019-06-01	115	347	American Journal of Veterinary Research
179	ajvr.80.6.578	2018-01-22	2018-11-08	2019-06-01	290	495	American Journal of Veterinary Research
180	ajvr.80.6.572	2018-07-12	2018-09-13	2019-06-01	63	324	American Journal of Veterinary Research
181	ajvr.80.6.565	2018-04-16	2018-10-19	2019-06-01	186	411	American Journal of Veterinary Research
182	ajvr.80.6.558	2018-03-09	2018-10-09	2019-06-01	214	449	American Journal of Veterinary Research
183	ajvr.80.6.547	2018-04-03	2018-07-30	2019-06-01	118	424	American Journal of Veterinary Research
185	ajvr.80.6.533	2018-08-16	2018-10-26	2019-06-01	71	289	American Journal of Veterinary Research
188	ajvr.80.5.498	2018-04-08	2018-09-04	2019-05-01	149	388	American Journal of Veterinary Research
190	ajvr.80.5.480	2018-06-12	2018-09-27	2019-05-01	107	323	American Journal of Veterinary Research
193	ajvr.80.5.455	2018-07-03	2018-10-17	2019-05-01	106	302	American Journal of Veterinary Research
195	ajvr.80.5.441	2018-04-16	2018-09-25	2019-05-01	162	380	American Journal of Veterinary Research
196	ajvr.80.5.434	2018-08-13	2018-10-09	2019-05-01	57	261	American Journal of Veterinary Research
197	ajvr.80.4.416	2018-03-01	2018-07-16	2019-04-01	137	396	American Journal of Veterinary Research
198	ajvr.80.4.410	2018-06-13	2018-09-10	2019-04-01	89	292	American Journal of Veterinary Research
199	ajvr.80.4.403	2018-04-26	2018-08-20	2019-04-01	116	340	American Journal of Veterinary Research
200	ajvr.80.4.396	2018-05-16	2018-09-10	2019-04-01	117	320	American Journal of Veterinary Research
204	ajvr.80.4.358	2018-05-16	2018-07-17	2019-04-01	62	320	American Journal of Veterinary Research
205	ajvr.80.4.347	2018-02-01	2018-08-21	2019-04-01	201	424	American Journal of Veterinary Research
207	ajvr.80.4.335	2018-06-21	2018-08-16	2019-04-01	56	284	American Journal of Veterinary Research
210	ajvr.80.3.300	2018-03-16	2018-07-09	2019-03-01	115	350	American Journal of Veterinary Research
213	ajvr.80.3.275	2018-05-15	2018-07-30	2019-03-01	76	290	American Journal of Veterinary Research
214	ajvr.80.3.270	2018-05-11	2018-08-02	2019-03-01	83	294	American Journal of Veterinary Research
215	ajvr.80.3.265	2017-10-03	2018-06-26	2019-03-01	266	514	American Journal of Veterinary Research
218	ajvr.80.3.235	2018-01-31	2018-07-30	2019-03-01	180	394	American Journal of Veterinary Research
219	ajvr.80.3.230	2018-07-20	2018-08-29	2019-03-01	40	224	American Journal of Veterinary Research
222	ajvr.80.2.195	2018-04-15	2018-06-07	2019-02-01	53	292	American Journal of Veterinary Research
224	ajvr.80.2.178	2018-03-01	2018-06-11	2019-02-01	102	337	American Journal of Veterinary Research
226	ajvr.80.2.168	2018-01-30	2018-05-21	2019-02-01	111	367	American Journal of Veterinary Research
230	ajvr.80.2.135	2018-03-24	2018-06-20	2019-02-01	88	314	American Journal of Veterinary Research
231	ajvr.80.2.129	2018-04-09	2018-06-20	2019-02-01	72	298	American Journal of Veterinary Research
235	ajvr.80.12.1122	2019-03-13	2019-06-03	2019-12-01	82	263	American Journal of Veterinary Research
236	ajvr.80.12.1114	2019-01-28	2019-05-21	2019-12-01	113	307	American Journal of Veterinary Research
237	ajvr.80.12.1107	2019-02-20	2019-06-14	2019-12-01	114	284	American Journal of Veterinary Research
238	ajvr.80.12.1099	2018-12-22	2019-06-03	2019-12-01	163	344	American Journal of Veterinary Research
239	ajvr.80.12.1089	2019-04-01	2019-05-30	2019-12-01	59	244	American Journal of Veterinary Research
240	ajvr.80.12.1082	2019-04-15	2019-05-28	2019-12-01	43	230	American Journal of Veterinary Research
241	ajvr.80.12.1074	2019-03-07	2019-06-13	2019-12-01	98	269	American Journal of Veterinary Research
242	ajvr.80.12.1067	2019-02-15	2019-06-19	2019-12-01	124	289	American Journal of Veterinary Research
243	ajvr.80.11.995	2019-04-05	2019-05-14	2019-11-01	39	210	American Journal of Veterinary Research
245	ajvr.80.11.1043	2019-05-01	2019-06-07	2019-11-01	37	184	American Journal of Veterinary Research
246	ajvr.80.11.1034	2019-02-05	2019-04-16	2019-11-01	70	269	American Journal of Veterinary Research
247	ajvr.80.11.1026	2019-04-15	2019-05-17	2019-11-01	32	200	American Journal of Veterinary Research
248	ajvr.80.11.1020	2019-03-30	2019-05-23	2019-11-01	54	216	American Journal of Veterinary Research
250	ajvr.80.11.1007	2018-10-17	2019-05-16	2019-11-01	211	380	American Journal of Veterinary Research
251	ajvr.80.11.1001	2019-02-13	2019-05-21	2019-11-01	97	261	American Journal of Veterinary Research
252	ajvr.80.10.976	2019-04-06	2019-05-06	2019-10-01	30	178	American Journal of Veterinary Research
254	ajvr.80.10.963	2018-12-04	2019-04-02	2019-10-01	119	301	American Journal of Veterinary Research
255	ajvr.80.10.957	2019-04-12	2019-05-15	2019-10-01	33	172	American Journal of Veterinary Research
259	ajvr.80.10.923	2019-01-22	2019-04-16	2019-10-01	84	252	American Journal of Veterinary Research
260	ajvr.80.10.912	2018-10-09	2019-03-22	2019-10-01	164	357	American Journal of Veterinary Research
261	ajvr.80.10.907	2019-03-20	2019-05-13	2019-10-01	54	195	American Journal of Veterinary Research
262	ajvr.80.1.95	2018-02-12	2018-05-04	2019-01-01	81	323	American Journal of Veterinary Research
264	ajvr.80.1.79	2017-12-20	2018-04-09	2019-01-01	110	377	American Journal of Veterinary Research
266	ajvr.80.1.69	2018-03-12	2018-04-25	2019-01-01	44	295	American Journal of Veterinary Research
268	ajvr.80.1.45	2018-02-08	2018-05-07	2019-01-01	88	327	American Journal of Veterinary Research
270	ajvr.80.1.24	2018-03-06	2018-05-21	2019-01-01	76	301	American Journal of Veterinary Research
271	ajvr.80.1.15	2018-01-30	2018-05-04	2019-01-01	94	336	American Journal of Veterinary Research
272	ajvr.80.1.102	2018-02-20	2018-06-05	2019-01-01	105	315	American Journal of Veterinary Research
273	ajvr.79.9.995	2017-04-12	2017-11-29	2018-09-01	231	507	American Journal of Veterinary Research
274	ajvr.79.9.986	2017-07-07	2017-11-30	2018-09-01	146	421	American Journal of Veterinary Research
276	ajvr.79.9.970	2017-05-12	2017-12-13	2018-09-01	215	477	American Journal of Veterinary Research
279	ajvr.79.9.941	2017-09-29	2017-12-14	2018-09-01	76	337	American Journal of Veterinary Research
280	ajvr.79.9.933	2017-11-09	2017-12-22	2018-09-01	43	296	American Journal of Veterinary Research
282	ajvr.79.9.915	2017-10-10	2017-12-26	2018-09-01	77	326	American Journal of Veterinary Research
283	ajvr.79.9.1001	2017-08-25	2017-11-08	2018-09-01	75	372	American Journal of Veterinary Research
284	ajvr.79.8.893	2017-02-07	2017-10-05	2018-08-01	240	540	American Journal of Veterinary Research
286	ajvr.79.8.874	2018-08-08	2017-09-28	2018-08-01	-314	-7	American Journal of Veterinary Research
287	ajvr.79.8.867	2017-02-15	2017-11-28	2018-08-01	286	532	American Journal of Veterinary Research
288	ajvr.79.8.858	2017-05-10	2017-08-15	2018-08-01	97	448	American Journal of Veterinary Research
289	ajvr.79.8.852	2017-06-01	2017-12-13	2018-08-01	195	426	American Journal of Veterinary Research
295	ajvr.79.8.803	2017-06-06	2017-10-25	2018-08-01	141	421	American Journal of Veterinary Research
296	ajvr.79.7.787	2017-09-08	2017-11-06	2018-07-01	59	296	American Journal of Veterinary Research
297	ajvr.79.7.779	2017-08-15	2017-11-17	2018-07-01	94	320	American Journal of Veterinary Research
300	ajvr.79.7.755	2017-07-21	2017-09-29	2018-07-01	70	345	American Journal of Veterinary Research
301	ajvr.79.7.745	2017-05-11	2017-10-02	2018-07-01	144	416	American Journal of Veterinary Research
302	ajvr.79.7.733	2017-07-05	2017-09-11	2018-07-01	68	361	American Journal of Veterinary Research
304	ajvr.79.7.718	2017-05-19	2017-10-06	2018-07-01	140	408	American Journal of Veterinary Research
306	ajvr.79.7.704	2017-09-13	2017-11-06	2018-07-01	54	291	American Journal of Veterinary Research
307	ajvr.79.7.697	2017-10-04	2017-11-06	2018-07-01	33	270	American Journal of Veterinary Research
309	ajvr.79.6.664	2017-02-17	2017-06-29	2018-06-01	132	469	American Journal of Veterinary Research
310	ajvr.79.6.658	2017-04-09	2017-08-07	2018-06-01	120	418	American Journal of Veterinary Research
311	ajvr.79.6.650	2017-06-01	2017-09-18	2018-06-01	109	365	American Journal of Veterinary Research
312	ajvr.79.6.643	2017-04-17	2017-08-03	2018-06-01	108	410	American Journal of Veterinary Research
313	ajvr.79.6.637	2017-01-20	2017-07-21	2018-06-01	182	497	American Journal of Veterinary Research
315	ajvr.79.6.621	2017-06-27	2017-09-19	2018-06-01	84	339	American Journal of Veterinary Research
316	ajvr.79.6.614	2017-06-28	2017-08-17	2018-06-01	50	338	American Journal of Veterinary Research
319	ajvr.79.6.592	2017-06-27	2017-09-05	2018-06-01	70	339	American Journal of Veterinary Research
320	ajvr.79.5.576	2017-04-18	2017-07-31	2018-05-01	104	378	American Journal of Veterinary Research
322	ajvr.79.5.562	2017-04-24	2017-07-14	2018-05-01	81	372	American Journal of Veterinary Research
323	ajvr.79.5.555	2017-08-03	2017-09-07	2018-05-01	35	271	American Journal of Veterinary Research
324	ajvr.79.5.546	2017-05-02	2017-08-21	2018-05-01	111	364	American Journal of Veterinary Research
326	ajvr.79.5.532	2017-05-08	2017-08-28	2018-05-01	112	358	American Journal of Veterinary Research
329	ajvr.79.5.505	2017-03-22	2017-06-26	2018-05-01	96	405	American Journal of Veterinary Research
331	ajvr.79.5.487	2017-08-08	2017-09-11	2018-05-01	34	266	American Journal of Veterinary Research
332	ajvr.79.4.455	2016-12-01	2017-07-12	2018-04-01	223	486	American Journal of Veterinary Research
334	ajvr.79.4.443	2017-03-19	2017-06-14	2018-04-01	87	378	American Journal of Veterinary Research
338	ajvr.79.4.404	2017-04-07	2017-08-02	2018-04-01	117	359	American Journal of Veterinary Research
339	ajvr.79.4.397	2017-03-16	2017-07-11	2018-04-01	117	381	American Journal of Veterinary Research
345	ajvr.79.3.333	2017-04-26	2017-07-05	2018-03-01	70	309	American Journal of Veterinary Research
349	ajvr.79.3.299	2017-02-02	2017-06-12	2018-03-01	130	392	American Journal of Veterinary Research
350	ajvr.79.3.287	2017-02-13	2017-06-26	2018-03-01	133	381	American Journal of Veterinary Research
351	ajvr.79.3.282	2017-02-27	2017-06-12	2018-03-01	105	367	American Journal of Veterinary Research
352	ajvr.79.3.276	2017-08-29	2017-10-12	2018-03-01	44	184	American Journal of Veterinary Research
354	ajvr.79.3.260	2016-10-10	2017-06-08	2018-03-01	241	507	American Journal of Veterinary Research
355	ajvr.79.2.233	2017-03-10	2017-05-19	2018-02-01	70	328	American Journal of Veterinary Research
356	ajvr.79.2.226	2017-01-14	2017-06-01	2018-02-01	138	383	American Journal of Veterinary Research
358	ajvr.79.2.211	2016-11-11	2017-05-09	2018-02-01	179	447	American Journal of Veterinary Research
361	ajvr.79.2.181	2016-10-03	2017-05-12	2018-02-01	221	486	American Journal of Veterinary Research
364	ajvr.79.2.163	2017-03-02	2017-05-18	2018-02-01	77	336	American Journal of Veterinary Research
365	ajvr.79.2.154	2017-03-14	2017-05-16	2018-02-01	63	324	American Journal of Veterinary Research
367	ajvr.79.12.1335	2018-01-22	2018-03-21	2018-12-01	58	313	American Journal of Veterinary Research
368	ajvr.79.12.1321	2018-01-28	2018-04-13	2018-12-01	75	307	American Journal of Veterinary Research
372	ajvr.79.12.1287	2017-06-19	2018-03-19	2018-12-01	273	530	American Journal of Veterinary Research
374	ajvr.79.12.1268	2017-05-17	2018-02-12	2018-12-01	271	563	American Journal of Veterinary Research
376	ajvr.79.12.1253	2018-01-07	2018-04-19	2018-12-01	102	328	American Journal of Veterinary Research
377	ajvr.79.12.1246	2018-03-03	2018-04-20	2018-12-01	48	273	American Journal of Veterinary Research
378	ajvr.79.12.1239	2017-10-04	2018-05-16	2018-12-01	224	423	American Journal of Veterinary Research
379	ajvr.79.11.1217	2017-11-14	2018-03-16	2018-11-01	122	352	American Journal of Veterinary Research
382	ajvr.79.11.1193	2017-12-29	2018-03-27	2018-11-01	88	307	American Journal of Veterinary Research
383	ajvr.79.11.1188	2017-12-13	2018-04-09	2018-11-01	117	323	American Journal of Veterinary Research
384	ajvr.79.11.1179	2017-09-15	2018-01-17	2018-11-01	124	412	American Journal of Veterinary Research
386	ajvr.79.11.1160	2017-12-06	2018-04-03	2018-11-01	118	330	American Journal of Veterinary Research
387	ajvr.79.11.1150	2017-10-06	2018-01-30	2018-11-01	116	391	American Journal of Veterinary Research
388	ajvr.79.11.1140	2018-02-05	2018-03-27	2018-11-01	50	269	American Journal of Veterinary Research
390	ajvr.79.11.1123	2017-04-03	2017-11-06	2018-11-01	217	577	American Journal of Veterinary Research
391	ajvr.79.10.1100	2017-10-29	2018-01-09	2018-10-01	72	337	American Journal of Veterinary Research
392	ajvr.79.10.1093	2017-11-08	2018-03-13	2018-10-01	125	327	American Journal of Veterinary Research
393	ajvr.79.10.1087	2017-10-17	2018-02-01	2018-10-01	107	349	American Journal of Veterinary Research
394	ajvr.79.10.1079	2017-10-04	2017-12-27	2018-10-01	84	362	American Journal of Veterinary Research
395	ajvr.79.10.1071	2017-07-25	2017-12-13	2018-10-01	141	433	American Journal of Veterinary Research
396	ajvr.79.10.1064	2017-07-13	2017-12-18	2018-10-01	158	445	American Journal of Veterinary Research
398	ajvr.79.10.1050	2017-10-24	2018-01-12	2018-10-01	80	342	American Journal of Veterinary Research
399	ajvr.79.10.1044	2017-09-08	2018-01-22	2018-10-01	136	388	American Journal of Veterinary Research
401	ajvr.79.10.1028	2017-09-25	2018-01-10	2018-10-01	107	371	American Journal of Veterinary Research
402	ajvr.79.10.1021	2017-12-07	2018-02-22	2018-10-01	77	298	American Journal of Veterinary Research
404	ajvr.79.1.90	2017-02-09	2017-04-24	2018-01-01	74	326	American Journal of Veterinary Research
405	ajvr.79.1.83	2016-08-22	2017-03-06	2018-01-01	196	497	American Journal of Veterinary Research
407	ajvr.79.1.62	2016-12-13	2017-05-08	2018-01-01	146	384	American Journal of Veterinary Research
409	ajvr.79.1.42	2016-12-31	2017-04-03	2018-01-01	93	366	American Journal of Veterinary Research
410	ajvr.79.1.33	2016-12-01	2017-04-05	2018-01-01	125	396	American Journal of Veterinary Research
413	ajvr.79.1.124	2016-11-03	2017-03-28	2018-01-01	145	424	American Journal of Veterinary Research
414	ajvr.79.1.115	2016-09-22	2017-03-28	2018-01-01	187	466	American Journal of Veterinary Research
415	ajvr.79.1.107	2016-08-29	2017-04-19	2018-01-01	233	490	American Journal of Veterinary Research
416	AJVR Vol 82 No. 7	2020-01-22	2020-10-08	2021-07-01	260	526	American Journal of Veterinary Research
417	AJVR Vol 82 No. 8	2020-06-21	2020-10-21	2021-08-01	122	406	American Journal of Veterinary Research
421	AJVR Vol 82 No. 5	2020-07-30	2020-09-28	2021-05-01	60	275	American Journal of Veterinary Research
426	AJVR Vol 82 No. 6	2020-06-05	2020-10-09	2021-06-01	126	361	American Journal of Veterinary Research
445	AJVR Vol 82 No. 4	2020-01-01	2020-06-26	2021-04-01	177	456	American Journal of Veterinary Research
453	AJVR Vol 82 No. 3	2020-05-18	2020-07-24	2021-03-01	67	287	American Journal of Veterinary Research
461	AJVR Vol 82 No. 2	2020-02-18	2020-06-16	2021-02-01	119	349	American Journal of Veterinary Research
470	AJVR Vol 82 No. 1	2020-03-27	2020-05-04	2021-01-01	38	280	American Journal of Veterinary Research
479	AJVR Vol 81 No. 9	2019-11-10	2020-01-09	2020-09-01	60	296	American Journal of Veterinary Research
488	AJVR Vol 81 No. 8	2019-10-04	2020-01-02	2020-08-01	90	302	American Journal of Veterinary Research
500	AJVR Vol 81 No. 7	2019-09-27	2019-12-02	2020-07-01	66	278	American Journal of Veterinary Research
502	AJVR Vol 81 No. 6	2019-08-11	2019-11-25	2020-06-01	106	295	American Journal of Veterinary Research
510	AJVR Vol 81 No. 5	2019-07-01	2019-09-03	2020-05-01	64	305	American Journal of Veterinary Research
520	AJVR Vol 81 No. 4	2019-06-04	2019-10-16	2020-04-01	134	302	American Journal of Veterinary Research
529	AJVR Vol 81 No. 3	2019-04-01	2019-09-05	2020-03-01	157	335	American Journal of Veterinary Research
539	AJVR Vol 81 No. 2	2019-05-01	2019-07-22	2020-02-01	82	276	American Journal of Veterinary Research
550	AJVR Vol 81 No. 12	2019-10-03	2020-03-02	2020-12-01	151	425	American Journal of Veterinary Research
566	AJVR Vol 81 No. 11	2019-11-12	2020-03-17	2020-11-01	126	355	American Journal of Veterinary Research
567	AJVR Vol 81 No. 10	2019-11-25	2020-03-05	2020-10-01	101	311	American Journal of Veterinary Research
576	AJVR Vol 81 No. 1	2018-12-14	2019-07-02	2020-01-01	200	383	American Journal of Veterinary Research
585	AJVR Vol 80 No. 9	2018-12-07	2019-02-13	2019-09-01	68	268	American Journal of Veterinary Research
595	AJVR Vol 80 No. 8	2018-10-05	2019-01-02	2019-08-01	89	300	American Journal of Veterinary Research
606	AJVR Vol 80 No. 7	2018-08-07	2018-10-30	2019-07-01	84	328	American Journal of Veterinary Research
618	AJVR Vol 80 No. 6	2018-06-12	2018-10-25	2019-06-01	135	354	American Journal of Veterinary Research
630	AJVR Vol 80 No. 5	2018-04-08	2018-09-04	2019-05-01	149	388	American Journal of Veterinary Research
639	AJVR Vol 80 No. 4	2018-03-01	2018-07-16	2019-04-01	137	396	American Journal of Veterinary Research
652	AJVR Vol 80 No. 3	2018-03-16	2018-07-09	2019-03-01	115	350	American Journal of Veterinary Research
664	AJVR Vol 80 No. 2	2018-04-15	2018-06-07	2019-02-01	53	292	American Journal of Veterinary Research
677	AJVR Vol 80 No. 12	2019-03-13	2019-06-03	2019-12-01	82	263	American Journal of Veterinary Research
685	AJVR Vol 80 No. 11	2019-04-05	2019-05-14	2019-11-01	39	210	American Journal of Veterinary Research
694	AJVR Vol 80 No. 10	2019-04-06	2019-05-06	2019-10-01	30	178	American Journal of Veterinary Research
704	AJVR Vol 80 No. 1	2018-02-12	2018-05-04	2019-01-01	81	323	American Journal of Veterinary Research
715	AJVR Vol 79 No. 9	2017-04-12	2017-11-29	2018-09-01	231	507	American Journal of Veterinary Research
726	AJVR Vol 79 No. 8	2017-02-07	2017-10-05	2018-08-01	240	540	American Journal of Veterinary Research
738	AJVR Vol 79 No. 7	2017-09-08	2017-11-06	2018-07-01	59	296	American Journal of Veterinary Research
751	AJVR Vol 79 No. 6	2017-02-17	2017-06-29	2018-06-01	132	469	American Journal of Veterinary Research
762	AJVR Vol 79 No. 5	2017-04-18	2017-07-31	2018-05-01	104	378	American Journal of Veterinary Research
774	AJVR Vol 79 No. 4	2016-12-01	2017-07-12	2018-04-01	223	486	American Journal of Veterinary Research
787	AJVR Vol 79 No. 3	2017-04-26	2017-07-05	2018-03-01	70	309	American Journal of Veterinary Research
797	AJVR Vol 79 No. 2	2017-03-10	2017-05-19	2018-02-01	70	328	American Journal of Veterinary Research
809	AJVR Vol 79 No. 12	2018-01-22	2018-03-21	2018-12-01	58	313	American Journal of Veterinary Research
821	AJVR Vol 79 No. 11	2017-11-14	2018-03-16	2018-11-01	122	352	American Journal of Veterinary Research
833	AJVR Vol 79 No. 10	2017-10-29	2018-01-09	2018-10-01	72	337	American Journal of Veterinary Research
846	AJVR Vol 79 No. 1	2017-02-09	2017-04-24	2018-01-01	74	326	American Journal of Veterinary Research
859	AJVR Vol 82 No. 9	2020-07-14	2020-11-23	2021-09-01	132	414	American Journal of Veterinary Research
1	10.3390/ani11020250	2020-12-03	2021-01-15	2021-01-20	43	48	Animals
2	10.3390/ani11020375	2020-12-30	2021-01-29	2021-02-02	30	34	Animals
31000	10.3390/ani11020490	2021-01-20	2021-02-08	2021-02-12	19	23	Animals
41000	10.3390/ani11020458	2020-12-14	2021-02-04	2021-02-09	52	57	Animals
5	10.3390/ani11020509	2020-12-30	2021-02-10	2021-02-16	42	48	Animals
6	10.3390/ani11020341	2020-11-03	2021-01-25	2021-01-29	83	87	Animals
7	10.3390/ani11020300	2020-12-07	2021-01-20	2021-01-25	44	49	Animals
8100	10.3390/ani11020495	2020-12-30	2021-02-09	2021-02-13	41	45	Animals
9	10.3390/ani11020271	2020-12-12	2021-01-19	2021-01-21	38	40	Animals
10	10.3390/ani11020496	2020-12-26	2021-02-09	2021-02-13	45	49	Animals
11100	10.3390/ani11020505	2020-12-24	2021-02-09	2021-02-15	47	53	Animals
12	10.3390/ani11020373	2020-12-18	2021-01-29	2021-02-02	42	46	Animals
13100	10.3390/ani11020450	2021-01-12	2021-02-07	2021-02-09	26	28	Animals
14	10.3390/ani11020382	2020-11-25	2021-01-30	2021-02-03	66	70	Animals
15	10.3390/ani11020328	2020-12-28	2021-01-19	2021-01-28	22	31	Animals
16100	10.3390/ani11020564	2021-01-13	2021-02-18	2021-02-22	36	40	Animals
17	10.3390/ani11020477	2020-12-11	2021-02-06	2021-02-11	57	62	Animals
18100	10.3390/ani11020451	2020-12-24	2021-02-02	2021-02-09	40	47	Animals
19100	10.3390/ani11020363	2020-12-24	2021-01-29	2021-02-01	36	39	Animals
20	10.3390/ani11020465	2020-12-31	2021-02-05	2021-02-09	36	40	Animals
21	10.3390/ani11020339	2020-12-16	2021-01-25	2021-01-29	40	44	Animals
22100	10.3390/ani11020398	2020-11-17	2021-01-30	2021-02-04	74	79	Animals
23	10.3390/ani11020576	2021-01-03	2021-02-18	2021-02-23	46	51	Animals
24	10.3390/ani11020260	2020-12-22	2021-01-19	2021-01-21	28	30	Animals
25100	10.3390/ani11020351	2021-01-21	2021-01-27	2021-01-30	6	9	Animals
26100	10.3390/ani11020522	2021-01-08	2021-02-15	2021-02-17	38	40	Animals
27	10.3390/ani11020456	2020-11-09	2021-01-29	2021-02-09	81	92	Animals
28100	10.3390/ani11020390	2020-12-18	2021-01-29	2021-02-03	42	47	Animals
29100	10.3390/ani11020515	2021-01-20	2021-02-12	2021-02-16	23	27	Animals
30	10.3390/ani11020523	2021-01-11	2021-02-13	2021-02-17	33	37	Animals
31100	10.3390/ani11020452	2020-12-28	2021-02-05	2021-02-09	39	43	Animals
32	10.3390/ani11020410	2020-11-23	2021-02-02	2021-02-05	71	74	Animals
33	10.3390/ani11020498	2021-01-28	2021-02-08	2021-02-14	11	17	Animals
34100	10.3390/ani11020512	2020-12-11	2021-02-07	2021-02-16	58	67	Animals
35100	10.3390/ani11020369	2020-12-16	2021-01-26	2021-02-02	41	48	Animals
36100	10.3390/ani11020542	2020-12-17	2021-02-08	2021-02-19	53	64	Animals
37100	10.3390/ani11020277	2020-12-18	2021-01-19	2021-01-22	32	35	Animals
38	10.3390/ani11020488	2021-01-19	2021-02-08	2021-02-12	20	24	Animals
39100	10.3390/ani11020436	2020-12-14	2021-02-03	2021-02-08	51	56	Animals
40	10.3390/ani11020583	2021-01-19	2021-02-18	2021-02-23	30	35	Animals
41100	10.3390/ani11020539	2020-12-31	2021-02-12	2021-02-19	43	50	Animals
42100	10.3390/ani11020270	2020-12-20	2021-01-18	2021-01-21	29	32	Animals
43100	10.3390/ani11020345	2020-12-29	2021-01-27	2021-01-29	29	31	Animals
44	10.3390/ani11020361	2020-11-26	2021-01-27	2021-02-01	62	67	Animals
45	10.3390/ani11020408	2020-12-01	2021-02-02	2021-02-05	63	66	Animals
46100	10.3390/ani11020397	2020-12-24	2021-02-01	2021-02-04	39	42	Animals
47	10.3390/ani11020358	2020-12-31	2021-01-27	2021-02-01	27	32	Animals
48100	10.3390/ani11020497	2021-01-22	2021-02-12	2021-02-14	21	23	Animals
49100	10.3390/ani11020325	2020-12-24	2021-01-21	2021-01-28	28	35	Animals
5087	10.3390/ani11020323	2020-12-18	2021-01-25	2021-01-28	38	41	Animals
51	10.3390/ani11020374	2020-12-07	2021-01-31	2021-02-02	55	57	Animals
5210	10.3390/ani11020485	2020-12-16	2021-02-08	2021-02-12	54	58	Animals
53	10.3390/ani11020519	2021-02-03	2021-02-13	2021-02-17	10	14	Animals
54	10.3390/ani11020387	2020-11-25	2021-01-28	2021-02-03	64	70	Animals
55	10.3390/ani11020529	2020-12-21	2021-02-13	2021-02-18	54	59	Animals
56	10.3390/ani11020303	2020-08-24	2021-01-13	2021-01-25	142	154	Animals
57	10.3390/ani11020253	2020-12-17	2021-01-18	2021-01-20	32	34	Animals
5810	10.3390/ani11020567	2020-12-25	2021-02-18	2021-02-22	55	59	Animals
5910	10.3390/ani11020348	2020-12-17	2021-01-27	2021-01-30	41	44	Animals
6010	10.3390/ani11020572	2021-01-23	2021-02-17	2021-02-22	25	30	Animals
6110	10.3390/ani11020411	2020-12-21	2021-02-03	2021-02-05	44	46	Animals
6210	10.3390/ani11020568	2021-01-16	2021-02-19	2021-02-22	34	37	Animals
6310	10.3390/ani11020353	2020-11-24	2021-01-26	2021-01-31	63	68	Animals
64	10.3390/ani11020437	2020-12-02	2021-01-29	2021-02-08	58	68	Animals
6510	10.3390/ani11020530	2020-12-17	2021-02-11	2021-02-18	56	63	Animals
6610	10.3390/ani11020310	2020-12-04	2021-01-22	2021-01-26	49	53	Animals
6710	10.3390/ani11020479	2020-11-13	2021-02-07	2021-02-11	86	90	Animals
6810	10.3390/ani11020364	2020-12-05	2021-01-27	2021-02-01	53	58	Animals
6910	10.3390/ani11020350	2020-12-31	2021-01-26	2021-01-30	26	30	Animals
7010	10.3390/ani11020457	2020-12-18	2021-02-03	2021-02-09	47	53	Animals
71	10.3390/ani11020440	2021-01-11	2021-02-02	2021-02-08	22	28	Animals
7210	10.3390/ani11020396	2021-01-14	2021-02-02	2021-02-04	19	21	Animals
7310	10.3390/ani11020278	2020-11-18	2021-01-19	2021-01-22	62	65	Animals
7410	10.3390/ani11020428	2020-11-11	2021-02-04	2021-02-07	85	88	Animals
75	10.3390/ani11020321	2020-11-09	2021-01-26	2021-01-28	78	80	Animals
7610	10.3390/ani11020471	2020-09-16	2021-02-04	2021-02-10	141	147	Animals
77	10.3390/ani11020268	2020-12-04	2021-01-18	2021-01-21	45	48	Animals
7810	10.3390/ani11020306	2020-11-24	2021-01-12	2021-01-26	49	63	Animals
79	10.3390/ani11020577	2021-01-07	2021-02-16	2021-02-23	40	47	Animals
8010	10.3390/ani11020561	2021-01-29	2021-02-19	2021-02-20	21	22	Animals
81	10.3390/ani11020292	2020-12-28	2021-01-19	2021-01-24	22	27	Animals
8210	10.3390/ani11020378	2021-01-06	2021-01-29	2021-02-02	23	27	Animals
83	10.3390/ani11020357	2021-01-06	2021-01-27	2021-02-01	21	26	Animals
8410	10.3390/ani11020392	2020-12-24	2021-01-26	2021-02-03	33	41	Animals
85	10.3390/ani11020508	2021-01-04	2021-02-13	2021-02-16	40	43	Animals
86	10.3390/ani11020503	2020-12-13	2021-02-11	2021-02-15	60	64	Animals
8710	10.3390/ani11020383	2020-12-07	2021-01-29	2021-02-03	53	58	Animals
8810	10.3390/ani11020309	2020-12-10	2021-01-20	2021-01-26	41	47	Animals
8910	10.3390/ani11020246	2020-11-06	2021-01-15	2021-01-20	70	75	Animals
90	10.3390/ani11020504	2021-01-22	2021-02-10	2021-02-15	19	24	Animals
91	10.3390/ani11020360	2020-11-29	2021-01-28	2021-02-01	60	64	Animals
92	10.3390/ani11020482	2020-12-18	2021-02-05	2021-02-11	49	55	Animals
9310	10.3390/ani11020486	2020-12-29	2021-02-04	2021-02-12	37	45	Animals
9410	10.3390/ani11020441	2020-12-16	2021-01-28	2021-02-08	43	54	Animals
9510	10.3390/ani11020329	2020-12-23	2021-01-23	2021-01-28	31	36	Animals
96	10.3390/ani11020355	2020-12-30	2021-01-28	2021-01-31	29	32	Animals
9710	10.3390/ani11020297	2020-11-10	2021-01-21	2021-01-25	72	76	Animals
9810	10.3390/ani11020569	2020-12-30	2021-02-15	2021-02-22	47	54	Animals
9910	10.3390/ani11020265	2020-12-09	2021-01-14	2021-01-21	36	43	Animals
100	10.3390/ani11020269	2020-12-08	2021-01-18	2021-01-21	41	44	Animals
101	10.3390/ani11020243	2020-12-21	2021-01-16	2021-01-20	26	30	Animals
102	10.3390/ani11020254	2021-01-05	2021-01-15	2021-01-20	10	15	Animals
10310	10.3390/ani11020494	2021-01-18	2021-02-09	2021-02-13	22	26	Animals
104	10.3390/ani11020412	2020-10-30	2021-02-02	2021-02-05	95	98	Animals
10510	10.3390/ani11020247	2020-11-16	2021-01-18	2021-01-20	63	65	Animals
106	10.3390/ani11020447	2021-01-04	2021-02-04	2021-02-09	31	36	Animals
107	10.3390/ani11020500	2020-11-26	2021-02-10	2021-02-15	76	81	Animals
10810	10.3390/ani11020468	2021-01-12	2021-02-08	2021-02-10	27	29	Animals
109	10.3390/ani11020528	2020-12-29	2021-02-13	2021-02-18	46	51	Animals
110	10.3390/ani11020427	2020-11-30	2021-02-03	2021-02-07	65	69	Animals
111	10.3390/ani11020273	2020-12-30	2021-01-19	2021-01-21	20	22	Animals
11210	10.3390/ani11020417	2020-12-16	2021-02-01	2021-02-06	47	52	Animals
11310	10.3390/ani11020462	2020-12-17	2021-02-05	2021-02-09	50	54	Animals
114	10.3390/ani11020259	2020-12-08	2021-01-18	2021-01-21	41	44	Animals
11510	10.3390/ani11020547	2021-01-12	2021-02-12	2021-02-19	31	38	Animals
116	10.3390/ani11020267	2020-12-18	2021-01-19	2021-01-21	32	34	Animals
117	10.3390/ani11020513	2021-01-27	2021-02-12	2021-02-16	16	20	Animals
118	10.3390/ani11020288	2020-12-21	2021-01-21	2021-01-23	31	33	Animals
119	10.3390/ani11020516	2021-01-15	2021-02-03	2021-02-17	19	33	Animals
120	10.3390/ani11020563	2021-01-12	2021-02-15	2021-02-21	34	40	Animals
121	10.3390/ani11020304	2020-12-22	2021-01-20	2021-01-25	29	34	Animals
122	10.3390/ani11020553	2020-12-18	2021-02-16	2021-02-20	60	64	Animals
123	10.3390/ani11020431	2020-12-23	2021-01-30	2021-02-07	38	46	Animals
12410	10.3390/ani11020543	2020-12-16	2021-02-16	2021-02-19	62	65	Animals
12510	10.3390/ani11020244	2020-10-24	2021-01-05	2021-01-20	73	88	Animals
12610	10.3390/ani11020510	2020-12-22	2021-02-12	2021-02-16	52	56	Animals
127	10.3390/ani11020362	2020-12-29	2021-01-25	2021-02-01	27	34	Animals
12810	10.3390/ani11020322	2021-01-04	2021-01-25	2021-01-28	21	24	Animals
129	10.3390/ani11020336	2020-12-19	2021-01-21	2021-01-29	33	41	Animals
13010	10.3390/ani11020299	2021-01-07	2021-01-21	2021-01-25	14	18	Animals
131	10.3390/ani11020473	2020-12-06	2021-02-06	2021-02-10	62	66	Animals
13210	10.3390/ani11020289	2020-12-31	2021-01-20	2021-01-24	20	24	Animals
133	10.3390/ani11020545	2021-01-29	2021-02-15	2021-02-19	17	21	Animals
13410	10.3390/ani11020275	2020-12-17	2021-01-19	2021-01-22	33	36	Animals
135	10.3390/ani11020467	2020-12-30	2021-02-05	2021-02-10	37	42	Animals
13610	10.3390/ani11020248	2020-12-19	2021-01-19	2021-01-20	31	32	Animals
137	10.3390/ani11020511	2021-01-12	2021-02-09	2021-02-16	28	35	Animals
138	10.3390/ani11020415	2020-12-15	2021-02-03	2021-02-06	50	53	Animals
13910	10.3390/ani11020555	2020-12-30	2021-02-16	2021-02-20	48	52	Animals
14010	10.3390/ani11020332	2020-12-21	2021-01-05	2021-01-28	15	38	Animals
14110	10.3390/ani11020559	2021-01-25	2021-02-17	2021-02-20	23	26	Animals
14210	10.3390/ani11020344	2020-11-26	2021-01-26	2021-01-29	61	64	Animals
14310	10.3390/ani11020474	2021-01-11	2021-02-05	2021-02-10	25	30	Animals
14410	10.3390/ani11020430	2020-12-01	2021-01-29	2021-02-07	59	68	Animals
14510	10.3390/ani11020525	2020-12-31	2021-02-15	2021-02-18	46	49	Animals
146	10.3390/ani11020391	2021-01-25	2021-01-31	2021-02-03	6	9	Animals
147	10.3390/ani11020347	2020-12-23	2021-01-25	2021-01-29	33	37	Animals
148	10.3390/ani11020385	2020-12-03	2021-01-29	2021-02-03	57	62	Animals
149	10.3390/ani11020455	2020-12-29	2021-02-04	2021-02-09	37	42	Animals
150	10.3390/ani11020526	2021-01-17	2021-02-13	2021-02-18	27	32	Animals
151	10.3390/ani11020484	2021-01-11	2021-02-10	2021-02-12	30	32	Animals
152	10.3390/ani11020386	2020-12-28	2021-01-29	2021-02-03	32	37	Animals
15310	10.3390/ani11020263	2020-12-29	2021-01-19	2021-01-21	21	23	Animals
15410	10.3390/ani11020291	2020-11-20	2021-01-20	2021-01-24	61	65	Animals
155	10.3390/ani11020335	2021-01-05	2021-01-26	2021-01-28	21	23	Animals
156	10.3390/ani11020406	2021-01-21	2021-02-02	2021-02-05	12	15	Animals
157	10.3390/ani11020507	2021-01-06	2021-02-13	2021-02-15	38	40	Animals
158	10.3390/ani11020453	2021-01-07	2021-02-04	2021-02-09	28	33	Animals
159	10.3390/ani11020249	2020-11-29	2021-01-15	2021-01-20	47	52	Animals
160	10.3390/ani11020470	2020-12-18	2021-02-08	2021-02-10	52	54	Animals
16110	10.3390/ani11020421	2020-12-29	2021-02-03	2021-02-06	36	39	Animals
162	10.3390/ani11020404	2020-11-25	2021-02-02	2021-02-05	69	72	Animals
163	10.3390/ani11020287	2020-12-17	2021-01-20	2021-01-23	34	37	Animals
16410	10.3390/ani11020423	2021-01-14	2021-02-03	2021-02-06	20	23	Animals
165	10.3390/ani11020562	2021-01-28	2021-02-18	2021-02-21	21	24	Animals
166	10.3390/ani11020438	2021-01-04	2021-02-02	2021-02-08	29	35	Animals
16710	10.3390/ani11020442	2021-01-21	2021-02-03	2021-02-08	13	18	Animals
16810	10.3390/ani11020574	2020-12-20	2021-02-18	2021-02-23	60	65	Animals
16910	10.3390/ani11020575	2021-01-08	2021-02-18	2021-02-23	41	46	Animals
17010	10.3390/ani11020286	2020-12-18	2021-01-15	2021-01-23	28	36	Animals
17110	10.3390/ani11020570	2021-01-14	2021-02-19	2021-02-22	36	39	Animals
172	10.3390/ani11020425	2021-01-13	2021-02-04	2021-02-06	22	24	Animals
17310	10.3390/ani11020480	2021-01-27	2021-02-08	2021-02-11	12	15	Animals
17410	10.3390/ani11020400	2021-01-04	2021-02-02	2021-02-05	29	32	Animals
175	10.3390/ani11020407	2020-12-29	2021-02-02	2021-02-05	35	38	Animals
17610	10.3390/ani11020533	2021-02-02	2021-02-14	2021-02-18	12	16	Animals
17710	10.3390/ani11020433	2020-12-31	2021-02-02	2021-02-07	33	38	Animals
178	10.3390/ani11020281	2020-10-14	2021-01-16	2021-01-22	94	100	Animals
17910	10.3390/ani11020499	2021-01-15	2021-02-11	2021-02-14	27	30	Animals
18010	10.3390/ani11020469	2021-01-25	2021-02-06	2021-02-10	12	16	Animals
18110	10.3390/ani11020307	2020-12-15	2021-01-22	2021-01-26	38	42	Animals
18210	10.3390/ani11020554	2021-01-17	2021-02-16	2021-02-20	30	34	Animals
18310	10.3390/ani11020366	2020-12-10	2021-01-29	2021-02-01	50	53	Animals
184	10.3390/ani11020571	2021-01-26	2021-02-18	2021-02-22	23	27	Animals
18510	10.3390/ani11020502	2020-12-08	2021-02-12	2021-02-15	66	69	Animals
186	10.3390/ani11020320	2020-11-24	2021-01-19	2021-01-27	56	64	Animals
187	10.3390/ani11020532	2021-02-03	2021-02-12	2021-02-18	9	15	Animals
18810	10.3390/ani11020290	2020-12-30	2021-01-22	2021-01-24	23	25	Animals
189	10.3390/ani11020413	2020-12-29	2021-01-30	2021-02-05	32	38	Animals
19010	10.3390/ani11020521	2021-01-29	2021-02-10	2021-02-17	12	19	Animals
191	10.3390/ani11020578	2021-01-21	2021-02-19	2021-02-23	29	33	Animals
192	10.3390/ani11020372	2020-12-11	2021-01-29	2021-02-02	49	53	Animals
19310	10.3390/ani11020573	2020-11-30	2021-01-26	2021-02-23	57	85	Animals
194	10.3390/ani11020483	2020-12-30	2021-02-03	2021-02-12	35	44	Animals
19510	10.3390/ani11020538	2021-01-18	2021-02-18	2021-02-19	31	32	Animals
19610	10.3390/ani11020527	2021-01-18	2021-02-16	2021-02-18	29	31	Animals
19710	10.3390/ani11020443	2020-12-23	2021-02-04	2021-02-08	43	47	Animals
19810	10.3390/ani11020283	2020-12-02	2021-01-19	2021-01-23	48	52	Animals
19910	10.3390/ani11020560	2020-12-22	2021-02-15	2021-02-20	55	60	Animals
20010	10.3390/ani11020295	2020-12-04	2021-01-21	2021-01-24	48	51	Animals
201	10.3390/ani11020294	2020-12-08	2021-01-20	2021-01-24	43	47	Animals
202	10.3390/ani11020558	2021-01-16	2021-02-16	2021-02-20	31	35	Animals
203	10.3390/ani11020327	2020-12-10	2021-01-19	2021-01-28	40	49	Animals
20410	10.3390/ani11020334	2020-12-06	2021-01-26	2021-01-28	51	53	Animals
20510	10.3390/ani11020354	2020-11-18	2021-01-28	2021-01-31	71	74	Animals
206	10.3390/ani11020376	2021-01-08	2021-01-31	2021-02-02	23	25	Animals
20710	10.3390/ani11020274	2020-11-11	2021-01-11	2021-01-22	61	72	Animals
208	10.3390/ani11020272	2020-10-25	2021-01-19	2021-01-21	86	88	Animals
209	10.3390/ani11020365	2021-01-05	2021-01-28	2021-02-01	23	27	Animals
21010	10.3390/ani11020579	2021-01-19	2021-02-18	2021-02-23	30	35	Animals
211	10.3390/ani11020330	2021-01-04	2021-01-25	2021-01-28	21	24	Animals
212	10.3390/ani11020556	2021-01-20	2021-02-17	2021-02-20	28	31	Animals
21310	10.3390/ani11020316	2021-01-08	2021-01-24	2021-01-27	16	19	Animals
21410	10.3390/ani11020491	2020-12-11	2021-02-03	2021-02-13	54	64	Animals
21510	10.3390/ani11020256	2020-12-28	2021-01-18	2021-01-20	21	23	Animals
216	10.3390/ani11020478	2021-01-09	2021-02-03	2021-02-11	25	33	Animals
217	10.3390/ani11020557	2020-12-11	2021-01-29	2021-02-20	49	71	Animals
21810	10.3390/ani11020420	2020-12-23	2021-02-02	2021-02-06	41	45	Animals
21910	10.3390/ani11020517	2021-01-11	2021-02-14	2021-02-17	34	37	Animals
220	10.3390/ani11020359	2021-01-08	2021-01-30	2021-02-01	22	24	Animals
221	10.3390/ani11020551	2021-01-16	2021-02-17	2021-02-20	32	35	Animals
22210	10.3390/ani11020432	2021-01-08	2021-02-02	2021-02-07	25	30	Animals
223	10.3390/ani11020448	2021-01-07	2021-02-05	2021-02-09	29	33	Animals
22410	10.3390/ani11020540	2021-02-05	2021-02-17	2021-02-19	12	14	Animals
225	10.3390/ani11020324	2020-12-30	2021-01-25	2021-01-28	26	29	Animals
22610	10.3390/ani11020319	2020-12-28	2021-01-21	2021-01-27	24	30	Animals
227	10.3390/ani11020367	2020-12-17	2021-01-28	2021-02-01	42	46	Animals
228	10.3390/ani11020492	2020-12-28	2021-02-11	2021-02-13	45	47	Animals
229	10.3390/ani11020379	2020-12-15	2021-01-28	2021-02-02	44	49	Animals
23010	10.3390/ani11020506	2021-01-05	2021-02-11	2021-02-15	37	41	Animals
23110	10.3390/ani11020349	2021-01-18	2021-01-28	2021-01-30	10	12	Animals
232	10.3390/ani11020566	2021-01-18	2021-02-18	2021-02-22	31	35	Animals
233	10.3390/ani11020493	2020-12-13	2021-02-01	2021-02-13	50	62	Animals
234	10.3390/ani11020487	2020-12-18	2021-02-05	2021-02-12	49	56	Animals
23510	10.3390/ani11020524	2020-09-30	2021-02-15	2021-02-18	138	141	Animals
23610	10.3390/ani11020312	2020-12-17	2021-01-19	2021-01-26	33	40	Animals
23710	10.3390/ani11020257	2020-12-09	2021-01-18	2021-01-20	40	42	Animals
23810	10.3390/ani11020389	2020-12-31	2021-01-30	2021-02-03	30	34	Animals
23910	10.3390/ani11020370	2020-12-28	2021-01-29	2021-02-02	32	36	Animals
24010	10.3390/ani11020261	2020-12-22	2021-01-19	2021-01-21	28	30	Animals
24110	10.3390/ani11020266	2020-12-17	2021-01-18	2021-01-21	32	35	Animals
24210	10.3390/ani11020546	2021-01-07	2021-02-16	2021-02-19	40	43	Animals
24310	10.3390/ani11020315	2020-12-16	2021-01-23	2021-01-27	38	42	Animals
244	10.3390/ani11020264	2020-11-17	2021-01-19	2021-01-21	63	65	Animals
24510	10.3390/ani11020419	2021-01-11	2021-02-01	2021-02-06	21	26	Animals
24610	10.3390/ani11020416	2021-01-18	2021-02-03	2021-02-06	16	19	Animals
24710	10.3390/ani11020409	2020-11-23	2021-01-31	2021-02-05	69	74	Animals
24810	10.3390/ani11020459	2020-12-22	2021-02-04	2021-02-09	44	49	Animals
249	10.3390/ani11020445	2020-12-31	2021-02-03	2021-02-08	34	39	Animals
25010	10.3390/ani11020541	2021-01-19	2021-02-12	2021-02-19	24	31	Animals
25110	10.3390/ani11020326	2020-12-23	2021-01-19	2021-01-28	27	36	Animals
25210	10.3390/ani11020314	2021-01-04	2021-01-23	2021-01-27	19	23	Animals
253	10.3390/ani11020255	2020-10-20	2021-01-16	2021-01-20	88	92	Animals
25410	10.3390/ani11020331	2020-11-22	2021-01-25	2021-01-28	64	67	Animals
25510	10.3390/ani11020284	2020-12-08	2021-01-21	2021-01-23	44	46	Animals
256	10.3390/ani11020262	2020-12-20	2021-01-19	2021-01-21	30	32	Animals
257	10.3390/ani11020535	2021-01-11	2021-02-04	2021-02-19	24	39	Animals
258	10.3390/ani11020251	2020-12-24	2021-01-16	2021-01-20	23	27	Animals
25910	10.3390/ani11020481	2021-01-20	2021-02-08	2021-02-11	19	22	Animals
26010	10.3390/ani11020449	2021-01-11	2021-02-05	2021-02-09	25	29	Animals
26110	10.3390/ani11020308	2020-12-02	2021-01-22	2021-01-26	51	55	Animals
26210	10.3390/ani11020426	2021-01-26	2021-02-02	2021-02-07	7	12	Animals
263	10.3390/ani11020346	2020-12-31	2021-01-27	2021-01-29	27	29	Animals
26410	10.3390/ani11020475	2020-12-10	2021-02-05	2021-02-11	57	63	Animals
265	10.3390/ani11020537	2021-01-04	2021-02-17	2021-02-19	44	46	Animals
26610	10.3390/ani11020584	2021-01-15	2021-02-20	2021-02-23	36	39	Animals
267	10.3390/ani11020311	2020-12-15	2021-01-22	2021-01-26	38	42	Animals
26810	10.3390/ani11020565	2021-01-12	2021-02-18	2021-02-22	37	41	Animals
269	10.3390/ani11020581	2021-01-03	2021-02-15	2021-02-23	43	51	Animals
27010	10.3390/ani11020446	2021-01-10	2021-02-02	2021-02-08	23	29	Animals
27110	10.3390/ani11020293	2020-12-22	2021-01-21	2021-01-24	30	33	Animals
27210	10.3390/ani11020454	2020-12-30	2021-02-05	2021-02-09	37	41	Animals
27310	10.3390/ani11020489	2020-11-09	2021-02-04	2021-02-12	87	95	Animals
27410	10.3390/ani11020424	2020-12-18	2021-02-01	2021-02-06	45	50	Animals
275	10.3390/ani11020439	2020-12-08	2021-02-02	2021-02-08	56	62	Animals
27610	10.3390/ani11020520	2020-12-15	2021-02-11	2021-02-17	58	64	Animals
277	10.3390/ani11020285	2020-12-21	2021-01-20	2021-01-23	30	33	Animals
278	10.3390/ani11020476	2020-12-11	2021-02-07	2021-02-11	58	62	Animals
27910	10.3390/ani11020333	2020-11-13	2021-01-25	2021-01-28	73	76	Animals
28010	10.3390/ani11020298	2020-12-15	2021-01-14	2021-01-25	30	41	Animals
281	10.3390/ani11020429	2021-01-14	2021-02-05	2021-02-07	22	24	Animals
28210	10.3390/ani11010058	2020-11-30	2020-12-23	2020-12-31	23	31	Animals
28310	10.3390/ani11010063	2020-11-30	2020-12-27	2020-12-31	27	31	Animals
28410	10.3390/ani11010212	2020-11-30	2021-01-12	2021-01-16	43	47	Animals
285	10.3390/ani11010164	2020-12-18	2021-01-09	2021-01-12	22	25	Animals
28610	10.3390/ani11010231	2020-11-17	2021-01-13	2021-01-18	57	62	Animals
28710	10.3390/ani11010121	2020-11-23	2021-01-05	2021-01-08	43	46	Animals
28810	10.3390/ani11010027	2020-11-03	2020-12-21	2020-12-25	48	52	Animals
28910	10.3390/ani11010005	2020-11-20	2020-12-18	2020-12-22	28	32	Animals
290	10.3390/ani11010142	2020-11-23	2021-01-07	2021-01-11	45	49	Animals
291	10.3390/ani11010168	2020-11-20	2021-01-08	2021-01-12	49	53	Animals
292	10.3390/ani11010140	2020-10-17	2021-01-06	2021-01-11	81	86	Animals
293	10.3390/ani11010215	2020-11-30	2021-01-15	2021-01-17	46	48	Animals
294	10.3390/ani11010129	2020-12-03	2021-01-06	2021-01-08	34	36	Animals
29510	10.3390/ani11010220	2020-11-26	2021-01-15	2021-01-18	50	53	Animals
29610	10.3390/ani11010113	2020-12-11	2020-12-29	2021-01-07	18	27	Animals
29710	10.3390/ani11010127	2020-12-24	2021-01-07	2021-01-08	14	15	Animals
298	10.3390/ani11010001	2020-11-22	2020-12-16	2020-12-22	24	30	Animals
299	10.3390/ani11010091	2020-12-01	2021-01-05	2021-01-06	35	36	Animals
30010	10.3390/ani11010136	2020-12-22	2021-01-08	2021-01-10	17	19	Animals
30110	10.3390/ani11010051	2020-11-08	2020-12-23	2020-12-29	45	51	Animals
30210	10.3390/ani11010023	2020-10-27	2020-12-21	2020-12-25	55	59	Animals
303	10.3390/ani11010224	2020-12-07	2021-01-14	2021-01-18	38	42	Animals
30410	10.3390/ani11010221	2020-11-16	2021-01-14	2021-01-18	59	63	Animals
305	10.3390/ani11010135	2020-11-26	2021-01-07	2021-01-10	42	45	Animals
30610	10.3390/ani11010209	2020-12-16	2021-01-13	2021-01-16	28	31	Animals
30710	10.3390/ani11010038	2020-11-27	2020-12-24	2020-12-27	27	30	Animals
308	10.3390/ani11010242	2020-11-02	2020-12-11	2021-01-19	39	78	Animals
30910	10.3390/ani11010184	2020-12-18	2021-01-07	2021-01-14	20	27	Animals
31010	10.3390/ani11010189	2020-11-19	2021-01-11	2021-01-14	53	56	Animals
31110	10.3390/ani11010053	2020-12-05	2020-12-21	2020-12-30	16	25	Animals
31210	10.3390/ani11010089	2020-11-01	2020-12-29	2021-01-05	58	65	Animals
31310	10.3390/ani11010032	2020-11-25	2020-12-23	2020-12-26	28	31	Animals
314	10.3390/ani11010141	2020-11-21	2021-01-07	2021-01-11	47	51	Animals
31510	10.3390/ani11010110	2020-10-20	2020-12-30	2021-01-07	71	79	Animals
31610	10.3390/ani11010239	2020-11-26	2021-01-12	2021-01-19	47	54	Animals
317	10.3390/ani11010049	2020-11-08	2020-12-25	2020-12-29	47	51	Animals
318	10.3390/ani11010057	2020-12-10	2020-12-28	2020-12-30	18	20	Animals
31910	10.3390/ani11010211	2020-11-17	2021-01-12	2021-01-16	56	60	Animals
32010	10.3390/ani11010070	2020-11-17	2020-12-30	2021-01-02	43	46	Animals
321	10.3390/ani11010123	2020-12-10	2021-01-06	2021-01-08	27	29	Animals
32210	10.3390/ani11010104	2020-11-13	2021-01-04	2021-01-06	52	54	Animals
32310	10.3390/ani11010149	2020-12-05	2021-01-07	2021-01-11	33	37	Animals
32410	10.3390/ani11010156	2020-10-27	2021-01-08	2021-01-12	73	77	Animals
325	10.3390/ani11010021	2020-10-31	2020-12-21	2020-12-24	51	54	Animals
32610	10.3390/ani11010102	2020-12-07	2021-01-04	2021-01-06	28	30	Animals
327	10.3390/ani11010064	2020-11-11	2020-12-27	2020-12-31	46	50	Animals
328	10.3390/ani11010008	2020-11-24	2020-12-20	2020-12-23	26	29	Animals
32910	10.3390/ani11010097	2020-11-19	2021-01-02	2021-01-06	44	48	Animals
330	10.3390/ani11010043	2020-10-13	2020-12-24	2020-12-28	72	76	Animals
33110	10.3390/ani11010041	2020-10-30	2020-12-18	2020-12-28	49	59	Animals
33210	10.3390/ani11010025	2020-10-20	2020-12-21	2020-12-25	62	66	Animals
333	10.3390/ani11010151	2020-11-05	2021-01-10	2021-01-11	66	67	Animals
33410	10.3390/ani11010208	2020-11-23	2021-01-14	2021-01-16	52	54	Animals
335	10.3390/ani11010010	2020-12-05	2020-12-21	2020-12-23	16	18	Animals
336	10.3390/ani11010180	2020-12-10	2021-01-11	2021-01-14	32	35	Animals
337	10.3390/ani11010130	2020-11-16	2021-01-05	2021-01-08	50	53	Animals
33810	10.3390/ani11010198	2020-12-24	2021-01-13	2021-01-15	20	22	Animals
33910	10.3390/ani11010002	2020-12-04	2020-12-18	2020-12-22	14	18	Animals
340	10.3390/ani11010099	2020-11-30	2021-01-01	2021-01-06	32	37	Animals
341	10.3390/ani11010173	2020-11-28	2021-01-10	2021-01-13	43	46	Animals
342	10.3390/ani11010201	2020-11-16	2021-01-12	2021-01-15	57	60	Animals
343	10.3390/ani11010122	2020-10-16	2021-01-05	2021-01-08	81	84	Animals
344	10.3390/ani11010161	2020-12-04	2021-01-09	2021-01-12	36	39	Animals
34510	10.3390/ani11010022	2020-11-09	2020-12-21	2020-12-24	42	45	Animals
346	10.3390/ani11010146	2020-12-08	2021-01-05	2021-01-11	28	34	Animals
347	10.3390/ani11010178	2020-11-10	2021-01-07	2021-01-14	58	65	Animals
348	10.3390/ani11010174	2020-11-02	2021-01-06	2021-01-13	65	72	Animals
34910	10.3390/ani11010232	2020-12-17	2021-01-13	2021-01-18	27	32	Animals
35010	10.3390/ani11010124	2020-11-01	2021-01-05	2021-01-08	65	68	Animals
35110	10.3390/ani11010228	2020-12-30	2021-01-15	2021-01-18	16	19	Animals
35210	10.3390/ani11010210	2020-11-18	2021-01-12	2021-01-16	55	59	Animals
353	10.3390/ani11010213	2020-12-04	2021-01-11	2021-01-16	38	43	Animals
35410	10.3390/ani11010117	2020-11-15	2021-01-04	2021-01-08	50	54	Animals
35510	10.3390/ani11010052	2020-11-05	2020-12-24	2020-12-30	49	55	Animals
35610	10.3390/ani11010082	2020-12-02	2020-12-30	2021-01-05	28	34	Animals
357	10.3390/ani11010111	2020-11-29	2021-01-05	2021-01-07	37	39	Animals
35810	10.3390/ani11010017	2020-10-27	2020-12-18	2020-12-24	52	58	Animals
359	10.3390/ani11010044	2020-11-21	2020-12-23	2020-12-28	32	37	Animals
360	10.3390/ani11010150	2020-12-10	2021-01-05	2021-01-11	26	32	Animals
36110	10.3390/ani11010085	2020-11-13	2020-12-29	2021-01-05	46	53	Animals
362	10.3390/ani11010055	2020-11-18	2020-12-25	2020-12-30	37	42	Animals
363	10.3390/ani11010240	2020-11-18	2021-01-14	2021-01-19	57	62	Animals
36410	10.3390/ani11010163	2020-11-30	2020-12-21	2021-01-12	21	43	Animals
36510	10.3390/ani11010033	2020-11-24	2020-12-23	2020-12-26	29	32	Animals
366	10.3390/ani11010056	2020-11-05	2020-12-24	2020-12-30	49	55	Animals
36710	10.3390/ani11010019	2020-10-26	2020-12-22	2020-12-24	57	59	Animals
36810	10.3390/ani11010020	2020-12-07	2020-12-21	2020-12-24	14	17	Animals
369	10.3390/ani11010048	2020-11-02	2020-12-21	2020-12-29	49	57	Animals
370	10.3390/ani11010036	2020-12-07	2020-12-24	2020-12-27	17	20	Animals
371	10.3390/ani11010086	2020-11-24	2020-12-31	2021-01-05	37	42	Animals
37210	10.3390/ani11010153	2020-11-27	2021-01-07	2021-01-11	41	45	Animals
373	10.3390/ani11010072	2020-10-10	2020-12-18	2021-01-02	69	84	Animals
37410	10.3390/ani11010066	2020-12-04	2020-12-25	2020-12-31	21	27	Animals
375	10.3390/ani11010203	2020-11-24	2021-01-14	2021-01-15	51	52	Animals
37610	10.3390/ani11010004	2020-10-30	2020-12-18	2020-12-22	49	53	Animals
37710	10.3390/ani11010075	2020-11-07	2020-12-30	2021-01-04	53	58	Animals
37810	10.3390/ani11010128	2020-11-16	2020-12-29	2021-01-08	43	53	Animals
37910	10.3390/ani11010202	2020-12-16	2021-01-13	2021-01-15	28	30	Animals
380	10.3390/ani11010067	2020-11-11	2020-12-21	2021-01-01	40	51	Animals
381	10.3390/ani11010197	2020-11-27	2021-01-11	2021-01-15	45	49	Animals
38210	10.3390/ani11010159	2020-12-08	2021-01-08	2021-01-12	31	35	Animals
38310	10.3390/ani11010042	2020-10-16	2020-12-17	2020-12-28	62	73	Animals
38410	10.3390/ani11010120	2020-11-09	2020-12-31	2021-01-08	52	60	Animals
385	10.3390/ani11010167	2020-11-23	2021-01-09	2021-01-12	47	50	Animals
38610	10.3390/ani11010155	2020-12-03	2021-01-07	2021-01-11	35	39	Animals
38710	10.3390/ani11010062	2020-11-30	2020-12-22	2020-12-31	22	31	Animals
38810	10.3390/ani11010118	2020-12-06	2021-01-04	2021-01-08	29	33	Animals
389	10.3390/ani11010083	2020-11-20	2020-12-29	2021-01-05	39	46	Animals
39010	10.3390/ani11010024	2020-11-30	2020-12-18	2020-12-25	18	25	Animals
39110	10.3390/ani11010241	2020-12-21	2021-01-15	2021-01-19	25	29	Animals
39210	10.3390/ani11010154	2020-11-18	2021-01-07	2021-01-11	50	54	Animals
39310	10.3390/ani11010026	2020-11-18	2020-12-24	2020-12-25	36	37	Animals
39410	10.3390/ani11010013	2020-12-04	2020-12-18	2020-12-23	14	19	Animals
39510	10.3390/ani11010059	2020-11-10	2020-12-28	2020-12-30	48	50	Animals
39610	10.3390/ani11010186	2020-11-30	2021-01-11	2021-01-14	42	45	Animals
397	10.3390/ani11010193	2020-12-08	2021-01-11	2021-01-15	34	38	Animals
39810	10.3390/ani11010236	2020-12-17	2021-01-15	2021-01-19	29	33	Animals
39910	10.3390/ani11010145	2020-11-26	2021-01-06	2021-01-11	41	46	Animals
400	10.3390/ani11010090	2020-11-26	2020-12-31	2021-01-05	35	40	Animals
40110	10.3390/ani11010108	2020-10-22	2021-01-04	2021-01-07	74	77	Animals
40210	10.3390/ani11010200	2020-11-18	2021-01-13	2021-01-15	56	58	Animals
403	10.3390/ani11010152	2020-12-01	2021-01-05	2021-01-11	35	41	Animals
40410	10.3390/ani11010144	2020-12-15	2021-01-07	2021-01-11	23	27	Animals
40510	10.3390/ani11010157	2020-12-07	2021-01-06	2021-01-12	30	36	Animals
406	10.3390/ani11010068	2020-12-15	2020-12-28	2021-01-01	13	17	Animals
40710	10.3390/ani11010192	2020-11-03	2021-01-11	2021-01-15	69	73	Animals
408	10.3390/ani11010131	2020-11-30	2021-01-05	2021-01-08	36	39	Animals
40910	10.3390/ani11010003	2020-11-09	2020-12-10	2020-12-22	31	43	Animals
41010	10.3390/ani11010222	2020-12-28	2021-01-13	2021-01-18	16	21	Animals
411	10.3390/ani11010096	2020-10-28	2020-12-21	2021-01-06	54	70	Animals
412	10.3390/ani11010187	2020-11-17	2021-01-11	2021-01-14	55	58	Animals
41310	10.3390/ani11010015	2020-11-09	2020-12-18	2020-12-24	39	45	Animals
41410	10.3390/ani11010139	2020-10-22	2021-01-08	2021-01-11	78	81	Animals
41510	10.3390/ani11010031	2020-11-25	2020-12-21	2020-12-26	26	31	Animals
41610	10.3390/ani11010223	2020-12-20	2021-01-15	2021-01-18	26	29	Animals
41710	10.3390/ani11010098	2020-12-02	2021-01-02	2021-01-06	31	35	Animals
418	10.3390/ani11010134	2020-12-17	2021-01-05	2021-01-09	19	23	Animals
419	10.3390/ani11010103	2020-12-15	2021-01-03	2021-01-06	19	22	Animals
420	10.3390/ani11010076	2020-11-09	2020-12-30	2021-01-04	51	56	Animals
42110	10.3390/ani11010095	2020-11-28	2021-01-04	2021-01-06	37	39	Animals
42210	10.3390/ani11010169	2020-12-14	2021-01-09	2021-01-12	26	29	Animals
42310	10.3390/ani11010100	2020-12-01	2021-01-03	2021-01-06	33	36	Animals
42410	10.3390/ani11010074	2020-11-25	2020-12-28	2021-01-03	33	39	Animals
425	10.3390/ani11010084	2020-10-16	2020-12-23	2021-01-05	68	81	Animals
42610	10.3390/ani11010214	2020-12-01	2021-01-14	2021-01-16	44	46	Animals
42710	10.3390/ani11010179	2020-12-07	2021-01-08	2021-01-14	32	38	Animals
428	10.3390/ani11010077	2020-11-26	2020-12-29	2021-01-04	33	39	Animals
42910	10.3390/ani11010081	2020-10-11	2020-12-31	2021-01-05	81	86	Animals
43010	10.3390/ani11010188	2020-11-30	2021-01-13	2021-01-14	44	45	Animals
431	10.3390/ani11010183	2020-12-07	2021-01-11	2021-01-14	35	38	Animals
432	10.3390/ani11010165	2020-12-03	2021-01-10	2021-01-12	38	40	Animals
43310	10.3390/ani11010207	2020-12-06	2021-01-14	2021-01-16	39	41	Animals
43410	10.3390/ani11010205	2020-11-19	2021-01-13	2021-01-15	55	57	Animals
43510	10.3390/ani11010029	2020-10-08	2020-12-11	2020-12-26	64	79	Animals
436	10.3390/ani11010034	2020-11-26	2020-12-23	2020-12-26	27	30	Animals
43710	10.3390/ani11010080	2020-10-29	2020-12-30	2021-01-05	62	68	Animals
438	10.3390/ani11010007	2020-11-09	2020-12-17	2020-12-23	38	44	Animals
43910	10.3390/ani11010088	2020-12-04	2020-12-30	2021-01-05	26	32	Animals
44010	10.3390/ani11010176	2020-10-09	2020-11-14	2021-01-13	36	96	Animals
44110	10.3390/ani11010185	2020-12-01	2021-01-07	2021-01-14	37	44	Animals
442	10.3390/ani11010112	2020-11-25	2021-01-05	2021-01-07	41	43	Animals
443	10.3390/ani11010035	2020-09-21	2020-12-22	2020-12-26	92	96	Animals
444	10.3390/ani11010172	2020-07-05	2020-08-07	2021-01-13	33	192	Animals
44510	10.3390/ani11010106	2020-12-11	2021-01-04	2021-01-07	24	27	Animals
44610	10.3390/ani11010018	2020-11-25	2020-12-21	2020-12-24	26	29	Animals
447	10.3390/ani11010079	2020-11-13	2020-12-26	2021-01-04	43	52	Animals
448	10.3390/ani11010162	2020-11-13	2021-01-10	2021-01-12	58	60	Animals
449	10.3390/ani11010073	2020-11-26	2020-12-29	2021-01-03	33	38	Animals
45010	10.3390/ani11010109	2020-10-24	2020-11-13	2021-01-07	20	75	Animals
451	10.3390/ani11010009	2020-11-17	2020-12-18	2020-12-23	31	36	Animals
452	10.3390/ani11010225	2020-12-01	2021-01-14	2021-01-18	44	48	Animals
45310	10.3390/ani11010101	2020-12-18	2020-12-31	2021-01-06	13	19	Animals
454	10.3390/ani11010094	2020-11-19	2020-12-31	2021-01-06	42	48	Animals
45510	10.3390/ani11010119	2020-12-01	2021-01-05	2021-01-08	35	38	Animals
456	10.3390/ani11010194	2020-12-27	2021-01-13	2021-01-15	17	19	Animals
457	10.3390/ani11010147	2020-11-26	2021-01-08	2021-01-11	43	46	Animals
45810	10.3390/ani11010014	2020-12-04	2020-12-21	2020-12-23	17	19	Animals
459	10.3390/ani11010045	2020-10-20	2020-12-23	2020-12-29	64	70	Animals
46010	10.3390/ani11010050	2020-09-24	2020-12-20	2020-12-29	87	96	Animals
46110	10.3390/ani11010069	2020-11-25	2020-12-28	2021-01-01	33	37	Animals
462	10.3390/ani11010235	2020-12-11	2021-01-13	2021-01-19	33	39	Animals
463	10.3390/ani11010190	2020-12-07	2021-01-12	2021-01-14	36	38	Animals
46410	10.3390/ani11010230	2020-12-02	2021-01-15	2021-01-18	44	47	Animals
465	10.3390/ani11010238	2020-11-27	2021-01-14	2021-01-19	48	53	Animals
466	10.3390/ani11010177	2020-12-18	2021-01-11	2021-01-13	24	26	Animals
46710	10.3390/ani11010011	2020-10-29	2020-12-22	2020-12-23	54	55	Animals
46810	10.3390/ani11010039	2020-12-02	2020-12-23	2020-12-27	21	25	Animals
469	10.3390/ani11010028	2020-11-20	2020-12-21	2020-12-26	31	36	Animals
47010	10.3390/ani11010137	2020-12-23	2021-01-08	2021-01-10	16	18	Animals
47110	10.3390/ani11010206	2020-11-24	2021-01-08	2021-01-15	45	52	Animals
472	10.3390/ani11010107	2020-12-07	2021-01-04	2021-01-07	28	31	Animals
47310	10.3390/ani11010133	2020-11-20	2021-01-07	2021-01-08	48	49	Animals
474	10.3390/ani11010166	2020-12-02	2021-01-04	2021-01-12	33	41	Animals
475	10.3390/ani11010132	2020-11-23	2021-01-06	2021-01-08	44	46	Animals
47610	10.3390/ani11010182	2020-12-02	2021-01-11	2021-01-14	40	43	Animals
47710	10.3390/ani11010227	2020-11-29	2021-01-14	2021-01-18	46	50	Animals
47810	10.3390/ani11010078	2020-11-27	2020-12-30	2021-01-04	33	38	Animals
47910	10.3390/ani11010126	2020-11-24	2021-01-06	2021-01-08	43	45	Animals
480	10.3390/ani11010233	2021-01-04	2021-01-12	2021-01-19	8	15	Animals
48110	10.3390/ani11010037	2020-11-27	2020-12-23	2020-12-27	26	30	Animals
482	10.3390/ani10122443	2020-11-13	2020-12-17	2020-12-20	34	37	Animals
48310	10.3390/ani10122349	2020-11-17	2020-12-08	2020-12-09	21	22	Animals
48410	10.3390/ani10122403	2020-11-23	2020-12-11	2020-12-15	18	22	Animals
48510	10.3390/ani10122200	2020-11-10	2020-11-21	2020-11-24	11	14	Animals
486	10.3390/ani10122234	2020-11-10	2020-11-20	2020-11-27	10	17	Animals
487	10.3390/ani10122396	2020-11-01	2020-12-04	2020-12-15	33	44	Animals
48810	10.3390/ani10122205	2020-10-09	2020-11-19	2020-11-25	41	47	Animals
489	10.3390/ani10122361	2020-11-24	2020-12-07	2020-12-10	13	16	Animals
49010	10.3390/ani10122266	2020-11-05	2020-11-29	2020-12-01	24	26	Animals
49110	10.3390/ani10122367	2020-10-29	2020-12-05	2020-12-10	37	42	Animals
49210	10.3390/ani10122341	2020-11-03	2020-11-29	2020-12-09	26	36	Animals
493	10.3390/ani10122364	2020-11-23	2020-12-09	2020-12-10	16	17	Animals
49410	10.3390/ani10122288	2020-10-09	2020-11-14	2020-12-03	36	55	Animals
495	10.3390/ani10122305	2020-10-28	2020-12-02	2020-12-05	35	38	Animals
496	10.3390/ani10122393	2020-11-19	2020-12-12	2020-12-15	23	26	Animals
497	10.3390/ani10122423	2020-10-26	2020-12-13	2020-12-17	48	52	Animals
498	10.3390/ani10122269	2020-10-02	2020-11-29	2020-12-01	58	60	Animals
499	10.3390/ani10122394	2020-11-20	2020-12-10	2020-12-15	20	25	Animals
50010	10.3390/ani10122419	2020-11-13	2020-12-14	2020-12-17	31	34	Animals
50110	10.3390/ani10122315	2020-11-19	2020-12-03	2020-12-07	14	18	Animals
50210	10.3390/ani10122436	2020-11-30	2020-12-17	2020-12-19	17	19	Animals
50310	10.3390/ani10122285	2020-11-12	2020-11-30	2020-12-03	18	21	Animals
50410	10.3390/ani10122319	2020-10-29	2020-12-05	2020-12-07	37	39	Animals
50510	10.3390/ani10122380	2020-11-06	2020-12-08	2020-12-11	32	35	Animals
506	10.3390/ani10122360	2020-09-25	2020-12-02	2020-12-10	68	76	Animals
50710	10.3390/ani10122248	2020-10-10	2020-11-27	2020-11-30	48	51	Animals
5088	10.3390/ani10122299	2020-10-19	2020-11-27	2020-12-04	39	46	Animals
5091	10.3390/ani10122291	2020-10-28	2020-11-17	2020-12-03	20	36	Animals
5101	10.3390/ani10122251	2020-10-10	2020-11-27	2020-11-30	48	51	Animals
5111	10.3390/ani10122321	2020-11-16	2020-12-03	2020-12-07	17	21	Animals
5121	10.3390/ani10122276	2020-10-23	2020-11-28	2020-12-02	36	40	Animals
513	10.3390/ani10122286	2020-09-15	2020-11-10	2020-12-03	56	79	Animals
5141	10.3390/ani10122354	2020-11-10	2020-12-04	2020-12-09	24	29	Animals
5151	10.3390/ani10122316	2020-10-20	2020-12-04	2020-12-07	45	48	Animals
5161	10.3390/ani10122284	2020-11-17	2020-12-02	2020-12-03	15	16	Animals
517	10.3390/ani10122222	2020-10-30	2020-11-23	2020-11-26	24	27	Animals
5181	10.3390/ani10122384	2020-11-05	2020-12-10	2020-12-12	35	37	Animals
519	10.3390/ani10122383	2020-11-04	2020-12-09	2020-12-11	35	37	Animals
5201	10.3390/ani10122451	2020-11-21	2020-12-15	2020-12-21	24	30	Animals
521	10.3390/ani10122348	2020-10-10	2020-11-20	2020-12-09	41	60	Animals
5221	10.3390/ani10122216	2020-10-30	2020-11-20	2020-11-26	21	27	Animals
523	10.3390/ani10122312	2020-11-04	2020-12-01	2020-12-07	27	33	Animals
5241	10.3390/ani10122330	2020-11-06	2020-12-02	2020-12-07	26	31	Animals
525	10.3390/ani10122194	2020-11-03	2020-11-22	2020-11-24	19	21	Animals
5261	10.3390/ani10122270	2020-10-28	2020-11-28	2020-12-01	31	34	Animals
527	10.3390/ani10122201	2020-10-14	2020-11-18	2020-11-24	35	41	Animals
528	10.3390/ani10122334	2020-10-29	2020-12-04	2020-12-08	36	40	Animals
5291	10.3390/ani10122408	2020-11-11	2020-12-14	2020-12-16	33	35	Animals
5301	10.3390/ani10122373	2020-10-30	2020-12-07	2020-12-10	38	41	Animals
5311	10.3390/ani10122241	2020-10-11	2020-11-22	2020-11-29	42	49	Animals
532	10.3390/ani10122261	2020-10-26	2020-11-25	2020-12-01	30	36	Animals
533	10.3390/ani10122202	2020-10-29	2020-11-19	2020-11-24	21	26	Animals
534	10.3390/ani10122250	2020-11-13	2020-11-27	2020-11-30	14	17	Animals
5351	10.3390/ani10122207	2020-10-19	2020-11-18	2020-11-25	30	37	Animals
5361	10.3390/ani10122335	2020-10-05	2020-12-03	2020-12-08	59	64	Animals
5371	10.3390/ani10122208	2020-10-13	2020-11-20	2020-11-25	38	43	Animals
538	10.3390/ani10122368	2020-10-20	2020-12-08	2020-12-10	49	51	Animals
5391	10.3390/ani10122297	2020-10-17	2020-12-02	2020-12-04	46	48	Animals
5401	10.3390/ani10122220	2020-10-13	2020-11-21	2020-11-26	39	44	Animals
5411	10.3390/ani10122418	2020-11-11	2020-12-15	2020-12-17	34	36	Animals
542	10.3390/ani10122449	2020-11-10	2020-12-18	2020-12-21	38	41	Animals
543	10.3390/ani10122317	2020-09-05	2020-11-27	2020-12-07	83	93	Animals
544	10.3390/ani10122238	2020-10-22	2020-11-25	2020-11-29	34	38	Animals
5451	10.3390/ani10122331	2020-11-12	2020-12-04	2020-12-08	22	26	Animals
546	10.3390/ani10122294	2020-10-19	2020-12-02	2020-12-04	44	46	Animals
5471	10.3390/ani10122310	2020-10-06	2020-11-26	2020-12-06	51	61	Animals
548	10.3390/ani10122441	2020-11-03	2020-12-17	2020-12-20	44	47	Animals
549	10.3390/ani10122345	2020-10-19	2020-12-04	2020-12-09	46	51	Animals
5501	10.3390/ani10122274	2020-11-10	2020-11-26	2020-12-02	16	22	Animals
551	10.3390/ani10122413	2020-11-16	2020-12-10	2020-12-17	24	31	Animals
552	10.3390/ani10122369	2020-11-05	2020-12-01	2020-12-10	26	35	Animals
553	10.3390/ani10122439	2020-11-12	2020-12-17	2020-12-19	35	37	Animals
5541	10.3390/ani10122307	2020-10-27	2020-11-28	2020-12-05	32	39	Animals
5551	10.3390/ani10122453	2020-11-28	2020-12-18	2020-12-21	20	23	Animals
556	10.3390/ani10122258	2020-11-16	2020-11-27	2020-11-30	11	14	Animals
5571	10.3390/ani10122424	2020-11-02	2020-12-11	2020-12-17	39	45	Animals
558	10.3390/ani10122278	2020-10-23	2020-11-30	2020-12-03	38	41	Animals
559	10.3390/ani10122214	2020-10-28	2020-11-20	2020-11-26	23	29	Animals
560	10.3390/ani10122197	2020-10-30	2020-11-21	2020-11-24	22	25	Animals
561	10.3390/ani10122209	2020-10-31	2020-11-17	2020-11-25	17	25	Animals
562	10.3390/ani10122448	2020-11-09	2020-12-18	2020-12-21	39	42	Animals
563	10.3390/ani10122219	2020-11-11	2020-11-23	2020-11-26	12	15	Animals
564	10.3390/ani10122240	2020-09-11	2020-11-26	2020-11-29	76	79	Animals
565	10.3390/ani10122282	2020-11-23	2020-12-01	2020-12-03	8	10	Animals
5661	10.3390/ani10122211	2020-09-29	2020-11-19	2020-11-26	51	58	Animals
5671	10.3390/ani10122264	2020-10-27	2020-11-26	2020-12-01	30	35	Animals
5681	10.3390/ani10122260	2020-10-22	2020-11-27	2020-12-01	36	40	Animals
569	10.3390/ani10122308	2020-10-21	2020-12-03	2020-12-05	43	45	Animals
5701	10.3390/ani10122445	2020-11-24	2020-12-16	2020-12-20	22	26	Animals
571	10.3390/ani10122320	2020-10-30	2020-12-01	2020-12-07	32	38	Animals
5721	10.3390/ani10122338	2020-11-09	2020-12-07	2020-12-09	28	30	Animals
573	10.3390/ani10122313	2020-11-12	2020-12-03	2020-12-07	21	25	Animals
5741	10.3390/ani10122242	2020-09-29	2020-11-23	2020-11-29	55	61	Animals
575	10.3390/ani10122412	2020-11-23	2020-12-15	2020-12-17	22	24	Animals
5761	10.3390/ani10122224	2020-10-01	2020-11-25	2020-11-27	55	57	Animals
577	10.3390/ani10122444	2020-11-06	2020-12-16	2020-12-20	40	44	Animals
5781	10.3390/ani10122442	2020-11-17	2020-12-18	2020-12-20	31	33	Animals
579	10.3390/ani10122399	2020-10-05	2020-12-09	2020-12-15	65	71	Animals
580	10.3390/ani10122230	2020-11-11	2020-11-24	2020-11-27	13	16	Animals
5811	10.3390/ani10122428	2020-12-03	2020-12-15	2020-12-18	12	15	Animals
5821	10.3390/ani10122376	2020-11-02	2020-12-07	2020-12-11	35	39	Animals
5831	10.3390/ani10122356	2020-09-25	2020-12-05	2020-12-09	71	75	Animals
5841	10.3390/ani10122279	2020-11-07	2020-12-01	2020-12-03	24	26	Animals
5851	10.3390/ani10122372	2020-11-06	2020-12-09	2020-12-10	33	34	Animals
5861	10.3390/ani10122379	2020-11-25	2020-12-08	2020-12-11	13	16	Animals
5871	10.3390/ani10122273	2020-10-21	2020-11-19	2020-12-02	29	42	Animals
588	10.3390/ani10122410	2020-10-30	2020-12-12	2020-12-16	43	47	Animals
589	10.3390/ani10122435	2020-11-06	2020-12-16	2020-12-19	40	43	Animals
590	10.3390/ani10122215	2020-10-20	2020-11-24	2020-11-26	35	37	Animals
591	10.3390/ani10122290	2020-10-23	2020-11-24	2020-12-03	32	41	Animals
592	10.3390/ani10122437	2020-11-18	2020-12-17	2020-12-19	29	31	Animals
593	10.3390/ani10122231	2020-11-02	2020-11-25	2020-11-27	23	25	Animals
594	10.3390/ani10122430	2020-12-04	2020-12-14	2020-12-18	10	14	Animals
5951	10.3390/ani10122232	2020-10-26	2020-11-23	2020-11-27	28	32	Animals
5961	10.3390/ani10122433	2020-11-24	2020-12-14	2020-12-18	20	24	Animals
597	10.3390/ani10122429	2020-11-17	2020-12-15	2020-12-18	28	31	Animals
598	10.3390/ani10122328	2020-10-31	2020-12-04	2020-12-07	34	37	Animals
599	10.3390/ani10122314	2020-11-12	2020-12-02	2020-12-07	20	25	Animals
600	10.3390/ani10122302	2020-11-02	2020-12-03	2020-12-04	31	32	Animals
601	10.3390/ani10122390	2020-10-28	2020-12-07	2020-12-14	40	47	Animals
602	10.3390/ani10122298	2020-11-05	2020-12-02	2020-12-04	27	29	Animals
6031	10.3390/ani10122198	2020-09-21	2020-11-20	2020-11-24	60	64	Animals
604	10.3390/ani10122275	2020-10-26	2020-11-30	2020-12-02	35	37	Animals
605	10.3390/ani10122233	2020-11-09	2020-11-23	2020-11-27	14	18	Animals
6061	10.3390/ani10122402	2020-11-06	2020-12-10	2020-12-15	34	39	Animals
607	10.3390/ani10122217	2020-10-26	2020-11-18	2020-11-26	23	31	Animals
608	10.3390/ani10122363	2020-11-06	2020-12-08	2020-12-10	32	34	Animals
6091	10.3390/ani10122283	2020-10-17	2020-11-30	2020-12-03	44	47	Animals
6101	10.3390/ani10122434	2020-12-03	2020-12-16	2020-12-18	13	15	Animals
6111	10.3390/ani10122244	2020-11-07	2020-11-26	2020-11-30	19	23	Animals
6121	10.3390/ani10122213	2020-11-03	2020-11-24	2020-11-26	21	23	Animals
6131	10.3390/ani10122226	2020-10-01	2020-11-23	2020-11-27	53	57	Animals
614	10.3390/ani10122296	2020-11-04	2020-12-02	2020-12-04	28	30	Animals
6151	10.3390/ani10122332	2020-10-27	2020-12-01	2020-12-08	35	42	Animals
6161	10.3390/ani10122450	2020-10-29	2020-12-18	2020-12-21	50	53	Animals
617	10.3390/ani10122292	2020-11-08	2020-12-02	2020-12-03	24	25	Animals
6181	10.3390/ani10122267	2020-11-09	2020-11-29	2020-12-01	20	22	Animals
6191	10.3390/ani10122366	2020-10-12	2020-12-04	2020-12-10	53	59	Animals
620	10.3390/ani10122262	2020-11-02	2020-11-27	2020-12-01	25	29	Animals
6211	10.3390/ani10122446	2020-11-26	2020-12-17	2020-12-21	21	25	Animals
6221	10.3390/ani10122385	2020-11-06	2020-12-10	2020-12-12	34	36	Animals
6231	10.3390/ani10122323	2020-10-26	2020-12-04	2020-12-07	39	42	Animals
6241	10.3390/ani10122454	2020-10-19	2020-12-15	2020-12-21	57	63	Animals
6251	10.3390/ani10122325	2020-11-12	2020-12-02	2020-12-07	20	25	Animals
626	10.3390/ani10122359	2020-11-16	2020-12-04	2020-12-10	18	24	Animals
6271	10.3390/ani10122306	2020-11-11	2020-12-01	2020-12-05	20	24	Animals
628	10.3390/ani10122272	2020-10-15	2020-11-21	2020-12-02	37	48	Animals
629	10.3390/ani10122271	2020-10-09	2020-11-29	2020-12-02	51	54	Animals
6301	10.3390/ani10122420	2020-10-23	2020-12-16	2020-12-17	54	55	Animals
631	10.3390/ani10122253	2020-10-28	2020-11-26	2020-11-30	29	33	Animals
6321	10.3390/ani10122221	2020-10-17	2020-11-23	2020-11-26	37	40	Animals
633	10.3390/ani10122421	2020-09-28	2020-12-15	2020-12-17	78	80	Animals
634	10.3390/ani10122352	2020-07-21	2020-12-07	2020-12-09	139	141	Animals
6351	10.3390/ani10122416	2020-11-11	2020-12-15	2020-12-17	34	36	Animals
636	10.3390/ani10122438	2020-10-05	2020-12-16	2020-12-19	72	75	Animals
6371	10.3390/ani10122427	2020-11-06	2020-12-16	2020-12-18	40	42	Animals
6381	10.3390/ani10122400	2020-10-01	2020-12-13	2020-12-15	73	75	Animals
6391	10.3390/ani10122247	2020-11-06	2020-11-19	2020-11-30	13	24	Animals
6401	10.3390/ani10122327	2020-11-02	2020-12-02	2020-12-07	30	35	Animals
6411	10.3390/ani10122375	2020-11-11	2020-12-10	2020-12-11	29	30	Animals
6421	10.3390/ani10122255	2020-11-24	2020-11-27	2020-11-30	3	6	Animals
643	10.3390/ani10122350	2020-10-23	2020-12-06	2020-12-09	44	47	Animals
644	10.3390/ani10122447	2020-11-11	2020-12-17	2020-12-21	36	40	Animals
645	10.3390/ani10122406	2020-12-02	2020-12-13	2020-12-16	11	14	Animals
6461	10.3390/ani10122289	2020-11-04	2020-12-02	2020-12-04	28	30	Animals
6471	10.3390/ani10122382	2020-09-18	2020-12-07	2020-12-11	80	84	Animals
648	10.3390/ani10122346	2020-10-27	2020-12-07	2020-12-09	41	43	Animals
6491	10.3390/ani10122304	2020-10-15	2020-12-02	2020-12-04	48	50	Animals
650	10.3390/ani10122414	2020-11-01	2020-12-13	2020-12-17	42	46	Animals
651	10.3390/ani10122378	2020-11-20	2020-12-08	2020-12-11	18	21	Animals
6521	10.3390/ani10122358	2020-12-01	2020-12-05	2020-12-10	4	9	Animals
653	10.3390/ani10122243	2020-11-04	2020-11-27	2020-11-30	23	26	Animals
654	10.3390/ani10122324	2020-11-11	2020-12-04	2020-12-07	23	26	Animals
6551	10.3390/ani10122303	2020-08-10	2020-12-02	2020-12-04	114	116	Animals
6561	10.3390/ani10122300	2020-11-16	2020-11-30	2020-12-04	14	18	Animals
6571	10.3390/ani10122329	2020-10-30	2020-12-03	2020-12-07	34	38	Animals
658	10.3390/ani10122370	2020-11-09	2020-12-07	2020-12-10	28	31	Animals
659	10.3390/ani10122293	2020-11-03	2020-12-02	2020-12-04	29	31	Animals
6601	10.3390/ani10122223	2020-10-19	2020-11-23	2020-11-27	35	39	Animals
6611	10.3390/ani10122340	2020-11-11	2020-12-07	2020-12-09	26	28	Animals
662	10.3390/ani10122287	2020-11-18	2020-12-01	2020-12-03	13	15	Animals
663	10.3390/ani10122422	2020-10-10	2020-12-15	2020-12-17	66	68	Animals
6641	10.3390/ani10122246	2020-10-19	2020-11-27	2020-11-30	39	42	Animals
665	10.3390/ani10122256	2020-10-27	2020-11-23	2020-11-30	27	34	Animals
6661	10.3390/ani10122228	2020-10-19	2020-11-26	2020-11-27	38	39	Animals
667	10.3390/ani10122365	2020-11-10	2020-12-09	2020-12-10	29	30	Animals
6681	10.3390/ani10122225	2020-10-24	2020-11-25	2020-11-27	32	34	Animals
669	10.3390/ani10122336	2020-11-15	2020-12-03	2020-12-09	18	24	Animals
670	10.3390/ani10122301	2020-10-28	2020-12-02	2020-12-04	35	37	Animals
671	10.3390/ani10122295	2020-10-15	2020-12-01	2020-12-04	47	50	Animals
6721	10.3390/ani10122381	2020-11-09	2020-12-08	2020-12-11	29	32	Animals
6731	10.3390/ani10122229	2020-09-15	2020-11-25	2020-11-27	71	73	Animals
674	10.3390/ani10122411	2020-11-02	2020-12-14	2020-12-17	42	45	Animals
675	10.3390/ani10122440	2020-11-24	2020-12-17	2020-12-20	23	26	Animals
676	10.3390/ani10122362	2020-10-15	2020-12-08	2020-12-10	54	56	Animals
6771	10.3390/ani10122391	2020-11-11	2020-12-13	2020-12-15	32	34	Animals
6781	10.3390/ani10122339	2020-10-13	2020-11-10	2020-12-09	28	57	Animals
6791	10.3390/ani10122235	2020-10-26	2020-11-26	2020-11-28	31	33	Animals
6801	10.3390/ani10122265	2020-10-29	2020-11-30	2020-12-01	32	33	Animals
6811	10.3390/ani10122401	2020-11-18	2020-12-14	2020-12-15	26	27	Animals
6821	10.3390/ani10122268	2020-10-22	2020-11-29	2020-12-01	38	40	Animals
6831	10.3390/ani10122252	2020-11-18	2020-11-29	2020-11-30	11	12	Animals
6841	10.3390/ani10122210	2020-10-19	2020-11-23	2020-11-25	35	37	Animals
6851	10.3390/ani10122353	2020-11-02	2020-12-08	2020-12-09	36	37	Animals
686	10.3390/ani10122397	2020-11-26	2020-12-12	2020-12-15	16	19	Animals
6871	10.3390/ani10122405	2020-11-26	2020-12-14	2020-12-16	18	20	Animals
6881	10.3390/ani10122249	2020-11-03	2020-11-28	2020-11-30	25	27	Animals
6891	10.3390/ani10122351	2020-11-18	2020-12-08	2020-12-09	20	21	Animals
6901	10.3390/ani10122254	2020-11-10	2020-11-27	2020-11-30	17	20	Animals
691	10.3390/ani10122417	2020-11-26	2020-12-16	2020-12-17	20	21	Animals
6921	10.3390/ani10122263	2020-11-10	2020-11-29	2020-12-01	19	21	Animals
6931	10.3390/ani10122357	2020-10-30	2020-12-08	2020-12-10	39	41	Animals
6941	10.3390/ani10122277	2020-09-01	2020-10-02	2020-12-03	31	93	Animals
695	10.3390/ani10122259	2020-11-02	2020-11-27	2020-11-30	25	28	Animals
6961	10.3390/ani10112016	2020-09-30	2020-10-30	2020-11-02	30	33	Animals
6971	10.3390/ani10112067	2020-10-02	2020-11-02	2020-11-08	31	37	Animals
698	10.3390/ani10112041	2020-08-19	2020-10-30	2020-11-05	72	78	Animals
699	10.3390/ani10112136	2020-10-23	2020-11-12	2020-11-17	20	25	Animals
700	10.3390/ani10112155	2020-09-30	2020-11-16	2020-11-19	47	50	Animals
7011	10.3390/ani10112020	2020-09-16	2020-10-28	2020-11-03	42	48	Animals
7021	10.3390/ani10112109	2020-10-14	2020-11-10	2020-11-13	27	30	Animals
7031	10.3390/ani10112060	2020-08-30	2020-10-25	2020-11-07	56	69	Animals
7041	10.3390/ani10111952	2020-09-04	2020-10-20	2020-10-23	46	49	Animals
705	10.3390/ani10112108	2020-09-21	2020-11-09	2020-11-13	49	53	Animals
7061	10.3390/ani10112122	2020-10-10	2020-11-12	2020-11-16	33	37	Animals
707	10.3390/ani10111945	2020-09-08	2020-10-19	2020-10-22	41	44	Animals
7081	10.3390/ani10112019	2020-10-09	2020-10-31	2020-11-03	22	25	Animals
709	10.3390/ani10112181	2020-09-28	2020-11-03	2020-11-22	36	55	Animals
7101	10.3390/ani10111999	2020-10-02	2020-10-27	2020-10-30	25	28	Animals
711	10.3390/ani10111968	2020-09-10	2020-10-22	2020-10-26	42	46	Animals
7121	10.3390/ani10112078	2020-09-24	2020-11-03	2020-11-09	40	46	Animals
7131	10.3390/ani10112124	2020-09-24	2020-10-20	2020-11-16	26	53	Animals
7141	10.3390/ani10111989	2020-09-12	2020-10-27	2020-10-29	45	47	Animals
7151	10.3390/ani10112115	2020-09-25	2020-11-12	2020-11-15	48	51	Animals
7161	10.3390/ani10112156	2020-10-01	2020-11-17	2020-11-19	47	49	Animals
717	10.3390/ani10111958	2020-09-15	2020-10-20	2020-10-23	35	38	Animals
7181	10.3390/ani10112065	2020-07-29	2020-11-03	2020-11-07	97	101	Animals
719	10.3390/ani10112035	2020-09-28	2020-11-02	2020-11-04	35	37	Animals
720	10.3390/ani10111982	2020-10-05	2020-10-26	2020-10-28	21	23	Animals
7211	10.3390/ani10112159	2020-10-12	2020-11-17	2020-11-19	36	38	Animals
7221	10.3390/ani10112029	2020-09-03	2020-11-02	2020-11-04	60	62	Animals
723	10.3390/ani10112127	2020-10-15	2020-11-12	2020-11-16	28	32	Animals
7241	10.3390/ani10111956	2020-09-15	2020-10-19	2020-10-23	34	38	Animals
7251	10.3390/ani10111943	2020-09-15	2020-10-20	2020-10-22	35	37	Animals
7261	10.3390/ani10112146	2020-10-23	2020-11-16	2020-11-18	24	26	Animals
727	10.3390/ani10112074	2020-10-21	2020-11-03	2020-11-09	13	19	Animals
7281	10.3390/ani10111983	2020-09-10	2020-10-24	2020-10-28	44	48	Animals
7291	10.3390/ani10112083	2020-09-21	2020-11-05	2020-11-10	45	50	Animals
7301	10.3390/ani10112002	2020-10-13	2020-10-28	2020-10-30	15	17	Animals
7311	10.3390/ani10112118	2020-10-16	2020-11-11	2020-11-15	26	30	Animals
732	10.3390/ani10112164	2020-11-02	2020-11-17	2020-11-20	15	18	Animals
733	10.3390/ani10112192	2020-10-28	2020-11-20	2020-11-23	23	26	Animals
734	10.3390/ani10112154	2020-11-03	2020-11-17	2020-11-19	14	16	Animals
735	10.3390/ani10112079	2020-10-20	2020-11-05	2020-11-09	16	20	Animals
736	10.3390/ani10112063	2020-09-29	2020-11-03	2020-11-07	35	39	Animals
7371	10.3390/ani10112090	2020-10-08	2020-11-09	2020-11-11	32	34	Animals
7381	10.3390/ani10112130	2020-10-27	2020-11-14	2020-11-16	18	20	Animals
7391	10.3390/ani10112121	2020-11-02	2020-11-14	2020-11-16	12	14	Animals
740	10.3390/ani10112168	2020-10-26	2020-11-17	2020-11-20	22	25	Animals
741	10.3390/ani10112183	2020-09-27	2020-11-19	2020-11-22	53	56	Animals
7421	10.3390/ani10112157	2020-10-18	2020-11-17	2020-11-19	30	32	Animals
7431	10.3390/ani10112126	2020-09-25	2020-11-13	2020-11-16	49	52	Animals
7441	10.3390/ani10112047	2020-08-28	2020-10-28	2020-11-05	61	69	Animals
745	10.3390/ani10112001	2020-08-08	2020-10-28	2020-10-30	81	83	Animals
7461	10.3390/ani10111981	2020-08-19	2020-10-20	2020-10-28	62	70	Animals
747	10.3390/ani10112075	2020-10-14	2020-11-06	2020-11-09	23	26	Animals
7481	10.3390/ani10112010	2020-10-07	2020-10-29	2020-10-31	22	24	Animals
7491	10.3390/ani10112113	2020-10-16	2020-11-12	2020-11-14	27	29	Animals
750	10.3390/ani10112049	2020-09-09	2020-10-29	2020-11-05	50	57	Animals
7511	10.3390/ani10111955	2020-09-22	2020-10-19	2020-10-23	27	31	Animals
7521	10.3390/ani10111957	2020-09-21	2020-10-21	2020-10-23	30	32	Animals
7531	10.3390/ani10112032	2020-10-08	2020-11-02	2020-11-04	25	27	Animals
7541	10.3390/ani10112128	2020-09-26	2020-11-13	2020-11-16	48	51	Animals
7551	10.3390/ani10112024	2020-09-30	2020-10-27	2020-11-03	27	34	Animals
756	10.3390/ani10112028	2020-09-10	2020-11-02	2020-11-04	53	55	Animals
7571	10.3390/ani10112176	2020-10-01	2020-11-19	2020-11-21	49	51	Animals
7581	10.3390/ani10112138	2020-10-19	2020-11-14	2020-11-17	26	29	Animals
759	10.3390/ani10112142	2020-10-18	2020-11-16	2020-11-18	29	31	Animals
760	10.3390/ani10111965	2020-08-28	2020-10-23	2020-10-25	56	58	Animals
7611	10.3390/ani10111977	2020-10-10	2020-10-26	2020-10-28	16	18	Animals
7621	10.3390/ani10112097	2020-10-16	2020-11-09	2020-11-11	24	26	Animals
763	10.3390/ani10112099	2020-10-09	2020-11-10	2020-11-12	32	34	Animals
7641	10.3390/ani10111985	2020-10-09	2020-10-22	2020-10-29	13	20	Animals
7651	10.3390/ani10112187	2020-08-25	2020-09-26	2020-11-23	32	90	Animals
7661	10.3390/ani10112175	2020-10-14	2020-11-19	2020-11-21	36	38	Animals
767	10.3390/ani10112054	2020-10-02	2020-11-03	2020-11-06	32	35	Animals
7681	10.3390/ani10112104	2020-10-02	2020-11-05	2020-11-13	34	42	Animals
769	10.3390/ani10112072	2020-10-19	2020-11-07	2020-11-09	19	21	Animals
770	10.3390/ani10112030	2020-10-06	2020-11-02	2020-11-04	27	29	Animals
7711	10.3390/ani10112139	2020-09-24	2020-11-04	2020-11-17	41	54	Animals
772	10.3390/ani10112044	2020-10-06	2020-11-04	2020-11-05	29	30	Animals
7731	10.3390/ani10112084	2020-10-17	2020-11-06	2020-11-10	20	24	Animals
7741	10.3390/ani10112111	2020-09-26	2020-11-10	2020-11-13	45	48	Animals
775	10.3390/ani10111951	2020-09-02	2020-10-21	2020-10-23	49	51	Animals
7761	10.3390/ani10112190	2020-11-09	2020-11-20	2020-11-23	11	14	Animals
777	10.3390/ani10112145	2020-10-27	2020-11-15	2020-11-18	19	22	Animals
7781	10.3390/ani10112062	2020-10-25	2020-11-05	2020-11-07	11	13	Animals
779	10.3390/ani10112123	2020-09-25	2020-11-12	2020-11-16	48	52	Animals
7801	10.3390/ani10112137	2020-09-08	2020-11-13	2020-11-17	66	70	Animals
7811	10.3390/ani10112085	2020-10-02	2020-11-05	2020-11-10	34	39	Animals
782	10.3390/ani10112189	2020-10-28	2020-11-20	2020-11-23	23	26	Animals
783	10.3390/ani10112167	2020-09-02	2020-11-18	2020-11-20	77	79	Animals
784	10.3390/ani10112150	2020-08-30	2020-11-10	2020-11-19	72	81	Animals
785	10.3390/ani10111941	2020-09-08	2020-10-19	2020-10-22	41	44	Animals
786	10.3390/ani10112170	2020-10-16	2020-11-18	2020-11-21	33	36	Animals
7871	10.3390/ani10111938	2020-08-24	2020-10-19	2020-10-22	56	59	Animals
788	10.3390/ani10111959	2020-10-12	2020-10-22	2020-10-24	10	12	Animals
789	10.3390/ani10111990	2020-09-28	2020-10-18	2020-10-29	20	31	Animals
790	10.3390/ani10112046	2020-09-29	2020-11-02	2020-11-05	34	37	Animals
7911	10.3390/ani10112011	2020-10-06	2020-10-30	2020-10-31	24	25	Animals
7921	10.3390/ani10112003	2020-09-19	2020-10-28	2020-10-30	39	41	Animals
7931	10.3390/ani10111973	2020-08-31	2020-09-23	2020-10-28	23	58	Animals
7941	10.3390/ani10112013	2020-10-09	2020-10-29	2020-11-01	20	23	Animals
795	10.3390/ani10111967	2020-09-23	2020-10-25	2020-10-26	32	33	Animals
7961	10.3390/ani10111986	2020-09-16	2020-10-26	2020-10-29	40	43	Animals
7971	10.3390/ani10112045	2020-10-06	2020-11-03	2020-11-05	28	30	Animals
7981	10.3390/ani10112166	2020-09-27	2020-11-02	2020-11-20	36	54	Animals
799	10.3390/ani10112066	2020-09-18	2020-11-05	2020-11-07	48	50	Animals
8001	10.3390/ani10112026	2020-09-30	2020-10-30	2020-11-03	30	34	Animals
801	10.3390/ani10111960	2020-10-02	2020-10-21	2020-10-24	19	22	Animals
802	10.3390/ani10112193	2020-10-25	2020-11-18	2020-11-23	24	29	Animals
8031	10.3390/ani10112073	2020-10-10	2020-11-05	2020-11-09	26	30	Animals
804	10.3390/ani10112012	2020-09-18	2020-10-30	2020-11-01	42	44	Animals
805	10.3390/ani10112144	2020-10-08	2020-11-16	2020-11-18	39	41	Animals
8061	10.3390/ani10112098	2020-10-19	2020-11-09	2020-11-11	21	23	Animals
8071	10.3390/ani10112135	2020-10-24	2020-11-16	2020-11-17	23	24	Animals
808	10.3390/ani10112059	2020-08-15	2020-10-30	2020-11-07	76	84	Animals
8091	10.3390/ani10111946	2020-07-21	2020-10-19	2020-10-22	90	93	Animals
8101	10.3390/ani10112114	2020-10-19	2020-11-12	2020-11-14	24	26	Animals
811	10.3390/ani10111969	2020-10-09	2020-10-23	2020-10-26	14	17	Animals
812	10.3390/ani10112102	2020-10-16	2020-11-09	2020-11-12	24	27	Animals
813	10.3390/ani10112120	2020-10-06	2020-11-13	2020-11-16	38	41	Animals
8141	10.3390/ani10112043	2020-09-29	2020-11-03	2020-11-05	35	37	Animals
815	10.3390/ani10111942	2020-08-18	2020-10-21	2020-10-22	64	65	Animals
8161	10.3390/ani10112009	2020-09-24	2020-10-29	2020-10-31	35	37	Animals
817	10.3390/ani10112069	2020-10-15	2020-11-03	2020-11-09	19	25	Animals
8181	10.3390/ani10111944	2020-09-03	2020-10-20	2020-10-22	47	49	Animals
8191	10.3390/ani10111947	2020-09-18	2020-10-16	2020-10-22	28	34	Animals
8201	10.3390/ani10112080	2020-10-29	2020-11-07	2020-11-10	9	12	Animals
8211	10.3390/ani10112048	2020-09-23	2020-11-03	2020-11-05	41	43	Animals
822	10.3390/ani10112186	2020-10-09	2020-11-06	2020-11-22	28	44	Animals
823	10.3390/ani10112162	2020-10-20	2020-11-15	2020-11-20	26	31	Animals
8241	10.3390/ani10111979	2020-09-27	2020-10-27	2020-10-28	30	31	Animals
8251	10.3390/ani10112172	2020-10-18	2020-11-19	2020-11-21	32	34	Animals
8261	10.3390/ani10112087	2020-09-30	2020-11-09	2020-11-11	40	42	Animals
827	10.3390/ani10112133	2020-09-23	2020-11-03	2020-11-17	41	55	Animals
8281	10.3390/ani10112077	2020-09-22	2020-11-06	2020-11-09	45	48	Animals
8291	10.3390/ani10112105	2020-08-11	2020-11-11	2020-11-13	92	94	Animals
8301	10.3390/ani10112036	2020-10-08	2020-11-02	2020-11-04	25	27	Animals
831	10.3390/ani10112182	2020-09-25	2020-11-18	2020-11-22	54	58	Animals
8321	10.3390/ani10111992	2020-09-15	2020-10-27	2020-10-29	42	44	Animals
8331	10.3390/ani10112000	2020-10-12	2020-10-28	2020-10-30	16	18	Animals
8341	10.3390/ani10112004	2020-09-24	2020-10-27	2020-10-30	33	36	Animals
8351	10.3390/ani10112015	2020-10-20	2020-10-29	2020-11-02	9	13	Animals
8361	10.3390/ani10112110	2020-09-25	2020-11-10	2020-11-13	46	49	Animals
8371	10.3390/ani10111970	2020-09-25	2020-10-22	2020-10-27	27	32	Animals
8381	10.3390/ani10112173	2020-10-30	2020-11-19	2020-11-21	20	22	Animals
839	10.3390/ani10111988	2020-09-10	2020-10-27	2020-10-29	47	49	Animals
8401	10.3390/ani10111997	2020-10-05	2020-10-28	2020-10-30	23	25	Animals
8411	10.3390/ani10111949	2020-09-20	2020-10-20	2020-10-23	30	33	Animals
842	10.3390/ani10112040	2020-10-07	2020-11-02	2020-11-04	26	28	Animals
8431	10.3390/ani10112180	2020-09-11	2020-11-20	2020-11-22	70	72	Animals
8441	10.3390/ani10112081	2020-10-20	2020-11-09	2020-11-10	20	21	Animals
845	10.3390/ani10112117	2020-10-05	2020-11-09	2020-11-15	35	41	Animals
8461	10.3390/ani10112178	2020-10-27	2020-11-20	2020-11-22	24	26	Animals
8471	10.3390/ani10112119	2020-10-12	2020-11-11	2020-11-15	30	34	Animals
848	10.3390/ani10112095	2020-10-26	2020-10-30	2020-11-11	4	16	Animals
8491	10.3390/ani10111954	2020-09-15	2020-10-20	2020-10-23	35	38	Animals
850	10.3390/ani10111978	2020-08-18	2020-10-16	2020-10-28	59	71	Animals
8511	10.3390/ani10112158	2020-10-02	2020-11-16	2020-11-19	45	48	Animals
8521	10.3390/ani10112023	2020-10-04	2020-10-31	2020-11-03	27	30	Animals
853	10.3390/ani10112177	2020-10-14	2020-11-19	2020-11-21	36	38	Animals
854	10.3390/ani10112033	2020-09-23	2020-11-02	2020-11-04	40	42	Animals
8551	10.3390/ani10112005	2020-10-07	2020-10-27	2020-10-30	20	23	Animals
8561	10.3390/ani10112071	2020-10-10	2020-11-06	2020-11-09	27	30	Animals
8571	10.3390/ani10112053	2020-09-30	2020-11-05	2020-11-06	36	37	Animals
858	10.3390/ani10111996	2020-09-29	2020-10-25	2020-10-30	26	31	Animals
8591	10.3390/ani10111974	2020-09-22	2020-10-26	2020-10-28	34	36	Animals
860	10.3390/ani10112089	2020-09-30	2020-11-07	2020-11-11	38	42	Animals
8611	10.3390/ani10112116	2020-09-28	2020-11-05	2020-11-15	38	48	Animals
8621	10.3390/ani10112018	2020-09-11	2020-10-30	2020-11-02	49	52	Animals
8631	10.3390/ani10112027	2020-10-08	2020-10-28	2020-11-04	20	27	Animals
864	10.3390/ani10111987	2020-09-14	2020-10-27	2020-10-29	43	45	Animals
865	10.3390/ani10112151	2020-10-23	2020-11-17	2020-11-19	25	27	Animals
866	10.3390/ani10111948	2020-08-21	2020-10-02	2020-10-23	42	63	Animals
867	10.3390/ani10112100	2020-10-14	2020-11-09	2020-11-12	26	29	Animals
868	10.3390/ani10112038	2020-10-01	2020-10-30	2020-11-04	29	34	Animals
869	10.3390/ani10111980	2020-08-13	2020-10-22	2020-10-28	70	76	Animals
870	10.3390/ani10112086	2020-09-25	2020-11-05	2020-11-10	41	46	Animals
871	10.3390/ani10112160	2020-11-11	2020-11-18	2020-11-20	7	9	Animals
872	10.3390/ani10112149	2020-10-20	2020-11-10	2020-11-19	21	30	Animals
873	10.3390/ani10112101	2020-10-23	2020-11-10	2020-11-12	18	20	Animals
874	10.3390/ani10112064	2020-10-13	2020-11-05	2020-11-07	23	25	Animals
875	10.3390/ani10112125	2020-10-23	2020-11-11	2020-11-16	19	24	Animals
876	10.3390/ani10112055	2020-09-17	2020-11-03	2020-11-06	47	50	Animals
877	10.3390/ani10112112	2020-09-18	2020-11-12	2020-11-13	55	56	Animals
878	10.3390/ani10112191	2020-10-17	2020-11-19	2020-11-23	33	37	Animals
879	10.3390/ani10112163	2020-11-03	2020-11-18	2020-11-20	15	17	Animals
880	10.3390/ani10112092	2020-09-28	2020-11-09	2020-11-11	42	44	Animals
881	10.3390/ani10111998	2020-09-24	2020-10-29	2020-10-30	35	36	Animals
882	10.3390/ani10111972	2020-08-31	2020-10-22	2020-10-27	52	57	Animals
883	10.3390/ani10111994	2020-10-12	2020-10-27	2020-10-29	15	17	Animals
884	10.3390/ani10112184	2020-09-22	2020-11-19	2020-11-22	58	61	Animals
885	10.3390/ani10111976	2020-09-29	2020-10-24	2020-10-28	25	29	Animals
886	10.3390/ani10112153	2020-10-12	2020-11-16	2020-11-19	35	38	Animals
887	10.3390/ani10112103	2020-10-20	2020-11-11	2020-11-12	22	23	Animals
888	10.3390/ani10111993	2020-09-30	2020-10-26	2020-10-29	26	29	Animals
889	10.3390/ani10112022	2020-09-24	2020-10-30	2020-11-03	36	40	Animals
890	10.3390/ani10112174	2020-10-22	2020-11-17	2020-11-21	26	30	Animals
891	10.3390/ani10111975	2020-09-07	2020-10-25	2020-10-28	48	51	Animals
892	10.3390/ani10111966	2020-08-19	2020-10-20	2020-10-26	62	68	Animals
893	10.3390/ani10112147	2020-10-30	2020-11-13	2020-11-18	14	19	Animals
894	10.3390/ani10111940	2020-08-04	2020-10-20	2020-10-22	77	79	Animals
895	10.3390/ani10111939	2020-09-08	2020-10-13	2020-10-22	35	44	Animals
896	10.3390/ani10112088	2020-10-20	2020-11-06	2020-11-10	17	21	Animals
897	10.3390/ani10112093	2020-09-24	2020-11-06	2020-11-11	43	48	Animals
898	10.3390/ani10111962	2020-10-01	2020-10-22	2020-10-24	21	23	Animals
899	10.3390/ani10111953	2020-09-08	2020-10-20	2020-10-23	42	45	Animals
900	10.3390/ani10112169	2020-09-30	2020-11-17	2020-11-20	48	51	Animals
901	10.3390/ani10112132	2020-09-30	2020-11-09	2020-11-17	40	48	Animals
902	10.3390/ani10112057	2020-10-01	2020-11-03	2020-11-06	33	36	Animals
903	10.3390/ani10101912	2020-09-28	2020-10-16	2020-10-19	18	21	Animals
904	10.3390/ani10101884	2020-09-08	2020-10-09	2020-10-15	31	37	Animals
905	10.3390/ani10101758	2020-08-14	2020-09-16	2020-09-28	33	45	Animals
906	10.3390/ani10101852	2020-08-27	2020-09-25	2020-10-12	29	46	Animals
907	10.3390/ani10101856	2020-08-25	2020-10-08	2020-10-12	44	48	Animals
908	10.3390/ani10101818	2020-09-13	2020-10-03	2020-10-06	20	23	Animals
909	10.3390/ani10101843	2020-09-10	2020-09-29	2020-10-10	19	30	Animals
910	10.3390/ani10101874	2020-09-15	2020-10-10	2020-10-14	25	29	Animals
911	10.3390/ani10101911	2020-08-11	2020-10-13	2020-10-18	63	68	Animals
912	10.3390/ani10101822	2020-09-03	2020-10-05	2020-10-06	32	33	Animals
913	10.3390/ani10101883	2020-09-25	2020-10-12	2020-10-15	17	20	Animals
914	10.3390/ani10101857	2020-09-08	2020-10-06	2020-10-12	28	34	Animals
915	10.3390/ani10101866	2020-09-22	2020-10-09	2020-10-13	17	21	Animals
916	10.3390/ani12111428	2022-04-28	2022-05-30	2022-05-31	32	33	Animals
917	10.3390/ani12111385	2022-05-04	2022-05-25	2022-05-27	21	23	Animals
918	10.3390/ani12111461	2022-04-13	2022-06-02	2022-06-04	50	52	Animals
919	10.3390/ani12121513	2022-04-20	2022-05-30	2022-06-10	40	51	Animals
920	10.3390/ani12111351	2022-04-27	2022-05-21	2022-05-25	24	28	Animals
921	10.3390/ani12121568	2022-03-22	2022-06-16	2022-06-17	86	87	Animals
922	10.3390/ani12091196	2022-03-29	2022-05-03	2022-05-06	35	38	Animals
923	10.3390/ani12101279	2022-04-07	2022-05-16	2022-05-17	39	40	Animals
924	10.3390/ani12101285	2022-03-25	2022-05-16	2022-05-17	52	53	Animals
925	10.3390/ani12091055	2022-04-01	2022-04-16	2022-04-19	15	18	Animals
926	10.3390/ani12091148	2022-03-08	2022-04-26	2022-04-29	49	52	Animals
927	10.3390/ani12101240	2022-04-11	2022-05-09	2022-05-11	28	30	Animals
928	10.3390/ani12070880	2022-02-16	2022-03-30	2022-03-30	42	42	Animals
929	10.3390/ani12070840	2021-12-17	2022-03-23	2022-03-26	96	99	Animals
930	10.3390/ani12070832	2022-02-14	2022-03-23	2022-03-25	37	39	Animals
931	10.3390/ani12070939	2022-02-10	2022-04-05	2022-04-06	54	55	Animals
932	10.3390/ani12070907	2022-03-09	2022-03-31	2022-04-01	22	23	Animals
933	10.3390/ani12080982	2022-02-21	2022-04-06	2022-04-11	44	49	Animals
934	10.3390/ani12080995	2022-02-21	2022-03-29	2022-04-12	36	50	Animals
935	10.3390/ani12050588	2022-01-13	2022-02-23	2022-02-25	41	43	Animals
936	10.3390/ani12050568	2022-01-14	2022-02-12	2022-02-24	29	41	Animals
937	10.3390/ani12050562	2021-11-03	2022-01-20	2022-02-23	78	112	Animals
938	10.3390/ani12050610	2021-12-20	2022-02-25	2022-02-28	67	70	Animals
939	10.3390/ani12030346	2021-12-18	2022-01-25	2022-01-31	38	44	Animals
940	10.3390/ani12030375	2021-12-10	2022-01-27	2022-02-03	48	55	Animals
941	10.3390/ani12040530	2022-01-21	2022-02-18	2022-02-21	28	31	Animals
942	10.3390/ani12030311	2021-12-11	2022-01-25	2022-01-27	45	47	Animals
943	10.3390/ani12040525	2021-12-14	2022-02-19	2022-02-21	67	69	Animals
944	10.3390/ani12040512	2022-01-18	2022-02-17	2022-02-18	30	31	Animals
945	10.3390/ani12040449	2021-12-31	2022-02-10	2022-02-12	41	43	Animals
946	10.3390/ani12040515	2022-01-18	2022-02-16	2022-02-19	29	32	Animals
947	10.3390/ani12030392	2022-01-05	2022-02-03	2022-02-07	29	33	Animals
948	10.3390/ani12040500	2022-01-01	2022-02-15	2022-02-17	45	47	Animals
949	10.3390/ani12030272	2021-10-31	2021-12-22	2022-01-22	52	83	Animals
950	10.3390/ani12020151	2021-11-11	2022-01-04	2022-01-08	54	58	Animals
951	10.3390/ani12020202	2021-12-13	2022-01-13	2022-01-15	31	33	Animals
952	10.3390/ani12010092	2021-12-05	2021-12-29	2021-12-31	24	26	Animals
953	10.3390/ani12010086	2021-11-09	2021-12-21	2021-12-31	42	52	Animals
954	10.3390/ani12010096	2021-12-01	2021-12-23	2022-01-01	22	31	Animals
955	10.3390/ani12010104	2021-11-30	2021-12-30	2022-01-02	30	33	Animals
956	10.3390/ani12020137	2021-11-24	2022-01-04	2022-01-07	41	44	Animals
957	10.3390/ani12010038	2021-10-05	2021-12-23	2021-12-25	79	81	Animals
958	10.3390/ani11123451	2021-09-18	2021-11-30	2021-12-03	73	76	Animals
959	10.3390/ani11123525	2021-10-04	2021-12-07	2021-12-10	64	67	Animals
960	10.3390/ani11123342	2021-10-08	2021-11-21	2021-11-23	44	46	Animals
961	10.3390/ani11123413	2021-10-19	2021-11-26	2021-11-30	38	42	Animals
962	10.3390/ani11123499	2021-10-12	2021-12-06	2021-12-08	55	57	Animals
963	10.3390/ani11123565	2021-10-26	2021-12-11	2021-12-15	46	50	Animals
964	10.3390/ani11113106	2021-08-30	2021-10-29	2021-10-30	60	61	Animals
965	10.3390/ani11113216	2021-07-14	2021-11-08	2021-11-10	117	119	Animals
966	10.3390/ani11113298	2021-10-06	2021-11-16	2021-11-18	41	43	Animals
967	10.3390/ani11113235	2021-10-08	2021-11-08	2021-11-12	31	35	Animals
968	10.3390/ani11113130	2021-09-20	2021-10-28	2021-11-01	38	42	Animals
969	10.3390/ani11102895	2021-04-19	2021-07-07	2021-10-05	79	169	Animals
970	10.3390/ani11102936	2021-06-28	2021-10-06	2021-10-11	100	105	Animals
971	10.3390/ani11102998	2021-08-31	2021-10-14	2021-10-19	44	49	Animals
972	10.3390/ani11102798	2021-07-26	2021-09-22	2021-09-25	58	61	Animals
973	10.3390/ani11102989	2021-09-05	2021-10-09	2021-10-17	34	42	Animals
974	10.3390/ani11102930	2021-07-16	2021-10-08	2021-10-10	84	86	Animals
975	10.3390/ani11092536	2021-07-10	2021-08-24	2021-08-29	45	50	Animals
976	10.3390/ani11092682	2021-08-16	2021-09-08	2021-09-13	23	28	Animals
977	10.3390/ani11092671	2021-07-30	2021-09-08	2021-09-11	40	43	Animals
978	10.3390/ani11092686	2021-08-11	2021-09-08	2021-09-13	28	33	Animals
979	10.3390/ani11092592	2021-07-16	2021-09-01	2021-09-03	47	49	Animals
980	10.3390/ani11092615	2021-07-23	2021-09-02	2021-09-06	41	45	Animals
981	10.3390/ani11092643	2021-08-04	2021-09-08	2021-09-09	35	36	Animals
982	10.3390/ani11082283	2021-05-31	2021-07-27	2021-08-02	57	63	Animals
983	10.3390/ani11082191	2021-06-28	2021-07-21	2021-07-23	23	25	Animals
984	10.3390/ani11082252	2021-07-02	2021-07-26	2021-07-30	24	28	Animals
985	10.3390/ani11082309	2021-07-02	2021-08-03	2021-08-05	32	34	Animals
986	10.3390/ani11082226	2021-06-09	2021-07-24	2021-07-28	45	49	Animals
987	10.3390/ani11082199	2021-05-27	2021-07-22	2021-07-26	56	60	Animals
988	10.3390/ani11082370	2021-06-28	2021-08-09	2021-08-11	42	44	Animals
989	10.3390/ani11082270	2021-06-24	2021-07-30	2021-07-31	36	37	Animals
990	10.3390/ani11071954	2021-05-06	2021-06-27	2021-06-30	52	55	Animals
991	10.3390/ani11071871	2021-05-11	2021-06-19	2021-06-23	39	43	Animals
992	10.3390/ani11072019	2021-05-13	2021-07-01	2021-07-06	49	54	Animals
993	10.3390/ani11071910	2021-05-19	2021-06-23	2021-06-27	35	39	Animals
994	10.3390/ani11071863	2021-04-29	2021-06-18	2021-06-23	50	55	Animals
995	10.3390/ani11071994	2021-06-02	2021-06-30	2021-07-03	28	31	Animals
996	10.3390/ani11071993	2021-06-08	2021-07-01	2021-07-02	23	24	Animals
997	10.3390/ani11071990	2021-06-02	2021-06-29	2021-07-02	27	30	Animals
998	10.3390/ani11071949	2021-05-07	2021-06-22	2021-06-30	46	54	Animals
999	10.3390/ani11071900	2021-05-17	2021-06-22	2021-06-25	36	39	Animals
1000	10.3390/ani11072058	2021-05-20	2021-07-06	2021-07-09	47	50	Animals
1001	10.3390/ani11071970	2021-05-14	2021-06-29	2021-06-30	46	47	Animals
1002	10.3390/ani11061785	2021-05-06	2021-06-06	2021-06-15	31	40	Animals
1003	10.3390/ani11061659	2021-05-11	2021-05-31	2021-06-02	20	22	Animals
1004	10.3390/ani11061561	2021-04-05	2021-05-24	2021-05-27	49	52	Animals
1005	10.3390/ani11061600	2021-04-20	2021-05-26	2021-05-28	36	38	Animals
1006	10.3390/ani11061803	2021-05-24	2021-06-14	2021-06-17	21	24	Animals
1007	10.3390/ani11061575	2021-03-26	2021-05-20	2021-05-27	55	62	Animals
1008	10.3390/ani11051194	2021-03-26	2021-04-19	2021-04-21	24	26	Animals
1009	10.3390/ani11051335	2021-03-26	2021-04-24	2021-05-08	29	43	Animals
1010	10.3390/ani11051383	2021-03-28	2021-05-11	2021-05-13	44	46	Animals
1011	10.3390/ani11051408	2021-03-22	2021-05-13	2021-05-14	52	53	Animals
1012	10.3390/ani11051373	2021-04-01	2021-05-08	2021-05-12	37	41	Animals
1013	10.3390/ani11051374	2021-03-04	2021-04-30	2021-05-12	57	69	Animals
1014	10.3390/ani11051345	2021-03-23	2021-05-06	2021-05-09	44	47	Animals
1015	10.3390/ani11051446	2021-03-25	2021-05-15	2021-05-18	51	54	Animals
1016	10.3390/ani11051432	2021-03-18	2021-05-14	2021-05-17	57	60	Animals
1017	10.3390/ani11051208	2021-03-11	2021-04-19	2021-04-22	39	42	Animals
1018	10.3390/ani11051356	2021-03-19	2021-05-05	2021-05-11	47	53	Animals
1019	10.3390/ani11051306	2021-03-18	2021-04-29	2021-04-30	42	43	Animals
1020	10.3390/ani11041066	2021-01-05	2021-03-25	2021-04-09	79	94	Animals
1021	10.3390/ani11041161	2021-03-25	2021-04-15	2021-04-18	21	24	Animals
1022	10.3390/ani11041179	2021-03-11	2021-04-12	2021-04-20	32	40	Animals
1023	10.3390/ani11040953	2021-03-08	2021-03-24	2021-03-29	16	21	Animals
1024	10.3390/ani11040999	2021-03-16	2021-03-30	2021-04-02	14	17	Animals
1025	10.3390/ani11030674	2021-02-10	2021-02-25	2021-03-03	15	21	Animals
1026	10.3390/ani11030645	2021-02-08	2021-02-24	2021-03-01	16	21	Animals
1027	10.3390/ani11030667	2021-02-09	2021-02-25	2021-03-02	16	21	Animals
1028	10.3390/ani11030675	2021-02-03	2021-02-27	2021-03-03	24	28	Animals
1029	10.3390/ani11030613	2021-01-12	2021-02-23	2021-02-26	42	45	Animals
1030	10.3390/ani11030883	2021-02-04	2021-03-18	2021-03-19	42	43	Animals
1043	10.3390/ani12111376	2022-04-19	2022-05-25	2022-05-27	36	38	Animals
1044	10.3390/ani12111374	2022-03-28	2022-05-24	2022-05-27	57	60	Animals
1045	10.3390/ani12121490	2022-03-28	2022-05-30	2022-06-08	63	72	Animals
1046	10.3390/ani12121580	2022-04-20	2022-06-16	2022-06-19	57	60	Animals
1047	10.3390/ani12111338	2022-03-25	2022-05-23	2022-05-24	59	60	Animals
1048	10.3390/ani12091154	2022-03-26	2022-04-27	2022-04-29	32	34	Animals
1049	10.3390/ani12091052	2022-03-21	2022-04-17	2022-04-19	27	29	Animals
1050	10.3390/ani12091162	2022-02-28	2022-04-27	2022-05-01	58	62	Animals
1051	10.3390/ani12101300	2022-02-27	2022-05-16	2022-05-18	78	80	Animals
1052	10.3390/ani12091183	2022-04-08	2022-05-02	2022-05-05	24	27	Animals
1053	10.3390/ani12070869	2022-02-17	2022-03-27	2022-03-30	38	41	Animals
1054	10.3390/ani12080998	2022-03-29	2022-04-10	2022-04-12	12	14	Animals
1055	10.3390/ani12070895	2022-02-28	2022-03-30	2022-03-31	30	31	Animals
1056	10.3390/ani12070857	2022-02-07	2022-03-25	2022-03-29	46	50	Animals
1057	10.3390/ani12070798	2022-01-17	2022-03-10	2022-03-22	52	64	Animals
1058	10.3390/ani12080972	2022-03-04	2022-04-06	2022-04-08	33	35	Animals
1059	10.3390/ani12070868	2022-02-22	2022-03-19	2022-03-30	25	36	Animals
1060	10.3390/ani12080952	2022-02-22	2022-04-02	2022-04-07	39	44	Animals
1061	10.3390/ani12060723	2021-11-22	2022-03-10	2022-03-13	108	111	Animals
1062	10.3390/ani12060695	2022-01-18	2022-03-07	2022-03-10	48	51	Animals
1063	10.3390/ani12050602	2022-01-03	2022-02-23	2022-02-28	51	56	Animals
1064	10.3390/ani12050635	2022-01-05	2022-03-02	2022-03-02	56	56	Animals
1065	10.3390/ani12060742	2022-01-14	2022-03-08	2022-03-16	53	61	Animals
1066	10.3390/ani12050547	2022-01-16	2022-02-20	2022-02-22	35	37	Animals
1067	10.3390/ani12050625	2022-01-02	2022-02-25	2022-03-01	54	58	Animals
1068	10.3390/ani12050616	2022-02-02	2022-02-25	2022-03-01	23	27	Animals
1069	10.3390/ani12050579	2022-01-02	2022-02-21	2022-02-25	50	54	Animals
1070	10.3390/ani12030265	2021-11-30	2022-01-17	2022-01-21	48	52	Animals
1071	10.3390/ani12030338	2021-12-30	2022-01-28	2022-01-29	29	30	Animals
1072	10.3390/ani12030390	2021-12-23	2022-02-02	2022-02-07	41	46	Animals
1073	10.3390/ani12040440	2022-01-14	2022-02-09	2022-02-11	26	28	Animals
1074	10.3390/ani12040493	2021-12-30	2022-02-13	2022-02-17	45	49	Animals
1075	10.3390/ani12030396	2021-12-15	2022-02-04	2022-02-07	51	54	Animals
1076	10.3390/ani12020187	2021-11-29	2022-01-10	2022-01-13	42	45	Animals
1077	10.3390/ani12020214	2021-11-07	2022-01-12	2022-01-17	66	71	Animals
1078	10.3390/ani12020200	2021-11-16	2022-01-13	2022-01-14	58	59	Animals
1079	10.3390/ani12010058	2021-12-07	2021-12-27	2021-12-28	20	21	Animals
1080	10.3390/ani11123547	2021-09-10	2021-12-11	2021-12-14	92	95	Animals
1081	10.3390/ani11123605	2021-12-02	2021-12-18	2021-12-20	16	18	Animals
1082	10.3390/ani11123433	2021-10-29	2021-11-29	2021-12-01	31	33	Animals
1083	10.3390/ani11123600	2021-10-17	2021-12-15	2021-12-19	59	63	Animals
1084	10.3390/ani11123424	2021-10-18	2021-11-26	2021-12-01	39	44	Animals
1085	10.3390/ani11113310	2021-10-22	2021-11-18	2021-11-19	27	28	Animals
1086	10.3390/ani11113286	2021-10-10	2021-11-15	2021-11-17	36	38	Animals
1087	10.3390/ani11113314	2021-10-14	2021-11-15	2021-11-19	32	36	Animals
1088	10.3390/ani11113098	2021-08-05	2021-10-25	2021-10-29	81	85	Animals
1089	10.3390/ani11113313	2021-09-27	2021-11-10	2021-11-19	44	53	Animals
1090	10.3390/ani11102986	2021-09-08	2021-10-11	2021-10-16	33	38	Animals
1091	10.3390/ani11102852	2021-08-31	2021-09-27	2021-09-29	27	29	Animals
1092	10.3390/ani11102882	2021-08-10	2021-09-29	2021-10-02	50	53	Animals
1093	10.3390/ani11102941	2021-09-14	2021-10-07	2021-10-11	23	27	Animals
1094	10.3390/ani11102812	2021-08-27	2021-09-23	2021-09-27	27	31	Animals
1095	10.3390/ani11092697	2021-07-01	2021-09-09	2021-09-15	70	76	Animals
1096	10.3390/ani11092687	2021-08-10	2021-09-09	2021-09-14	30	35	Animals
1097	10.3390/ani11092553	2021-06-03	2021-08-27	2021-08-30	85	88	Animals
1098	10.3390/ani11092639	2021-07-16	2021-09-06	2021-09-08	52	54	Animals
1099	10.3390/ani11092723	2021-08-11	2021-09-14	2021-09-17	34	37	Animals
1100	10.3390/ani11092484	2021-07-22	2021-08-23	2021-08-24	32	33	Animals
1101	10.3390/ani11092640	2021-07-24	2021-09-04	2021-09-08	42	46	Animals
1102	10.3390/ani11082387	2021-06-11	2021-07-15	2021-08-12	34	62	Animals
1103	10.3390/ani11082374	2021-06-23	2021-08-09	2021-08-11	47	49	Animals
1104	10.3390/ani11082215	2021-05-13	2021-07-05	2021-07-27	53	75	Animals
1105	10.3390/ani11082440	2021-07-14	2021-08-13	2021-08-19	30	36	Animals
1106	10.3390/ani11082403	2021-06-30	2021-08-12	2021-08-14	43	45	Animals
1107	10.3390/ani11082355	2021-06-28	2021-08-06	2021-08-09	39	42	Animals
1108	10.3390/ani11072059	2021-05-09	2021-06-29	2021-07-10	51	62	Animals
1109	10.3390/ani11072122	2021-06-11	2021-07-14	2021-07-16	33	35	Animals
1110	10.3390/ani11071905	2021-05-21	2021-06-22	2021-06-26	32	36	Animals
1111	10.3390/ani11071906	2021-05-11	2021-06-23	2021-06-26	43	46	Animals
1112	10.3390/ani11071936	2021-04-30	2021-06-21	2021-06-29	52	60	Animals
1113	10.3390/ani11071885	2021-05-12	2021-06-22	2021-06-24	41	43	Animals
1114	10.3390/ani11072100	2021-06-15	2021-07-09	2021-07-15	24	30	Animals
1115	10.3390/ani11072005	2021-06-01	2021-07-01	2021-07-05	30	34	Animals
1116	10.3390/ani11071879	2021-05-20	2021-06-21	2021-06-24	32	35	Animals
1117	10.3390/ani11071973	2021-05-24	2021-06-28	2021-07-01	35	38	Animals
1118	10.3390/ani11072013	2021-05-26	2021-07-02	2021-07-05	37	40	Animals
1119	10.3390/ani11072010	2021-05-25	2021-07-02	2021-07-05	38	41	Animals
1120	10.3390/ani11071946	2021-04-17	2021-06-22	2021-06-29	66	73	Animals
1121	10.3390/ani11061736	2021-05-04	2021-06-08	2021-06-10	35	37	Animals
1122	10.3390/ani11061602	2021-05-12	2021-05-27	2021-05-29	15	17	Animals
1123	10.3390/ani11061708	2021-05-24	2021-06-04	2021-06-07	11	14	Animals
1124	10.3390/ani11061582	2021-05-10	2021-05-25	2021-05-28	15	18	Animals
1125	10.3390/ani11061517	2021-03-22	2021-05-20	2021-05-23	59	62	Animals
1126	10.3390/ani11061709	2021-05-20	2021-06-04	2021-06-08	15	19	Animals
1127	10.3390/ani11061745	2021-04-06	2021-06-09	2021-06-11	64	66	Animals
1128	10.3390/ani11061793	2021-05-05	2021-06-10	2021-06-16	36	42	Animals
1129	10.3390/ani11061568	2021-04-21	2021-05-25	2021-05-27	34	36	Animals
1130	10.3390/ani11061703	2021-04-22	2021-06-01	2021-06-07	40	46	Animals
1131	10.3390/ani11051201	2021-03-20	2021-04-20	2021-04-22	31	33	Animals
1132	10.3390/ani11051323	2021-03-04	2021-04-28	2021-05-05	55	62	Animals
1133	10.3390/ani11051266	2021-02-19	2021-03-24	2021-04-28	33	68	Animals
1134	10.3390/ani11051316	2021-03-31	2021-05-01	2021-05-04	31	34	Animals
1135	10.3390/ani11051427	2021-04-08	2021-05-06	2021-05-17	28	39	Animals
1136	10.3390/ani11051435	2021-04-27	2021-05-14	2021-05-17	17	20	Animals
1137	10.3390/ani11051190	2021-03-25	2021-04-19	2021-04-21	25	27	Animals
1138	10.3390/ani11041051	2021-02-23	2021-04-06	2021-04-08	42	44	Animals
1139	10.3390/ani11041096	2021-03-16	2021-04-08	2021-04-12	23	27	Animals
1140	10.3390/ani11041079	2021-02-24	2021-04-08	2021-04-09	43	44	Animals
1141	10.3390/ani11040983	2021-02-08	2021-03-26	2021-04-01	46	52	Animals
1142	10.3390/ani11041183	2021-02-27	2021-04-17	2021-04-20	49	52	Animals
1143	10.3390/ani11041147	2021-03-25	2021-04-16	2021-04-17	22	23	Animals
1144	10.3390/ani11041040	2021-03-10	2021-04-02	2021-04-07	23	28	Animals
1145	10.3390/ani11041175	2021-04-01	2021-04-16	2021-04-20	15	19	Animals
1146	10.3390/ani11041086	2021-03-12	2021-04-08	2021-04-10	27	29	Animals
1147	10.3390/ani11030886	2021-02-03	2021-03-17	2021-03-20	42	45	Animals
1148	10.3390/ani11030692	2021-01-16	2021-02-25	2021-03-05	40	48	Animals
1149	10.3390/ani11030741	2021-02-09	2021-03-06	2021-03-08	25	27	Animals
1167	10.3390/ani12121551	2022-05-23	2022-06-13	2022-06-15	21	23	Animals
1168	10.3390/ani12121521	2022-04-28	2022-06-09	2022-06-11	42	44	Animals
1169	10.3390/ani12121482	2022-04-26	2022-06-05	2022-06-08	40	43	Animals
1170	10.3390/ani12111439	2022-05-02	2022-05-25	2022-06-02	23	31	Animals
1171	10.3390/ani12111345	2022-03-30	2022-05-18	2022-05-25	49	56	Animals
1172	10.3390/ani12101263	2022-04-09	2022-05-12	2022-05-14	33	35	Animals
1173	10.3390/ani12091223	2022-04-05	2022-05-06	2022-05-09	31	34	Animals
1174	10.3390/ani12101278	2022-04-13	2022-05-13	2022-05-17	30	34	Animals
1175	10.3390/ani12101255	2022-03-27	2022-05-09	2022-05-13	43	47	Animals
1176	10.3390/ani12091119	2022-03-09	2022-04-25	2022-04-27	47	49	Animals
1177	10.3390/ani12101269	2022-04-05	2022-05-14	2022-05-15	39	40	Animals
1178	10.3390/ani12070927	2022-02-19	2022-04-01	2022-04-04	41	44	Animals
1179	10.3390/ani12060707	2022-01-18	2022-03-09	2022-03-11	50	52	Animals
1180	10.3390/ani12060720	2022-01-31	2022-03-10	2022-03-12	38	40	Animals
1181	10.3390/ani12050556	2021-12-28	2022-02-18	2022-02-23	52	57	Animals
1182	10.3390/ani12060682	2022-02-10	2022-03-07	2022-03-09	25	27	Animals
1183	10.3390/ani12060796	2022-02-15	2022-03-19	2022-03-21	32	34	Animals
1184	10.3390/ani12060727	2022-02-23	2022-03-10	2022-03-14	15	19	Animals
1185	10.3390/ani12040509	2021-12-11	2022-02-11	2022-02-18	62	69	Animals
1186	10.3390/ani12040432	2021-12-16	2022-02-07	2022-02-11	53	57	Animals
1187	10.3390/ani12040428	2021-12-10	2021-12-31	2022-02-11	21	63	Animals
1188	10.3390/ani12030301	2021-12-23	2022-01-23	2022-01-26	31	34	Animals
1189	10.3390/ani12040485	2021-12-31	2022-02-14	2022-02-16	45	47	Animals
1190	10.3390/ani12040472	2021-12-08	2022-02-11	2022-02-14	65	68	Animals
1191	10.3390/ani12030401	2022-01-14	2022-02-02	2022-02-08	19	25	Animals
1192	10.3390/ani12020177	2021-11-26	2022-01-09	2022-01-12	44	47	Animals
1193	10.3390/ani12010017	2021-10-19	2021-12-16	2021-12-22	58	64	Animals
1194	10.3390/ani12010026	2021-10-12	2021-12-21	2021-12-23	70	72	Animals
1195	10.3390/ani12010028	2021-11-02	2021-12-20	2021-12-23	48	51	Animals
1196	10.3390/ani12010061	2021-11-30	2021-12-23	2021-12-28	23	28	Animals
1197	10.3390/ani12020157	2021-11-25	2022-01-06	2022-01-10	42	46	Animals
1198	10.3390/ani12010119	2021-11-01	2022-01-01	2022-01-04	61	64	Animals
1199	10.3390/ani12020205	2021-11-29	2022-01-11	2022-01-15	43	47	Animals
1200	10.3390/ani12020194	2021-12-07	2022-01-10	2022-01-13	34	37	Animals
1201	10.3390/ani11123561	2021-11-04	2021-12-01	2021-12-15	27	41	Animals
1202	10.3390/ani11123490	2021-11-02	2021-12-02	2021-12-07	30	35	Animals
1203	10.3390/ani11123586	2021-11-12	2021-12-09	2021-12-17	27	35	Animals
1204	10.3390/ani11123585	2021-10-22	2021-12-14	2021-12-17	53	56	Animals
1205	10.3390/ani11123526	2021-09-29	2021-11-26	2021-12-10	58	72	Animals
1206	10.3390/ani11123459	2021-11-04	2021-12-03	2021-12-05	29	31	Animals
1207	10.3390/ani11123374	2021-10-22	2021-11-23	2021-11-25	32	34	Animals
1208	10.3390/ani11123483	2021-10-21	2021-12-05	2021-12-07	45	47	Animals
1209	10.3390/ani11123379	2021-07-17	2021-11-24	2021-11-25	130	131	Animals
1210	10.3390/ani11113220	2021-09-30	2021-11-09	2021-11-11	40	42	Animals
1211	10.3390/ani11113077	2021-09-30	2021-10-26	2021-10-28	26	28	Animals
1212	10.3390/ani11113147	2021-09-12	2021-11-03	2021-11-04	52	53	Animals
1213	10.3390/ani11113128	2021-09-28	2021-10-31	2021-11-01	33	34	Animals
1214	10.3390/ani11113326	2021-09-18	2021-11-17	2021-11-22	60	65	Animals
1215	10.3390/ani11113166	2021-09-13	2021-11-02	2021-11-05	50	53	Animals
1216	10.3390/ani11113038	2021-09-10	2021-10-21	2021-10-22	41	42	Animals
1217	10.3390/ani11113146	2021-09-30	2021-10-30	2021-11-04	30	35	Animals
1218	10.3390/ani11102896	2021-07-28	2021-09-30	2021-10-05	64	69	Animals
1219	10.3390/ani11102962	2021-08-31	2021-10-11	2021-10-14	41	44	Animals
1220	10.3390/ani11102897	2021-09-14	2021-10-01	2021-10-05	17	21	Animals
1221	10.3390/ani11102848	2021-07-23	2021-09-26	2021-09-29	65	68	Animals
1222	10.3390/ani11103005	2021-08-26	2021-10-05	2021-10-19	40	54	Animals
1223	10.3390/ani11102940	2021-04-04	2021-09-30	2021-10-11	179	190	Animals
1224	10.3390/ani11092524	2021-07-21	2021-08-25	2021-08-27	35	37	Animals
1225	10.3390/ani11092702	2021-07-30	2021-09-13	2021-09-15	45	47	Animals
1226	10.3390/ani11082276	2021-05-30	2021-06-29	2021-08-02	30	64	Animals
1227	10.3390/ani11082389	2021-05-03	2021-06-15	2021-08-13	43	102	Animals
1228	10.3390/ani11082351	2021-07-13	2021-08-05	2021-08-09	23	27	Animals
1229	10.3390/ani11082378	2021-06-30	2021-08-09	2021-08-12	40	43	Animals
1230	10.3390/ani11082207	2021-06-21	2021-07-23	2021-07-26	32	35	Animals
1231	10.3390/ani11082295	2021-06-22	2021-07-30	2021-08-04	38	43	Animals
1232	10.3390/ani11082301	2021-06-25	2021-08-01	2021-08-04	37	40	Animals
1233	10.3390/ani11082163	2021-06-29	2021-07-21	2021-07-22	22	23	Animals
1234	10.3390/ani11071856	2021-05-07	2021-06-18	2021-06-22	42	46	Animals
1235	10.3390/ani11072035	2021-06-14	2021-07-05	2021-07-08	21	24	Animals
1236	10.3390/ani11072132	2021-05-23	2021-07-13	2021-07-19	51	57	Animals
1237	10.3390/ani11071926	2021-05-28	2021-06-23	2021-06-28	26	31	Animals
1238	10.3390/ani11071908	2021-06-10	2021-06-23	2021-06-26	13	16	Animals
1239	10.3390/ani11072119	2021-05-21	2021-07-14	2021-07-16	54	56	Animals
1240	10.3390/ani11071868	2021-05-11	2021-06-18	2021-06-23	38	43	Animals
1241	10.3390/ani11061637	2021-04-23	2021-05-28	2021-06-01	35	39	Animals
1242	10.3390/ani11061837	2021-05-22	2021-06-14	2021-06-21	23	30	Animals
1243	10.3390/ani11061507	2021-03-31	2021-05-19	2021-05-22	49	52	Animals
1244	10.3390/ani11061788	2021-04-22	2021-06-10	2021-06-15	49	54	Animals
1245	10.3390/ani11061592	2021-03-26	2021-05-27	2021-05-28	62	63	Animals
1246	10.3390/ani11061560	2021-04-09	2021-05-16	2021-05-27	37	48	Animals
1247	10.3390/ani11061802	2021-05-11	2021-06-11	2021-06-17	31	37	Animals
1248	10.3390/ani11061667	2021-04-21	2021-05-28	2021-06-03	37	43	Animals
1249	10.3390/ani11051210	2021-03-15	2021-04-20	2021-04-22	36	38	Animals
1250	10.3390/ani11051231	2021-01-20	2021-04-22	2021-04-24	92	94	Animals
1251	10.3390/ani11051298	2021-03-04	2021-04-28	2021-04-30	55	57	Animals
1252	10.3390/ani11051328	2021-02-28	2021-04-18	2021-05-07	49	68	Animals
1253	10.3390/ani11051252	2021-03-24	2021-04-22	2021-04-26	29	33	Animals
1254	10.3390/ani11051467	2021-03-26	2021-05-12	2021-05-20	47	55	Animals
1255	10.3390/ani11051293	2021-03-04	2021-04-28	2021-04-30	55	57	Animals
1256	10.3390/ani11051388	2021-04-19	2021-05-11	2021-05-13	22	24	Animals
1257	10.3390/ani11051307	2020-11-10	2021-04-27	2021-05-01	168	172	Animals
1258	10.3390/ani11051458	2021-03-31	2021-05-15	2021-05-19	45	49	Animals
1259	10.3390/ani11051365	2021-03-16	2021-05-07	2021-05-11	52	56	Animals
1260	10.3390/ani11041060	2021-03-14	2021-04-06	2021-04-08	23	25	Animals
1261	10.3390/ani11041138	2021-02-19	2021-04-08	2021-04-16	48	56	Animals
1262	10.3390/ani11041094	2021-03-10	2021-04-06	2021-04-12	27	33	Animals
1263	10.3390/ani11040974	2021-02-15	2021-03-27	2021-03-31	40	44	Animals
1264	10.3390/ani11040944	2021-02-18	2021-03-24	2021-03-27	34	37	Animals
1265	10.3390/ani11041155	2021-03-15	2021-04-16	2021-04-17	32	33	Animals
1266	10.3390/ani11041146	2021-02-10	2021-03-01	2021-04-16	19	65	Animals
1267	10.3390/ani11041108	2021-02-27	2021-04-09	2021-04-13	41	45	Animals
1268	10.3390/ani11041169	2021-02-04	2021-04-15	2021-04-19	70	74	Animals
1269	10.3390/ani11030647	2020-12-23	2021-02-24	2021-03-01	63	68	Animals
1270	10.3390/ani11030617	2021-01-06	2021-02-22	2021-02-26	47	51	Animals
1271	10.3390/ani11030871	2021-02-22	2021-03-08	2021-03-18	14	24	Animals
1272	10.3390/ani11030841	2021-02-22	2021-03-12	2021-03-16	18	22	Animals
1273	10.3390/ani11030597	2021-01-08	2021-02-18	2021-02-24	41	47	Animals
1274	10.3390/ani11030853	2021-01-29	2021-03-15	2021-03-17	45	47	Animals
1275	10.3390/ani11030869	2021-01-22	2021-03-16	2021-03-18	53	55	Animals
1276	10.3390/ani11030593	2021-01-13	2021-02-19	2021-02-24	37	42	Animals
1291	10.3390/ani12121586	2022-05-21	2022-06-16	2022-06-20	26	30	Animals
1292	10.3390/ani12121473	2022-04-23	2022-06-01	2022-06-07	39	45	Animals
1293	10.3390/ani12111346	2022-03-28	2022-05-23	2022-05-25	56	58	Animals
1294	10.3390/ani12111393	2022-04-01	2022-05-25	2022-05-28	54	57	Animals
1295	10.3390/ani12121474	2022-05-08	2022-06-05	2022-06-07	28	30	Animals
1296	10.3390/ani12101331	2022-04-28	2022-05-21	2022-05-23	23	25	Animals
1297	10.3390/ani12101312	2022-03-22	2022-05-18	2022-05-20	57	59	Animals
1298	10.3390/ani12101307	2022-03-01	2022-05-16	2022-05-20	76	80	Animals
1299	10.3390/ani12081007	2022-03-13	2022-04-11	2022-04-13	29	31	Animals
1300	10.3390/ani12080958	2022-01-30	2022-03-31	2022-04-08	60	68	Animals
1301	10.3390/ani12081015	2022-03-13	2022-04-12	2022-04-13	30	31	Animals
1302	10.3390/ani12070920	2021-10-16	2022-04-01	2022-04-04	167	170	Animals
1303	10.3390/ani12070903	2022-01-31	2022-03-29	2022-03-31	57	59	Animals
1304	10.3390/ani12080973	2022-03-07	2022-04-07	2022-04-09	31	33	Animals
1305	10.3390/ani12070900	2022-02-23	2022-03-28	2022-03-31	33	36	Animals
1306	10.3390/ani12081008	2022-03-10	2022-04-11	2022-04-13	32	34	Animals
1307	10.3390/ani12070886	2022-03-01	2022-03-26	2022-03-31	25	30	Animals
1308	10.3390/ani12060736	2022-01-05	2022-03-11	2022-03-15	65	69	Animals
1309	10.3390/ani12050641	2021-12-15	2022-02-16	2022-03-03	63	78	Animals
1310	10.3390/ani12050585	2022-01-10	2022-02-21	2022-02-25	42	46	Animals
1311	10.3390/ani12050593	2022-01-26	2022-02-24	2022-02-27	29	32	Animals
1312	10.3390/ani12060713	2022-02-04	2022-03-09	2022-03-11	33	35	Animals
1313	10.3390/ani12050551	2021-12-17	2022-02-18	2022-02-23	63	68	Animals
1314	10.3390/ani12050537	2022-01-11	2022-02-18	2022-02-22	38	42	Animals
1315	10.3390/ani12050569	2021-12-29	2022-02-21	2022-02-24	54	57	Animals
1316	10.3390/ani12060786	2022-02-15	2022-03-18	2022-03-20	31	33	Animals
1317	10.3390/ani12040484	2021-09-23	2022-02-07	2022-02-16	137	146	Animals
1318	10.3390/ani12030258	2021-11-24	2022-01-18	2022-01-21	55	58	Animals
1319	10.3390/ani12030367	2021-11-16	2022-01-30	2022-02-02	75	78	Animals
1320	10.3390/ani12030248	2021-10-23	2022-01-18	2022-01-20	87	89	Animals
1321	10.3390/ani12030315	2021-12-22	2022-01-26	2022-01-27	35	36	Animals
1322	10.3390/ani12040476	2021-12-11	2022-01-25	2022-02-15	45	66	Animals
1323	10.3390/ani12030393	2021-12-31	2022-02-06	2022-02-08	37	39	Animals
1324	10.3390/ani12030240	2021-12-09	2022-01-16	2022-01-19	38	41	Animals
1325	10.3390/ani12010072	2021-10-13	2021-12-23	2021-12-29	71	77	Animals
1326	10.3390/ani12010095	2021-12-13	2021-12-30	2021-12-31	17	18	Animals
1327	10.3390/ani12020152	2021-11-30	2022-01-07	2022-01-08	38	39	Animals
1328	10.3390/ani11123348	2021-11-04	2021-11-22	2021-11-23	18	19	Animals
1329	10.3390/ani11123531	2021-11-11	2021-12-10	2021-12-11	29	30	Animals
1330	10.3390/ani11123549	2021-11-17	2021-12-09	2021-12-14	22	27	Animals
1331	10.3390/ani11123340	2021-11-03	2021-11-18	2021-11-23	15	20	Animals
1332	10.3390/ani11123401	2021-11-11	2021-11-26	2021-11-29	15	18	Animals
1333	10.3390/ani11123414	2021-11-02	2021-11-26	2021-11-30	24	28	Animals
1334	10.3390/ani11123513	2021-11-16	2021-12-04	2021-12-09	18	23	Animals
1335	10.3390/ani11123521	2021-11-10	2021-12-02	2021-12-10	22	30	Animals
1336	10.3390/ani11123435	2021-08-03	2021-09-03	2021-12-01	31	120	Animals
1337	10.3390/ani11113330	2021-10-18	2021-11-17	2021-11-22	30	35	Animals
1338	10.3390/ani11113112	2021-10-10	2021-10-27	2021-10-30	17	20	Animals
1339	10.3390/ani11113200	2021-10-14	2021-11-08	2021-11-09	25	26	Animals
1340	10.3390/ani11113019	2021-07-29	2021-10-18	2021-10-20	81	83	Animals
1341	10.3390/ani11113303	2021-10-08	2021-11-16	2021-11-19	39	42	Animals
1342	10.3390/ani11113233	2021-10-13	2021-11-09	2021-11-12	27	30	Animals
1343	10.3390/ani11102959	2021-04-29	2021-10-09	2021-10-14	163	168	Animals
1344	10.3390/ani11102873	2021-08-17	2021-09-28	2021-09-30	42	44	Animals
1345	10.3390/ani11102765	2021-08-30	2021-09-09	2021-09-22	10	23	Animals
1346	10.3390/ani11102937	2021-09-14	2021-10-07	2021-10-11	23	27	Animals
1347	10.3390/ani11102850	2021-08-18	2021-09-28	2021-09-29	41	42	Animals
1348	10.3390/ani11102770	2021-07-19	2021-09-18	2021-09-23	61	66	Animals
1349	10.3390/ani11092739	2021-06-30	2021-09-16	2021-09-19	78	81	Animals
1350	10.3390/ani11092642	2021-08-03	2021-09-08	2021-09-09	36	37	Animals
1351	10.3390/ani11092727	2021-08-28	2021-09-16	2021-09-18	19	21	Animals
1352	10.3390/ani11092750	2021-07-23	2021-09-15	2021-09-20	54	59	Animals
1353	10.3390/ani11092493	2021-07-20	2021-08-23	2021-08-25	34	36	Animals
1354	10.3390/ani11092594	2021-06-30	2021-08-26	2021-09-03	57	65	Animals
1355	10.3390/ani11092631	2021-07-01	2021-09-02	2021-09-07	63	68	Animals
1356	10.3390/ani11092567	2021-07-28	2021-08-28	2021-08-31	31	34	Animals
1357	10.3390/ani11092613	2021-07-29	2021-08-31	2021-09-06	33	39	Animals
1358	10.3390/ani11092491	2021-07-12	2021-08-23	2021-08-25	42	44	Animals
1359	10.3390/ani11082314	2021-07-06	2021-07-30	2021-08-05	24	30	Animals
1360	10.3390/ani11082224	2021-06-25	2021-07-26	2021-07-28	31	33	Animals
1361	10.3390/ani11082285	2021-06-11	2021-07-29	2021-08-03	48	53	Animals
1362	10.3390/ani11082284	2021-07-06	2021-07-30	2021-08-03	24	28	Animals
1363	10.3390/ani11082329	2021-06-15	2021-07-14	2021-08-07	29	53	Animals
1364	10.3390/ani11082363	2021-07-22	2021-08-08	2021-08-10	17	19	Animals
1365	10.3390/ani11082231	2021-06-18	2021-07-20	2021-07-29	32	41	Animals
1366	10.3390/ani11082279	2021-07-12	2021-07-30	2021-08-02	18	21	Animals
1367	10.3390/ani11082237	2021-05-19	2021-07-27	2021-07-29	69	71	Animals
1368	10.3390/ani11082176	2021-06-23	2021-07-20	2021-07-22	27	29	Animals
1369	10.3390/ani11082265	2021-07-15	2021-07-26	2021-07-31	11	16	Animals
1370	10.3390/ani11082411	2021-06-26	2021-08-02	2021-08-15	37	50	Animals
1371	10.3390/ani11082376	2021-06-29	2021-08-09	2021-08-12	41	44	Animals
1372	10.3390/ani11082180	2021-06-28	2021-07-20	2021-07-23	22	25	Animals
1373	10.3390/ani11071951	2021-05-12	2021-06-25	2021-06-30	44	49	Animals
1374	10.3390/ani11071852	2021-05-18	2021-06-16	2021-06-22	29	35	Animals
1375	10.3390/ani11071874	2021-05-21	2021-06-21	2021-06-23	31	33	Animals
1376	10.3390/ani11072029	2021-05-15	2021-07-05	2021-07-07	51	53	Animals
1377	10.3390/ani11072079	2021-06-02	2021-07-10	2021-07-12	38	40	Animals
1378	10.3390/ani11072045	2020-12-17	2020-12-30	2021-07-08	13	203	Animals
1379	10.3390/ani11071974	2021-05-22	2021-06-28	2021-07-02	37	41	Animals
1380	10.3390/ani11072004	2021-05-28	2021-07-02	2021-07-05	35	38	Animals
1381	10.3390/ani11061589	2021-04-23	2021-05-25	2021-05-28	32	35	Animals
1382	10.3390/ani11061715	2021-05-06	2021-06-04	2021-06-08	29	33	Animals
1383	10.3390/ani11061629	2021-04-07	2021-05-22	2021-05-31	45	54	Animals
1384	10.3390/ani11061610	2021-04-08	2021-05-26	2021-05-29	48	51	Animals
1385	10.3390/ani11061652	2021-05-11	2021-05-30	2021-06-02	19	22	Animals
1386	10.3390/ani11061503	2021-05-07	2021-05-17	2021-05-22	10	15	Animals
1387	10.3390/ani11061681	2021-03-16	2021-05-17	2021-06-04	62	80	Animals
1388	10.3390/ani11061657	2021-04-14	2021-05-31	2021-06-02	47	49	Animals
1389	10.3390/ani11051198	2021-03-19	2021-04-19	2021-04-22	31	34	Animals
1390	10.3390/ani11051217	2021-03-20	2021-04-21	2021-04-23	32	34	Animals
1391	10.3390/ani11051246	2021-03-31	2021-04-22	2021-04-26	22	26	Animals
1392	10.3390/ani11051407	2021-03-15	2021-05-13	2021-05-14	59	60	Animals
1393	10.3390/ani11051223	2021-03-26	2021-04-21	2021-04-23	26	28	Animals
1394	10.3390/ani11051309	2021-04-16	2021-04-30	2021-05-02	14	16	Animals
1395	10.3390/ani11051302	2021-03-29	2021-04-26	2021-04-30	28	32	Animals
1396	10.3390/ani11041111	2021-02-25	2021-04-08	2021-04-13	42	47	Animals
1397	10.3390/ani11041022	2021-03-04	2021-03-31	2021-04-05	27	32	Animals
1398	10.3390/ani11041117	2021-03-10	2021-04-12	2021-04-13	33	34	Animals
1399	10.3390/ani11041093	2021-03-24	2021-04-08	2021-04-12	15	19	Animals
1400	10.3390/ani11041087	2021-03-08	2021-04-08	2021-04-10	31	33	Animals
1401	10.3390/ani11041126	2021-03-13	2021-04-12	2021-04-14	30	32	Animals
1402	10.3390/ani11040970	2021-02-20	2021-03-09	2021-03-31	17	39	Animals
1403	10.3390/ani11041178	2021-03-21	2021-04-17	2021-04-20	27	30	Animals
1404	10.3390/ani11041168	2021-03-25	2021-04-15	2021-04-19	21	25	Animals
1405	10.3390/ani11041052	2021-03-08	2021-04-05	2021-04-08	28	31	Animals
1406	10.3390/ani11030749	2021-01-24	2021-03-03	2021-03-09	38	44	Animals
1407	10.3390/ani11030911	2021-02-22	2021-03-19	2021-03-22	25	28	Animals
1408	10.3390/ani11030801	2021-02-08	2021-03-09	2021-03-12	29	32	Animals
1409	10.3390/ani11030716	2021-02-02	2021-03-02	2021-03-06	28	32	Animals
1422	10.3390/ani12111400	2022-04-16	2022-05-27	2022-05-29	41	43	Animals
1423	10.3390/ani12111379	2022-04-28	2022-05-24	2022-05-27	26	29	Animals
1424	10.3390/ani12121492	2022-04-28	2022-06-06	2022-06-08	39	41	Animals
1425	10.3390/ani12121583	2022-04-27	2022-06-17	2022-06-19	51	53	Animals
1426	10.3390/ani12121582	2022-05-19	2022-06-17	2022-06-19	29	31	Animals
1427	10.3390/ani12111341	2022-03-08	2022-05-22	2022-05-25	75	78	Animals
1428	10.3390/ani12091170	2022-04-08	2022-04-29	2022-05-03	21	25	Animals
1429	10.3390/ani12101227	2022-04-05	2022-05-05	2022-05-10	30	35	Animals
1430	10.3390/ani12101309	2022-03-29	2022-05-11	2022-05-20	43	52	Animals
1431	10.3390/ani12101329	2022-03-19	2022-05-18	2022-05-23	60	65	Animals
1432	10.3390/ani12091176	2022-03-21	2022-04-30	2022-05-04	40	44	Animals
1433	10.3390/ani12101234	2022-03-20	2022-05-09	2022-05-11	50	52	Animals
1434	10.3390/ani12091121	2022-03-28	2022-04-26	2022-04-27	29	30	Animals
1435	10.3390/ani12091199	2022-01-31	2022-05-04	2022-05-06	93	95	Animals
1436	10.3390/ani12091189	2022-02-04	2022-05-04	2022-05-06	89	91	Animals
1437	10.3390/ani12070901	2022-01-24	2022-03-14	2022-03-31	49	66	Animals
1438	10.3390/ani12070921	2022-02-27	2022-04-01	2022-04-04	33	36	Animals
1439	10.3390/ani12070874	2022-01-16	2022-03-14	2022-03-30	57	73	Animals
1440	10.3390/ani12070804	2022-02-11	2022-03-20	2022-03-22	37	39	Animals
1441	10.3390/ani12070829	2022-02-21	2022-03-23	2022-03-24	30	31	Animals
1442	10.3390/ani12080970	2022-03-04	2022-04-01	2022-04-08	28	35	Animals
1443	10.3390/ani12081002	2022-03-07	2022-04-11	2022-04-13	35	37	Animals
1444	10.3390/ani12060681	2022-01-27	2022-03-05	2022-03-08	37	40	Animals
1445	10.3390/ani12060731	2022-01-07	2022-03-11	2022-03-14	63	66	Animals
1446	10.3390/ani12060793	2022-02-01	2022-03-15	2022-03-21	42	48	Animals
1447	10.3390/ani12060787	2022-01-30	2022-03-16	2022-03-20	45	49	Animals
1448	10.3390/ani12030366	2021-12-23	2022-01-28	2022-02-02	36	41	Animals
1449	10.3390/ani12040431	2022-01-22	2022-02-09	2022-02-11	18	20	Animals
1450	10.3390/ani12030270	2021-12-17	2022-01-20	2022-01-22	34	36	Animals
1451	10.3390/ani12040531	2022-01-10	2022-02-18	2022-02-21	39	42	Animals
1452	10.3390/ani12020189	2021-12-08	2022-01-10	2022-01-13	33	36	Animals
1453	10.3390/ani12020139	2021-11-20	2022-01-05	2022-01-07	46	48	Animals
1454	10.3390/ani12020160	2021-11-05	2022-01-04	2022-01-10	60	66	Animals
1455	10.3390/ani11123457	2021-09-30	2021-12-02	2021-12-04	63	65	Animals
1456	10.3390/ani11123534	2021-11-02	2021-12-09	2021-12-11	37	39	Animals
1457	10.3390/ani11123336	2021-11-10	2021-11-20	2021-11-23	10	13	Animals
1458	10.3390/ani11123596	2021-10-20	2021-12-17	2021-12-19	58	60	Animals
1459	10.3390/ani11123604	2021-10-18	2021-12-16	2021-12-20	59	63	Animals
1460	10.3390/ani11123509	2021-11-22	2021-12-07	2021-12-09	15	17	Animals
1461	10.3390/ani11113335	2021-11-05	2021-11-19	2021-11-22	14	17	Animals
1462	10.3390/ani11113180	2021-10-19	2021-11-05	2021-11-07	17	19	Animals
1463	10.3390/ani11113297	2021-10-12	2021-11-16	2021-11-18	35	37	Animals
1464	10.3390/ani11113061	2021-07-27	2021-10-25	2021-10-26	90	91	Animals
1465	10.3390/ani11113249	2021-09-28	2021-11-11	2021-11-13	44	46	Animals
1466	10.3390/ani11113218	2021-09-22	2021-11-08	2021-11-11	47	50	Animals
1467	10.3390/ani11113021	2021-09-03	2021-09-29	2021-10-20	26	47	Animals
1468	10.3390/ani11102794	2021-08-09	2021-09-21	2021-09-25	43	47	Animals
1469	10.3390/ani11102811	2021-08-01	2021-09-20	2021-09-27	50	57	Animals
1470	10.3390/ani11102777	2021-08-04	2021-09-21	2021-09-23	48	50	Animals
1471	10.3390/ani11102816	2021-08-02	2021-09-23	2021-09-27	52	56	Animals
1472	10.3390/ani11102978	2021-08-23	2021-10-02	2021-10-15	40	53	Animals
1473	10.3390/ani11102905	2021-09-02	2021-09-29	2021-10-08	27	36	Animals
1474	10.3390/ani11092657	2021-08-18	2021-09-07	2021-09-10	20	23	Animals
1475	10.3390/ani11092664	2021-08-10	2021-09-07	2021-09-10	28	31	Animals
1476	10.3390/ani11092527	2021-07-15	2021-08-25	2021-08-28	41	44	Animals
1477	10.3390/ani11092487	2021-07-16	2021-08-20	2021-08-25	35	40	Animals
1478	10.3390/ani11092738	2021-08-25	2021-09-15	2021-09-19	21	25	Animals
1479	10.3390/ani11092743	2021-07-04	2021-09-14	2021-09-19	72	77	Animals
1480	10.3390/ani11092675	2021-08-23	2021-09-09	2021-09-12	17	20	Animals
1481	10.3390/ani11092569	2021-05-17	2021-07-26	2021-08-31	70	106	Animals
1482	10.3390/ani11082469	2021-06-22	2021-08-21	2021-08-23	60	62	Animals
1483	10.3390/ani11082421	2021-07-06	2021-08-13	2021-08-17	38	42	Animals
1484	10.3390/ani11082454	2021-07-01	2021-08-18	2021-08-20	48	50	Animals
1485	10.3390/ani11082431	2021-07-16	2021-08-10	2021-08-18	25	33	Animals
1486	10.3390/ani11082219	2021-06-29	2021-07-22	2021-07-27	23	28	Animals
1487	10.3390/ani11082165	2021-07-06	2021-07-21	2021-07-22	15	16	Animals
1488	10.3390/ani11082298	2021-07-09	2021-08-02	2021-08-04	24	26	Animals
1489	10.3390/ani11082326	2021-07-05	2021-08-03	2021-08-06	29	32	Animals
1490	10.3390/ani11082274	2021-06-11	2021-07-30	2021-08-01	49	51	Animals
1491	10.3390/ani11071960	2021-05-09	2021-06-24	2021-06-30	46	52	Animals
1492	10.3390/ani11071888	2021-04-27	2021-06-21	2021-06-25	55	59	Animals
1493	10.3390/ani11071920	2021-05-19	2021-06-24	2021-06-28	36	40	Animals
1494	10.3390/ani11072117	2021-05-20	2021-07-07	2021-07-16	48	57	Animals
1495	10.3390/ani11071985	2021-06-02	2021-06-30	2021-07-02	28	30	Animals
1496	10.3390/ani11071934	2021-05-11	2021-06-25	2021-06-29	45	49	Animals
1497	10.3390/ani11071939	2021-05-07	2021-06-22	2021-06-29	46	53	Animals
1498	10.3390/ani11061672	2021-05-12	2021-06-01	2021-06-03	20	22	Animals
1499	10.3390/ani11061711	2021-04-22	2021-06-04	2021-06-08	43	47	Animals
1500	10.3390/ani11061746	2021-04-25	2021-06-09	2021-06-11	45	47	Animals
1501	10.3390/ani11061781	2021-05-03	2021-06-11	2021-06-15	39	43	Animals
1502	10.3390/ani11061545	2021-05-06	2021-05-24	2021-05-25	18	19	Animals
1503	10.3390/ani11061752	2021-04-22	2021-06-02	2021-06-11	41	50	Animals
1504	10.3390/ani11061486	2021-04-20	2021-05-19	2021-05-21	29	31	Animals
1505	10.3390/ani11061623	2021-05-11	2021-05-27	2021-05-31	16	20	Animals
1506	10.3390/ani11061571	2021-04-27	2021-05-24	2021-05-27	27	30	Animals
1507	10.3390/ani11061645	2021-04-28	2021-05-28	2021-06-01	30	34	Animals
1508	10.3390/ani11061504	2021-04-09	2021-05-20	2021-05-22	41	43	Animals
1509	10.3390/ani11061606	2021-02-26	2021-05-26	2021-05-29	89	92	Animals
1510	10.3390/ani11051368	2021-03-22	2021-05-08	2021-05-12	47	51	Animals
1511	10.3390/ani11051380	2021-03-26	2021-05-10	2021-05-12	45	47	Animals
1512	10.3390/ani11051204	2021-03-08	2021-04-19	2021-04-22	42	45	Animals
1513	10.3390/ani11051314	2021-03-30	2021-05-01	2021-05-03	32	34	Animals
1514	10.3390/ani11051438	2021-03-07	2021-04-29	2021-05-18	53	72	Animals
1515	10.3390/ani11051265	2021-03-04	2021-04-26	2021-04-28	53	55	Animals
1516	10.3390/ani11051272	2021-04-07	2021-04-26	2021-04-28	19	21	Animals
1517	10.3390/ani11051322	2021-03-12	2021-04-30	2021-05-05	49	54	Animals
1518	10.3390/ani11051337	2021-01-11	2021-05-04	2021-05-08	113	117	Animals
1519	10.3390/ani11041136	2021-03-11	2021-04-14	2021-04-15	34	35	Animals
1520	10.3390/ani11041048	2021-02-20	2021-04-02	2021-04-08	41	47	Animals
1521	10.3390/ani11041081	2021-03-11	2021-04-07	2021-04-10	27	30	Animals
1522	10.3390/ani11040936	2021-02-23	2021-03-23	2021-03-25	28	30	Animals
1523	10.3390/ani11041149	2021-03-09	2021-04-15	2021-04-17	37	39	Animals
1524	10.3390/ani11040955	2021-02-27	2021-03-24	2021-03-30	25	31	Animals
1525	10.3390/ani11041004	2021-02-18	2021-03-31	2021-04-02	41	43	Animals
1526	10.3390/ani11041165	2021-03-06	2021-04-16	2021-04-19	41	44	Animals
1527	10.3390/ani11030814	2021-02-25	2021-03-11	2021-03-14	14	17	Animals
1528	10.3390/ani11030832	2021-02-17	2021-03-12	2021-03-16	23	27	Animals
1529	10.3390/ani11030875	2021-02-14	2021-03-16	2021-03-19	30	33	Animals
1530	10.3390/ani11030706	2021-01-31	2021-02-26	2021-03-05	26	33	Animals
1531	10.3390/ani11030684	2021-01-31	2021-02-27	2021-03-04	27	32	Animals
1532	10.3390/ani11030879	2021-02-01	2021-03-16	2021-03-19	43	46	Animals
1533	10.3390/ani11030713	2021-01-11	2021-02-25	2021-03-05	45	53	Animals
1534	10.3390/ani11030744	2020-12-29	2021-02-25	2021-03-09	58	70	Animals
1535	10.3390/ani11030833	2021-01-29	2021-03-12	2021-03-16	42	46	Animals
1536	10.3390/ani11030720	2021-02-04	2021-03-02	2021-03-06	26	30	Animals
1537	10.3390/ani11030672	2020-12-09	2021-02-25	2021-03-03	78	84	Animals
1538	10.3390/ani11030612	2021-01-29	2021-02-20	2021-02-26	22	28	Animals
1539	10.3390/ani11030858	2020-11-20	2021-01-08	2021-03-18	49	118	Animals
1540	10.3390/ani11030663	2021-01-21	2021-02-25	2021-03-02	35	40	Animals
1541	10.3390/ani11030910	2021-02-28	2021-03-17	2021-03-22	17	22	Animals
1542	10.3390/ani11030772	2021-02-02	2021-03-08	2021-03-11	34	37	Animals
1543	10.3390/ani11030586	2020-12-09	2021-02-11	2021-02-24	64	77	Animals
1544	10.3390/ani11030701	2021-01-24	2021-03-02	2021-03-05	37	40	Animals
1545	10.3390/ani11030622	2020-12-23	2021-02-18	2021-02-26	57	65	Animals
1546	10.3390/ani11030730	2021-02-01	2021-03-03	2021-03-08	30	35	Animals
1561	10.3390/ani12121511	2022-03-22	2022-06-04	2022-06-09	74	79	Animals
1562	10.3390/ani12111360	2022-04-12	2022-05-24	2022-05-26	42	44	Animals
1563	10.3390/ani12111406	2022-04-19	2022-05-25	2022-05-30	36	41	Animals
1564	10.3390/ani12111445	2022-03-24	2022-05-31	2022-06-03	68	71	Animals
1565	10.3390/ani12121506	2022-04-04	2022-06-07	2022-06-09	64	66	Animals
1566	10.3390/ani12111469	2022-01-25	2022-05-30	2022-06-06	125	132	Animals
1567	10.3390/ani12121566	2022-04-27	2022-06-15	2022-06-17	49	51	Animals
1568	10.3390/ani12101283	2022-02-11	2022-05-13	2022-05-17	91	95	Animals
1569	10.3390/ani12091086	2022-03-24	2022-04-12	2022-04-22	19	29	Animals
1570	10.3390/ani12101231	2022-04-01	2022-05-07	2022-05-10	36	39	Animals
1571	10.3390/ani12091067	2022-03-24	2022-04-12	2022-04-20	19	27	Animals
1572	10.3390/ani12091069	2022-02-14	2022-04-10	2022-04-20	55	65	Animals
1573	10.3390/ani12091145	2022-03-07	2022-04-26	2022-04-29	50	53	Animals
1574	10.3390/ani12091066	2022-03-07	2022-04-14	2022-04-20	38	44	Animals
1575	10.3390/ani12091155	2022-03-03	2022-04-25	2022-04-29	53	57	Animals
1576	10.3390/ani12091093	2022-03-09	2022-04-21	2022-04-23	43	45	Animals
1577	10.3390/ani12101326	2022-03-31	2022-05-20	2022-05-23	50	53	Animals
1578	10.3390/ani12081040	2022-02-21	2022-04-13	2022-04-16	51	54	Animals
1579	10.3390/ani12070816	2022-02-18	2022-03-18	2022-03-23	28	33	Animals
1580	10.3390/ani12080951	2022-02-28	2022-04-05	2022-04-07	36	38	Animals
1581	10.3390/ani12070891	2022-02-16	2022-03-30	2022-03-31	42	43	Animals
1582	10.3390/ani12070932	2022-02-26	2022-03-31	2022-04-05	33	38	Animals
1583	10.3390/ani12081019	2022-01-23	2022-03-29	2022-04-14	65	81	Animals
1584	10.3390/ani12070929	2022-03-22	2022-03-30	2022-04-05	8	14	Animals
1585	10.3390/ani12060761	2022-02-11	2022-03-16	2022-03-17	33	34	Animals
1586	10.3390/ani12060790	2022-01-01	2022-03-09	2022-03-21	67	79	Animals
1587	10.3390/ani12050665	2021-12-10	2022-03-05	2022-03-07	85	87	Animals
1588	10.3390/ani12050617	2022-02-01	2022-02-26	2022-03-01	25	28	Animals
1589	10.3390/ani12060781	2022-02-15	2022-03-17	2022-03-19	30	32	Animals
1590	10.3390/ani12030336	2021-12-14	2022-01-28	2022-01-29	45	46	Animals
1591	10.3390/ani12030313	2021-11-15	2022-01-21	2022-01-27	67	73	Animals
1592	10.3390/ani12040427	2021-11-16	2021-12-09	2022-02-11	23	87	Animals
1593	10.3390/ani12030261	2021-12-17	2022-01-19	2022-01-21	33	35	Animals
1594	10.3390/ani12020212	2021-12-06	2022-01-13	2022-01-17	38	42	Animals
1595	10.3390/ani12020180	2021-12-22	2022-01-07	2022-01-12	16	21	Animals
1596	10.3390/ani11123544	2021-10-19	2021-11-22	2021-12-14	34	56	Animals
1597	10.3390/ani11123602	2021-11-10	2021-12-17	2021-12-20	37	40	Animals
1598	10.3390/ani11123597	2021-11-04	2021-12-17	2021-12-19	43	45	Animals
1599	10.3390/ani11123423	2021-11-11	2021-11-29	2021-12-01	18	20	Animals
1600	10.3390/ani11113158	2021-09-24	2021-11-03	2021-11-05	40	42	Animals
1601	10.3390/ani11113116	2021-08-15	2021-10-26	2021-10-30	72	76	Animals
1602	10.3390/ani11113160	2021-09-21	2021-10-27	2021-11-05	36	45	Animals
1603	10.3390/ani11113145	2021-09-14	2021-11-02	2021-11-04	49	51	Animals
1604	10.3390/ani11113059	2021-10-11	2021-10-20	2021-10-26	9	15	Animals
1605	10.3390/ani11113065	2021-07-26	2021-10-25	2021-10-27	91	93	Animals
1606	10.3390/ani11113178	2021-09-18	2021-11-04	2021-11-07	47	50	Animals
1607	10.3390/ani11102888	2021-08-23	2021-09-30	2021-10-03	38	41	Animals
1608	10.3390/ani11102927	2021-09-10	2021-10-06	2021-10-10	26	30	Animals
1609	10.3390/ani11102843	2021-08-30	2021-09-27	2021-09-29	28	30	Animals
1610	10.3390/ani11102880	2021-09-13	2021-09-30	2021-10-01	17	18	Animals
1611	10.3390/ani11102991	2021-08-09	2021-10-14	2021-10-18	66	70	Animals
1612	10.3390/ani11102853	2021-09-01	2021-09-22	2021-09-29	21	28	Animals
1613	10.3390/ani11102988	2021-09-02	2021-10-13	2021-10-17	41	45	Animals
1614	10.3390/ani11102915	2021-08-27	2021-10-05	2021-10-09	39	43	Animals
1615	10.3390/ani11092520	2021-04-30	2021-08-25	2021-08-27	117	119	Animals
1616	10.3390/ani11092659	2021-08-09	2021-09-08	2021-09-10	30	32	Animals
1617	10.3390/ani11092561	2021-07-08	2021-08-26	2021-08-31	49	54	Animals
1618	10.3390/ani11092604	2021-06-04	2021-09-01	2021-09-05	89	93	Animals
1619	10.3390/ani11092649	2021-07-30	2021-09-06	2021-09-09	38	41	Animals
1620	10.3390/ani11092619	2021-07-31	2021-09-03	2021-09-07	34	38	Animals
1621	10.3390/ani11092616	2021-07-15	2021-09-03	2021-09-06	50	53	Animals
1622	10.3390/ani11092658	2021-07-19	2021-09-07	2021-09-10	50	53	Animals
1623	10.3390/ani11092514	2021-07-18	2021-08-21	2021-08-26	34	39	Animals
1624	10.3390/ani11092508	2021-08-12	2021-08-25	2021-08-26	13	14	Animals
1625	10.3390/ani11092705	2021-08-10	2021-09-14	2021-09-16	35	37	Animals
1626	10.3390/ani11092535	2021-07-14	2021-08-13	2021-08-29	30	46	Animals
1627	10.3390/ani11092574	2021-07-23	2021-08-31	2021-09-01	39	40	Animals
1628	10.3390/ani11092749	2021-08-31	2021-09-15	2021-09-20	15	20	Animals
1629	10.3390/ani11082278	2021-05-31	2021-07-21	2021-08-02	51	63	Animals
1630	10.3390/ani11082328	2021-06-18	2021-08-05	2021-08-06	48	49	Animals
1631	10.3390/ani11082289	2021-06-29	2021-07-30	2021-08-03	31	35	Animals
1632	10.3390/ani11072014	2021-05-24	2021-06-15	2021-07-06	22	43	Animals
1633	10.3390/ani11072001	2021-06-02	2021-06-30	2021-07-05	28	33	Animals
1634	10.3390/ani11071845	2021-05-11	2021-06-16	2021-06-22	36	42	Animals
1635	10.3390/ani11071892	2021-05-11	2021-06-23	2021-06-25	43	45	Animals
1636	10.3390/ani11071889	2021-03-09	2021-06-15	2021-06-25	98	108	Animals
1637	10.3390/ani11071959	2021-05-05	2021-06-27	2021-06-30	53	56	Animals
1638	10.3390/ani11072131	2021-06-21	2021-07-17	2021-07-19	26	28	Animals
1639	10.3390/ani11071922	2021-06-02	2021-06-25	2021-06-28	23	26	Animals
1640	10.3390/ani11072081	2021-05-28	2021-07-09	2021-07-13	42	46	Animals
1641	10.3390/ani11061593	2021-03-31	2021-05-26	2021-05-28	56	58	Animals
1642	10.3390/ani11061644	2021-03-18	2021-05-31	2021-06-01	74	75	Animals
1643	10.3390/ani11061739	2021-05-06	2021-06-07	2021-06-10	32	35	Animals
1644	10.3390/ani11061695	2021-05-06	2021-05-31	2021-06-07	25	32	Animals
1645	10.3390/ani11061662	2021-03-15	2021-06-01	2021-06-02	78	79	Animals
1646	10.3390/ani11061553	2021-04-23	2021-05-24	2021-05-26	31	33	Animals
1647	10.3390/ani11061797	2021-02-25	2021-05-28	2021-06-16	92	111	Animals
1648	10.3390/ani11061665	2021-05-07	2021-05-30	2021-06-03	23	27	Animals
1649	10.3390/ani11061760	2021-05-13	2021-06-08	2021-06-12	26	30	Animals
1650	10.3390/ani11061595	2021-03-22	2021-05-25	2021-05-28	64	67	Animals
1651	10.3390/ani11061541	2021-04-14	2021-05-22	2021-05-25	38	41	Animals
1652	10.3390/ani11061525	2021-04-13	2021-05-21	2021-05-24	38	41	Animals
1653	10.3390/ani11051349	2021-03-26	2021-05-05	2021-05-10	40	45	Animals
1654	10.3390/ani11051470	2021-04-15	2021-05-17	2021-05-20	32	35	Animals
1655	10.3390/ani11051304	2021-02-05	2021-04-26	2021-04-30	80	84	Animals
1656	10.3390/ani11051425	2021-04-14	2021-05-13	2021-05-16	29	32	Animals
1657	10.3390/ani11051202	2021-02-11	2021-04-20	2021-04-22	68	70	Animals
1658	10.3390/ani11051461	2021-04-19	2021-05-11	2021-05-19	22	30	Animals
1659	10.3390/ani11051291	2021-03-30	2021-04-28	2021-04-30	29	31	Animals
1660	10.3390/ani11051343	2021-03-30	2021-05-03	2021-05-09	34	40	Animals
1661	10.3390/ani11051295	2021-02-06	2021-04-28	2021-04-30	81	83	Animals
1662	10.3390/ani11051394	2021-03-22	2021-05-12	2021-05-13	51	52	Animals
1663	10.3390/ani11040942	2021-02-10	2021-03-24	2021-03-26	42	44	Animals
1664	10.3390/ani11040946	2021-01-21	2021-03-23	2021-03-27	61	65	Animals
1665	10.3390/ani11041120	2021-02-22	2021-04-09	2021-04-14	46	51	Animals
1666	10.3390/ani11040957	2021-02-01	2021-03-24	2021-03-30	51	57	Animals
1667	10.3390/ani11041097	2021-03-03	2021-04-09	2021-04-12	37	40	Animals
1668	10.3390/ani11041017	2021-02-24	2021-04-02	2021-04-04	37	39	Animals
1669	10.3390/ani11041082	2021-02-24	2021-04-06	2021-04-10	41	45	Animals
1670	10.3390/ani11030625	2021-01-27	2021-02-22	2021-02-26	26	30	Animals
1671	10.3390/ani11030915	2021-01-18	2021-03-18	2021-03-23	59	64	Animals
1672	10.3390/ani11030768	2021-02-23	2021-03-04	2021-03-10	9	15	Animals
1673	10.3390/ani11030865	2021-02-18	2021-03-14	2021-03-18	24	28	Animals
1674	10.3390/ani11030821	2021-01-30	2021-03-10	2021-03-15	39	44	Animals
1675	10.3390/ani11030628	2021-02-02	2021-02-24	2021-02-27	22	25	Animals
1676	10.3390/ani11030769	2021-02-04	2021-03-03	2021-03-10	27	34	Animals
1694	10.3390/ani12111434	2022-04-15	2022-05-31	2022-06-02	46	48	Animals
1695	10.3390/ani12121574	2022-04-16	2022-06-16	2022-06-18	61	63	Animals
1696	10.3390/ani12111453	2022-04-21	2022-06-01	2022-06-04	41	44	Animals
1697	10.3390/ani12121549	2022-04-28	2022-06-08	2022-06-15	41	48	Animals
1698	10.3390/ani12101333	2022-04-05	2022-05-13	2022-05-23	38	48	Animals
1699	10.3390/ani12101314	2022-03-16	2022-05-19	2022-05-20	64	65	Animals
1700	10.3390/ani12101241	2022-03-15	2022-05-05	2022-05-12	51	58	Animals
1701	10.3390/ani12091102	2022-03-06	2022-04-19	2022-04-25	44	50	Animals
1702	10.3390/ani12101260	2022-04-14	2022-05-10	2022-05-13	26	29	Animals
1703	10.3390/ani12091146	2022-03-11	2022-04-24	2022-04-29	44	49	Animals
1704	10.3390/ani12091149	2022-03-31	2022-04-27	2022-04-29	27	29	Animals
1705	10.3390/ani12091165	2022-03-24	2022-04-29	2022-05-02	36	39	Animals
1706	10.3390/ani12101321	2022-04-11	2022-05-20	2022-05-22	39	41	Animals
1707	10.3390/ani12070806	2022-01-08	2022-03-18	2022-03-22	69	73	Animals
1708	10.3390/ani12080969	2022-02-10	2022-04-05	2022-04-08	54	57	Animals
1709	10.3390/ani12070938	2022-03-04	2022-04-04	2022-04-06	31	33	Animals
1710	10.3390/ani12070846	2022-02-28	2022-03-26	2022-03-28	26	28	Animals
1711	10.3390/ani12070835	2022-02-25	2022-03-18	2022-03-25	21	28	Animals
1712	10.3390/ani12070923	2022-03-15	2022-04-02	2022-04-04	18	20	Animals
1713	10.3390/ani12050561	2022-01-15	2022-02-21	2022-02-23	37	39	Animals
1714	10.3390/ani12050606	2021-11-25	2022-02-21	2022-02-28	88	95	Animals
1715	10.3390/ani12050649	2022-01-17	2022-03-01	2022-03-03	43	45	Animals
1716	10.3390/ani12050533	2022-01-22	2022-02-17	2022-02-22	26	31	Animals
1717	10.3390/ani12060709	2022-01-25	2022-03-07	2022-03-11	41	45	Animals
1718	10.3390/ani12050545	2022-01-12	2022-02-19	2022-02-22	38	41	Animals
1719	10.3390/ani12060737	2022-02-05	2022-03-11	2022-03-16	34	39	Animals
1720	10.3390/ani12050565	2021-12-23	2022-02-18	2022-02-23	57	62	Animals
1721	10.3390/ani12050587	2022-01-06	2022-02-23	2022-02-25	48	50	Animals
1722	10.3390/ani12050668	2021-11-30	2022-03-04	2022-03-07	94	97	Animals
1723	10.3390/ani12030280	2021-11-23	2022-01-20	2022-01-23	58	61	Animals
1724	10.3390/ani12030398	2021-12-15	2022-01-31	2022-02-08	47	55	Animals
1725	10.3390/ani12030218	2021-12-09	2022-01-14	2022-01-18	36	40	Animals
1726	10.3390/ani12030316	2021-12-09	2022-01-26	2022-01-27	48	49	Animals
1727	10.3390/ani12030268	2021-10-23	2022-01-03	2022-01-22	72	91	Animals
1728	10.3390/ani12030319	2021-12-01	2022-01-24	2022-01-28	54	58	Animals
1729	10.3390/ani12030358	2021-12-21	2022-01-30	2022-02-01	40	42	Animals
1730	10.3390/ani12040435	2021-12-21	2022-02-10	2022-02-11	51	52	Animals
1731	10.3390/ani12020138	2021-11-20	2022-01-04	2022-01-07	45	48	Animals
1732	10.3390/ani12010117	2021-12-17	2021-12-30	2022-01-04	13	18	Animals
1733	10.3390/ani12020215	2021-11-24	2022-01-13	2022-01-17	50	54	Animals
1734	10.3390/ani12020179	2021-12-17	2022-01-10	2022-01-12	24	26	Animals
1735	10.3390/ani12010120	2021-11-11	2021-12-29	2022-01-05	48	55	Animals
1736	10.3390/ani12010059	2021-12-09	2021-12-24	2021-12-28	15	19	Animals
1737	10.3390/ani11123343	2021-09-18	2021-11-15	2021-11-23	58	66	Animals
1738	10.3390/ani11123421	2021-10-30	2021-11-27	2021-11-30	28	31	Animals
1739	10.3390/ani11123417	2021-10-08	2021-11-27	2021-11-30	50	53	Animals
1740	10.3390/ani11123375	2021-10-31	2021-11-23	2021-11-25	23	25	Animals
1741	10.3390/ani11123383	2021-10-04	2021-11-22	2021-11-26	49	53	Animals
1742	10.3390/ani11123415	2021-11-05	2021-11-24	2021-11-30	19	25	Animals
1743	10.3390/ani11123396	2021-09-29	2021-11-23	2021-11-28	55	60	Animals
1744	10.3390/ani11123568	2021-11-05	2021-12-11	2021-12-15	36	40	Animals
1745	10.3390/ani11123511	2021-10-07	2021-12-06	2021-12-09	60	63	Animals
1746	10.3390/ani11123362	2021-10-20	2021-11-18	2021-11-24	29	35	Animals
1747	10.3390/ani11123519	2021-11-14	2021-12-07	2021-12-10	23	26	Animals
1748	10.3390/ani11113161	2021-09-07	2021-11-02	2021-11-05	56	59	Animals
1749	10.3390/ani11113009	2021-09-03	2021-10-19	2021-10-20	46	47	Animals
1750	10.3390/ani11113190	2021-09-15	2021-11-05	2021-11-08	51	54	Animals
1751	10.3390/ani11113029	2021-08-24	2021-10-19	2021-10-21	56	58	Animals
1752	10.3390/ani11113073	2021-08-18	2021-09-14	2021-10-28	27	71	Animals
1753	10.3390/ani11113318	2021-09-20	2021-11-17	2021-11-20	58	61	Animals
1754	10.3390/ani11113284	2021-09-22	2021-11-14	2021-11-17	53	56	Animals
1755	10.3390/ani11113159	2021-10-03	2021-11-04	2021-11-05	32	33	Animals
1756	10.3390/ani11113018	2021-05-31	2021-10-15	2021-10-20	137	142	Animals
1757	10.3390/ani11102874	2021-08-03	2021-09-21	2021-09-30	49	58	Animals
1758	10.3390/ani11102840	2021-07-26	2021-08-23	2021-09-29	28	65	Animals
1759	10.3390/ani11102948	2021-09-13	2021-10-09	2021-10-13	26	30	Animals
1760	10.3390/ani11103002	2021-09-15	2021-10-16	2021-10-19	31	34	Animals
1761	10.3390/ani11102829	2021-09-04	2021-09-22	2021-09-28	18	24	Animals
1762	10.3390/ani11102846	2021-09-01	2021-09-26	2021-09-29	25	28	Animals
1763	10.3390/ani11092478	2021-06-23	2021-08-19	2021-08-24	57	62	Animals
1764	10.3390/ani11092625	2021-06-29	2021-09-02	2021-09-07	65	70	Animals
1765	10.3390/ani11092557	2021-06-30	2021-08-28	2021-08-31	59	62	Animals
1766	10.3390/ani11092650	2021-07-13	2021-09-08	2021-09-09	57	58	Animals
1767	10.3390/ani11092565	2021-07-30	2021-08-27	2021-08-31	28	32	Animals
1768	10.3390/ani11092602	2021-07-30	2021-09-01	2021-09-04	33	36	Animals
1769	10.3390/ani11092742	2021-07-27	2021-09-16	2021-09-19	51	54	Animals
1770	10.3390/ani11092741	2021-08-20	2021-09-08	2021-09-19	19	30	Animals
1771	10.3390/ani11092537	2021-07-27	2021-08-26	2021-08-29	30	33	Animals
1772	10.3390/ani11082457	2021-07-28	2021-08-19	2021-08-21	22	24	Animals
1773	10.3390/ani11082369	2021-07-07	2021-08-09	2021-08-11	33	35	Animals
1774	10.3390/ani11082380	2021-06-07	2021-08-07	2021-08-12	61	66	Animals
1775	10.3390/ani11082335	2021-06-18	2021-08-05	2021-08-07	48	50	Animals
1776	10.3390/ani11082447	2021-07-12	2021-08-19	2021-08-20	38	39	Animals
1777	10.3390/ani11082372	2021-07-07	2021-08-06	2021-08-11	30	35	Animals
1778	10.3390/ani11082435	2021-07-22	2021-08-16	2021-08-18	25	27	Animals
1779	10.3390/ani11082232	2021-06-15	2021-07-27	2021-07-29	42	44	Animals
1780	10.3390/ani11082433	2021-07-13	2021-08-17	2021-08-18	35	36	Animals
1781	10.3390/ani11082400	2021-07-27	2021-08-10	2021-08-13	14	17	Animals
1782	10.3390/ani11082263	2021-06-30	2021-07-28	2021-07-30	28	30	Animals
1783	10.3390/ani11071976	2021-05-18	2021-06-14	2021-07-01	27	44	Animals
1784	10.3390/ani11072136	2021-06-10	2021-07-16	2021-07-19	36	39	Animals
1785	10.3390/ani11072099	2021-06-25	2021-07-10	2021-07-15	15	20	Animals
1786	10.3390/ani11072110	2021-06-16	2021-07-12	2021-07-15	26	29	Animals
1787	10.3390/ani11071975	2021-05-07	2021-06-29	2021-07-01	53	55	Animals
1788	10.3390/ani11071987	2021-05-10	2021-06-30	2021-07-02	51	53	Animals
1789	10.3390/ani11061489	2021-04-22	2021-05-20	2021-05-21	28	29	Animals
1790	10.3390/ani11061647	2021-05-07	2021-06-01	2021-06-01	25	25	Animals
1791	10.3390/ani11061723	2021-05-05	2021-06-04	2021-06-09	30	35	Animals
1792	10.3390/ani11061825	2021-05-11	2021-06-16	2021-06-18	36	38	Animals
1793	10.3390/ani11051254	2021-03-05	2021-04-22	2021-04-27	48	53	Animals
1794	10.3390/ani11051229	2021-03-19	2021-04-23	2021-04-24	35	36	Animals
1795	10.3390/ani11051303	2021-03-20	2021-04-29	2021-04-30	40	41	Animals
1796	10.3390/ani11051192	2021-03-08	2021-04-15	2021-04-21	38	44	Animals
1797	10.3390/ani11051456	2021-04-19	2021-05-18	2021-05-19	29	30	Animals
1798	10.3390/ani11051324	2021-03-17	2021-03-31	2021-05-06	14	50	Animals
1799	10.3390/ani11051334	2021-03-22	2021-04-14	2021-05-07	23	46	Animals
1800	10.3390/ani11051211	2021-03-03	2021-04-21	2021-04-22	49	50	Animals
1801	10.3390/ani11051209	2021-01-30	2021-04-15	2021-04-22	75	82	Animals
1802	10.3390/ani11051296	2021-03-29	2021-04-28	2021-04-30	30	32	Animals
1803	10.3390/ani11051439	2021-04-10	2021-05-10	2021-05-18	30	38	Animals
1804	10.3390/ani11051271	2021-04-06	2021-04-26	2021-04-28	20	22	Animals
1805	10.3390/ani11051413	2021-03-22	2021-05-10	2021-05-14	49	53	Animals
1806	10.3390/ani11051430	2021-04-14	2021-05-14	2021-05-17	30	33	Animals
1807	10.3390/ani11040988	2021-01-31	2021-03-29	2021-04-01	57	60	Animals
1808	10.3390/ani11041180	2021-03-04	2021-04-16	2021-04-20	43	47	Animals
[truncated: 27,055 more rows]
